# Supplementary material for: Preparedness and Preventive Behaviors for a Pandemic Disaster Caused by COVID-19 in Serbia
Source: Int J Environ Res Public Health. 2020 Jun 9;17(11):4124. doi: 10.3390/ijerph17114124 (PMC7313005; doi:10.3390/ijerph17114124)
Supplement: Supplementary file 1 [file ijerph-17-04124-s001.pdf]

## Supplementary Material

Data: Anova results with Post hoc Tests with gender, age and education variable

| ANOVA                               |                |                |     |             |       |      |
|-------------------------------------|----------------|----------------|-----|-------------|-------|------|
|                                     |                | Sum of Squares | df  | Mean Square | F     | Sig. |
| Individual preparedness             | Between Groups | 20.969         | 4   | 5.242       | 6.642 | .000 |
|                                     | Within Groups  | 765.621        | 970 | .789        |       |      |
|                                     | Total          | 786.591        | 974 |             |       |      |
| Household preparedness              | Between Groups | 11.988         | 4   | 2.997       | 3.444 | .008 |
|                                     | Within Groups  | 844.221        | 970 | .870        |       |      |
|                                     | Total          | 856.209        | 974 |             |       |      |
| Local government preparedness       | Between Groups | 21.409         | 4   | 5.352       | 5.110 | .000 |
|                                     | Within Groups  | 1015.982       | 970 | 1.047       |       |      |
|                                     | Total          | 1037.391       | 974 |             |       |      |
| State preparedness                  | Between Groups | 19.861         | 4   | 4.965       | 4.607 | .001 |
|                                     | Within Groups  | 1045.370       | 970 | 1.078       |       |      |
|                                     | Total          | 1065.231       | 974 |             |       |      |
| Individual knowledge for responding | Between Groups | 27.719         | 4   | 6.930       | 7.643 | .000 |
|                                     | Within Groups  | 879.444        | 970 | .907        |       |      |
|                                     | Total          | 907.163        | 974 |             |       |      |
| Enough training for responding      | Between Groups | 31.597         | 4   | 7.899       | 6.988 | .000 |
|                                     | Within Groups  | 1096.440       | 970 | 1.130       |       |      |
|                                     | Total          | 1128.037       | 974 |             |       |      |
| Food supplies                       | Between Groups | 44.808         | 4   | 11.202      | 8.955 | .000 |
|                                     | Within Groups  | 1213.401       | 970 | 1.251       |       |      |
|                                     | Total          | 1258.209       | 974 |             |       |      |

|                               |                |          |     |        |        |      |
|-------------------------------|----------------|----------|-----|--------|--------|------|
| Protective equipment          | Between Groups | 22.648   | 4   | 5.662  | 3.693  | .005 |
|                               | Within Groups  | 1487.044 | 970 | 1.533  |        |      |
|                               | Total          | 1509.692 | 974 |        |        |      |
| Response plans                | Between Groups | 48.250   | 4   | 12.063 | 10.952 | .000 |
|                               | Within Groups  | 1068.359 | 970 | 1.101  |        |      |
|                               | Total          | 1116.609 | 974 |        |        |      |
| Household knowledge           | Between Groups | 29.639   | 4   | 7.410  | 8.224  | .000 |
|                               | Within Groups  | 873.998  | 970 | .901   |        |      |
|                               | Total          | 903.637  | 974 |        |        |      |
| First responders preparedness | Between Groups | 20.184   | 4   | 5.046  | 4.878  | .001 |
|                               | Within Groups  | 1003.380 | 970 | 1.034  |        |      |
|                               | Total          | 1023.563 | 974 |        |        |      |

| Multiple Comparisons    |                |                  |                       |            |       |                         |             |
|-------------------------|----------------|------------------|-----------------------|------------|-------|-------------------------|-------------|
| Tukey HSD               |                |                  |                       |            |       |                         |             |
| Dependent Variable      | (I) Education  | (J) Education    | Mean Difference (I-J) | Std. Error | Sig.  | 95% Confidence Interval |             |
|                         |                |                  |                       |            |       | Lower Bound             | Upper Bound |
| Individual preparedness | Primary sch.   | Srednja          | 1.513*                | .516       | .029  | .10                     | 2.92        |
|                         |                | Visa             | 1.524*                | .525       | .031  | .09                     | 2.96        |
|                         |                | Fakultet         | 1.478*                | .514       | .034  | .07                     | 2.88        |
|                         |                | Master/doktorske | 1.108                 | .520       | .207  | -.31                    | 2.53        |
|                         | High-school    | Primary sch.     | -1.513*               | .516       | .029  | -2.92                   | -.10        |
|                         |                | Visa             | .011                  | .126       | 1.000 | -.33                    | .36         |
|                         |                | Fakultet         | -.034                 | .069       | .988  | -.22                    | .15         |
|                         |                | Master/doktorske | -.404*                | .102       | .001  | -.68                    | -.13        |
|                         | Junior college | Primary sch.     | -1.524*               | .525       | .031  | -2.96                   | -.09        |
|                         |                | High-school      | -.011                 | .126       | 1.000 | -.36                    | .33         |
|                         |                | Fakultet         | -.045                 | .118       | .995  | -.37                    | .28         |
|                         |                | Master/doktorske | -.416*                | .140       | .026  | -.80                    | -.03        |
|                         | Undergraduate  | Primary sch.     | -1.478*               | .514       | .034  | -2.88                   | -.07        |
|                         |                | High-school      | .034                  | .069       | .988  | -.15                    | .22         |

|                               |                  |                  |         |      |       |       |      |
|-------------------------------|------------------|------------------|---------|------|-------|-------|------|
|                               |                  | Junior college   | .045    | .118 | .995  | -.28  | .37  |
|                               |                  | Master/doktorske | -.370*  | .092 | .001  | -.62  | -.12 |
|                               | Master/doctorate | Primary sch.     | -1.108  | .520 | .207  | -2.53 | .31  |
|                               |                  | High-school      | .404*   | .102 | .001  | .13   | .68  |
|                               |                  | Junior college   | .416*   | .140 | .026  | .03   | .80  |
|                               |                  | Undergraduate    | .370*   | .092 | .001  | .12   | .62  |
| Household preparedness        | Primary sch.     | High-school      | 1.438   | .542 | .062  | -.04  | 2.92 |
|                               |                  | Junior college   | 1.429   | .551 | .073  | -.08  | 2.94 |
|                               |                  | Undergraduate    | 1.468   | .540 | .052  | -.01  | 2.94 |
|                               |                  | Master/doctorate | 1.216   | .546 | .170  | -.28  | 2.71 |
|                               | High-school      | Primary sch.     | -1.438  | .542 | .062  | -2.92 | .04  |
|                               |                  | Junior college   | -.009   | .132 | 1.000 | -.37  | .35  |
|                               |                  | Undergraduate    | .030    | .072 | .993  | -.17  | .23  |
|                               |                  | Master/doctorate | -.221   | .107 | .236  | -.51  | .07  |
|                               | Junior college   | Primary sch.     | -1.429  | .551 | .073  | -2.94 | .08  |
|                               |                  | High-school      | .009    | .132 | 1.000 | -.35  | .37  |
|                               |                  | Undergraduate    | .039    | .124 | .998  | -.30  | .38  |
|                               |                  | Master/doctorate | -.212   | .147 | .600  | -.61  | .19  |
|                               | Undergraduate    | Primary sch.     | -1.468  | .540 | .052  | -2.94 | .01  |
|                               |                  | High-school      | -.030   | .072 | .993  | -.23  | .17  |
|                               |                  | Junior college   | -.039   | .124 | .998  | -.38  | .30  |
|                               |                  | Master/doctorate | -.252   | .097 | .072  | -.52  | .01  |
|                               | Master/doctorate | Primary sch.     | -1.216  | .546 | .170  | -2.71 | .28  |
|                               |                  | High-school      | .221    | .107 | .236  | -.07  | .51  |
|                               |                  | Junior college   | .212    | .147 | .600  | -.19  | .61  |
|                               |                  | Undergraduate    | .252    | .097 | .072  | -.01  | .52  |
| Local government preparedness | Primary sch.     | High-school      | 2.138*  | .595 | .003  | .51   | 3.76 |
|                               |                  | Junior college   | 2.190*  | .605 | .003  | .54   | 3.84 |
|                               |                  | Undergraduate    | 2.274*  | .592 | .001  | .66   | 3.89 |
|                               |                  | Master/doctorate | 2.405*  | .599 | .001  | .77   | 4.04 |
|                               | High-school      | Primary sch.     | -2.138* | .595 | .003  | -3.76 | -.51 |
|                               |                  | Junior college   | .053    | .145 | .996  | -.34  | .45  |
|                               |                  | Undergraduate    | .137    | .079 | .416  | -.08  | .35  |
|                               |                  | Master/doctorate | .268    | .117 | .152  | -.05  | .59  |
|                               | Junior college   | Primary sch.     | -2.190* | .605 | .003  | -3.84 | -.54 |
|                               |                  | High-school      | -.053   | .145 | .996  | -.45  | .34  |
|                               |                  | Undergraduate    | .084    | .136 | .973  | -.29  | .46  |
|                               |                  | Master/doctorate | .215    | .161 | .672  | -.23  | .66  |
|                               | Undergraduate    | Primary sch.     | -2.274* | .592 | .001  | -3.89 | -.66 |
|                               |                  | High-school      | -.137   | .079 | .416  | -.35  | .08  |
|                               |                  | Junior college   | -.084   | .136 | .973  | -.46  | .29  |
|                               |                  | Master/doctorate | .131    | .106 | .732  | -.16  | .42  |

|                                        |                  |                  |         |      |       |       |      |
|----------------------------------------|------------------|------------------|---------|------|-------|-------|------|
|                                        | Master/doctorate | Primary sch.     | -2.405* | .599 | .001  | -4.04 | -.77 |
|                                        |                  | High-school      | -.268   | .117 | .152  | -.59  | .05  |
|                                        |                  | Junior college   | -.215   | .161 | .672  | -.66  | .23  |
|                                        |                  | Undergraduate    | -.131   | .106 | .732  | -.42  | .16  |
| State preparedness                     | Primary sch.     | High-school      | 1.888*  | .603 | .015  | .24   | 3.54 |
|                                        |                  | Junior college   | 1.524   | .613 | .095  | -.15  | 3.20 |
|                                        |                  | Undergraduate    | 1.903*  | .601 | .014  | .26   | 3.55 |
|                                        |                  | Master/doctorate | 1.973*  | .607 | .011  | .31   | 3.63 |
|                                        | High-school      | Primary sch.     | -1.888* | .603 | .015  | -3.54 | -.24 |
|                                        |                  | Junior college   | -.364   | .147 | .097  | -.77  | .04  |
|                                        |                  | Undergraduate    | .016    | .080 | 1.000 | -.20  | .23  |
|                                        |                  | Master/doctorate | .085    | .119 | .953  | -.24  | .41  |
|                                        | Junior college   | Primary sch.     | -1.524  | .613 | .095  | -3.20 | .15  |
|                                        |                  | High-school      | .364    | .147 | .097  | -.04  | .77  |
|                                        |                  | Undergraduate    | .379*   | .138 | .048  | .00   | .76  |
|                                        |                  | Master/doctorate | .449*   | .164 | .049  | .00   | .90  |
|                                        | Undergraduate    | Primary sch.     | -1.903* | .601 | .014  | -3.55 | -.26 |
|                                        |                  | High-school      | -.016   | .080 | 1.000 | -.23  | .20  |
|                                        |                  | Junior college   | -.379*  | .138 | .048  | -.76  | .00  |
|                                        |                  | Master/doctorate | .070    | .108 | .967  | -.23  | .36  |
|                                        | Master/doctorate | Primary sch.     | -1.973* | .607 | .011  | -3.63 | -.31 |
|                                        |                  | High-school      | -.085   | .119 | .953  | -.41  | .24  |
|                                        |                  | Junior college   | -.449*  | .164 | .049  | -.90  | .00  |
|                                        |                  | Undergraduate    | -.070   | .108 | .967  | -.36  | .23  |
| Individual knowledge<br>for responding | Primary sch.     | High-school      | 1.638*  | .553 | .026  | .13   | 3.15 |
|                                        |                  | Junior college   | 1.286   | .563 | .151  | -.25  | 2.82 |
|                                        |                  | Undergraduate    | 1.677*  | .551 | .020  | .17   | 3.18 |
|                                        |                  | Master/doctorate | 1.297   | .557 | .137  | -.23  | 2.82 |
|                                        | High-school      | Primary sch.     | -1.638* | .553 | .026  | -3.15 | -.13 |
|                                        |                  | Junior college   | -.352   | .135 | .069  | -.72  | .02  |
|                                        |                  | Undergraduate    | .040    | .074 | .983  | -.16  | .24  |
|                                        |                  | Master/doctorate | -.340*  | .109 | .016  | -.64  | -.04 |
|                                        | Junior college   | Primary sch.     | -1.286  | .563 | .151  | -2.82 | .25  |
|                                        |                  | High-school      | .352    | .135 | .069  | -.02  | .72  |
|                                        |                  | Undergraduate    | .392*   | .127 | .017  | .05   | .74  |
|                                        |                  | Master/doctorate | .012    | .150 | 1.000 | -.40  | .42  |
|                                        | Undergraduate    | Primary sch.     | -1.677* | .551 | .020  | -3.18 | -.17 |
|                                        |                  | High-school      | -.040   | .074 | .983  | -.24  | .16  |
|                                        |                  | Junior college   | -.392*  | .127 | .017  | -.74  | -.05 |
|                                        |                  | Master/doctorate | -.380*  | .099 | .001  | -.65  | -.11 |
|                                        | Master/doctorate | Primary sch.     | -1.297  | .557 | .137  | -2.82 | .23  |
|                                        |                  | High-school      | .340*   | .109 | .016  | .04   | .64  |

|                                |                  |                  |         |      |       |       |      |
|--------------------------------|------------------|------------------|---------|------|-------|-------|------|
|                                |                  | Junior college   | -.012   | .150 | 1.000 | -.42  | .40  |
|                                |                  | Undergraduate    | .380*   | .099 | .001  | .11   | .65  |
| Enough training for responding | Primary sch.     | High-school      | 1.963*  | .618 | .013  | .27   | 3.65 |
|                                |                  | Junior college   | 1.667   | .628 | .062  | -.05  | 3.38 |
|                                |                  | Undergraduate    | 1.962*  | .615 | .013  | .28   | 3.64 |
|                                |                  | Master/doctorate | 1.541   | .622 | .097  | -.16  | 3.24 |
|                                | High-school      | Primary sch.     | -1.963* | .618 | .013  | -3.65 | -.27 |
|                                |                  | Junior college   | -.296   | .151 | .284  | -.71  | .12  |
|                                |                  | Undergraduate    | .000    | .082 | 1.000 | -.22  | .22  |
|                                |                  | Master/doctorate | -.422*  | .122 | .005  | -.76  | -.09 |
|                                | Junior college   | Primary sch.     | -1.667  | .628 | .062  | -3.38 | .05  |
|                                |                  | High-school      | .296    | .151 | .284  | -.12  | .71  |
|                                |                  | Undergraduate    | .296    | .141 | .224  | -.09  | .68  |
|                                |                  | Master/doctorate | -.126   | .168 | .944  | -.58  | .33  |
|                                | Undergraduate    | Primary sch.     | -1.962* | .615 | .013  | -3.64 | -.28 |
|                                |                  | High-school      | .000    | .082 | 1.000 | -.22  | .22  |
|                                |                  | Junior college   | -.296   | .141 | .224  | -.68  | .09  |
|                                |                  | Master/doctorate | -.422*  | .110 | .001  | -.72  | -.12 |
|                                | Master/doctorate | Primary sch.     | -1.541  | .622 | .097  | -3.24 | .16  |
|                                |                  | High-school      | .422*   | .122 | .005  | .09   | .76  |
|                                |                  | Junior college   | .126    | .168 | .944  | -.33  | .58  |
|                                |                  | Undergraduate    | .422*   | .110 | .001  | .12   | .72  |
| Food supplies                  | Primary sch.     | High-school      | 1.875*  | .650 | .033  | .10   | 3.65 |
|                                |                  | Junior college   | 1.857*  | .661 | .040  | .05   | 3.66 |
|                                |                  | Undergraduate    | 1.452   | .647 | .165  | -.32  | 3.22 |
|                                |                  | Master/doctorate | 1.432   | .654 | .185  | -.36  | 3.22 |
|                                | High-school      | Primary sch.     | -1.875* | .650 | .033  | -3.65 | -.10 |
|                                |                  | Junior college   | -.018   | .158 | 1.000 | -.45  | .41  |
|                                |                  | Undergraduate    | -.423*  | .086 | .000  | -.66  | -.19 |
|                                |                  | Master/doctorate | -.443*  | .128 | .005  | -.79  | -.09 |
|                                | Junior college   | Primary sch.     | -1.857* | .661 | .040  | -3.66 | -.05 |
|                                |                  | High-school      | .018    | .158 | 1.000 | -.41  | .45  |
|                                |                  | Undergraduate    | -.406   | .149 | .051  | -.81  | .00  |
|                                |                  | Master/doctorate | -.425   | .176 | .114  | -.91  | .06  |
|                                | Undergraduate    | Primary sch.     | -1.452  | .647 | .165  | -3.22 | .32  |
|                                |                  | High-school      | .423*   | .086 | .000  | .19   | .66  |
|                                |                  | Junior college   | .406    | .149 | .051  | .00   | .81  |
|                                |                  | Master/doctorate | -.019   | .116 | 1.000 | -.34  | .30  |
|                                | Master/doctorate | Primary sch.     | -1.432  | .654 | .185  | -3.22 | .36  |
|                                |                  | High-school      | .443*   | .128 | .005  | .09   | .79  |
|                                |                  | Junior college   | .425    | .176 | .114  | -.06  | .91  |
|                                |                  | Undergraduate    | .019    | .116 | 1.000 | -.30  | .34  |

|                      |                  |                  |         |      |       |       |      |
|----------------------|------------------|------------------|---------|------|-------|-------|------|
| Protective equipment | Primary sch.     | High-school      | 2.100*  | .719 | .029  | .13   | 4.07 |
|                      |                  | Junior college   | 1.857   | .732 | .083  | -.14  | 3.86 |
|                      |                  | Undergraduate    | 1.866   | .717 | .071  | -.09  | 3.82 |
|                      |                  | Master/doctorate | 1.784   | .724 | .100  | -.20  | 3.76 |
|                      | High-school      | Primary sch.     | -2.100* | .719 | .029  | -4.07 | -.13 |
|                      |                  | Junior college   | -.243   | .175 | .637  | -.72  | .24  |
|                      |                  | Undergraduate    | -.234   | .096 | .103  | -.50  | .03  |
|                      |                  | Master/doctorate | -.316   | .142 | .171  | -.70  | .07  |
|                      | Junior college   | Primary sch.     | -1.857  | .732 | .083  | -3.86 | .14  |
|                      |                  | High-school      | .243    | .175 | .637  | -.24  | .72  |
|                      |                  | Undergraduate    | .008    | .165 | 1.000 | -.44  | .46  |
|                      |                  | Master/doctorate | -.073   | .195 | .996  | -.61  | .46  |
|                      | Undergraduate    | Primary sch.     | -1.866  | .717 | .071  | -3.82 | .09  |
|                      |                  | High-school      | .234    | .096 | .103  | -.03  | .50  |
|                      |                  | Junior college   | -.008   | .165 | 1.000 | -.46  | .44  |
|                      |                  | Master/doctorate | -.082   | .129 | .969  | -.43  | .27  |
|                      | Master/doctorate | Primary sch.     | -1.784  | .724 | .100  | -3.76 | .20  |
|                      |                  | High-school      | .316    | .142 | .171  | -.07  | .70  |
|                      |                  | Junior college   | .073    | .195 | .996  | -.46  | .61  |
|                      |                  | Undergraduate    | .082    | .129 | .969  | -.27  | .43  |
| Response plans       | Primary sch.     | High-school      | 1.862*  | .610 | .020  | .20   | 3.53 |
|                      |                  | Junior college   | 1.714*  | .620 | .046  | .02   | 3.41 |
|                      |                  | Undergraduate    | 1.978*  | .608 | .010  | .32   | 3.64 |
|                      |                  | Master/doctorate | 1.351   | .614 | .180  | -.33  | 3.03 |
|                      | High-school      | Primary sch.     | -1.862* | .610 | .020  | -3.53 | -.20 |
|                      |                  | Junior college   | -.148   | .149 | .856  | -.55  | .26  |
|                      |                  | Undergraduate    | .116    | .081 | .607  | -.11  | .34  |
|                      |                  | Master/doctorate | -.511*  | .120 | .000  | -.84  | -.18 |
|                      | Junior college   | Primary sch.     | -1.714* | .620 | .046  | -3.41 | -.02 |
|                      |                  | High-school      | .148    | .149 | .856  | -.26  | .55  |
|                      |                  | Undergraduate    | .264    | .139 | .321  | -.12  | .65  |
|                      |                  | Master/doctorate | -.363   | .166 | .183  | -.82  | .09  |
|                      | Undergraduate    | Primary sch.     | -1.978* | .608 | .010  | -3.64 | -.32 |
|                      |                  | High-school      | -.116   | .081 | .607  | -.34  | .11  |
|                      |                  | Junior college   | -.264   | .139 | .321  | -.65  | .12  |
|                      |                  | Master/doctorate | -.627*  | .109 | .000  | -.93  | -.33 |
|                      | Master/doctorate | Primary sch.     | -1.351  | .614 | .180  | -3.03 | .33  |
|                      |                  | High-school      | .511*   | .120 | .000  | .18   | .84  |
|                      |                  | Junior college   | .363    | .166 | .183  | -.09  | .82  |
|                      |                  | Undergraduate    | .627*   | .109 | .000  | .33   | .93  |
| Household knowledge  | Primary sch.     | High-school      | 1.575*  | .551 | .035  | .07   | 3.08 |
|                      |                  | Junior college   | 1.238   | .561 | .178  | -.29  | 2.77 |

|                                                          |                  |                  |         |      |      |       |      |
|----------------------------------------------------------|------------------|------------------|---------|------|------|-------|------|
|                                                          |                  | Undergraduate    | 1.591*  | .550 | .032 | .09   | 3.09 |
|                                                          |                  | Master/doctorate | 1.162   | .555 | .224 | -.36  | 2.68 |
|                                                          | High-school      | Primary sch.     | -1.575* | .551 | .035 | -3.08 | -.07 |
|                                                          |                  | Junior college   | -.337   | .134 | .090 | -.70  | .03  |
|                                                          |                  | Undergraduate    | .016    | .073 | .999 | -.18  | .22  |
|                                                          |                  | Master/doctorate | -.413*  | .109 | .002 | -.71  | -.12 |
|                                                          | Junior college   | Primary sch.     | -1.238  | .561 | .178 | -2.77 | .29  |
|                                                          |                  | High-school      | .337    | .134 | .090 | -.03  | .70  |
|                                                          |                  | Undergraduate    | .353*   | .126 | .041 | .01   | .70  |
|                                                          |                  | Master/doctorate | -.076   | .150 | .987 | -.49  | .33  |
|                                                          | Undergraduate    | Primary sch.     | -1.591* | .550 | .032 | -3.09 | -.09 |
|                                                          |                  | High-school      | -.016   | .073 | .999 | -.22  | .18  |
|                                                          |                  | Junior college   | -.353*  | .126 | .041 | -.70  | -.01 |
|                                                          |                  | Master/doctorate | -.429*  | .099 | .000 | -.70  | -.16 |
|                                                          | Master/doctorate | Primary sch.     | -1.162  | .555 | .224 | -2.68 | .36  |
|                                                          |                  | High-school      | .413*   | .109 | .002 | .12   | .71  |
|                                                          |                  | Junior college   | .076    | .150 | .987 | -.33  | .49  |
|                                                          |                  | Undergraduate    | .429*   | .099 | .000 | .16   | .70  |
| First responders<br>preparedness                         | Primary sch.     | High-school      | 1.100   | .591 | .339 | -.51  | 2.71 |
|                                                          |                  | Junior college   | 1.286   | .601 | .204 | -.36  | 2.93 |
|                                                          |                  | Undergraduate    | 1.183   | .589 | .262 | -.43  | 2.79 |
|                                                          |                  | Master/doctorate | 1.541   | .595 | .073 | -.09  | 3.17 |
|                                                          | High-school      | Primary sch.     | -1.100  | .591 | .339 | -2.71 | .51  |
|                                                          |                  | Junior college   | .186    | .144 | .698 | -.21  | .58  |
|                                                          |                  | Undergraduate    | .083    | .079 | .830 | -.13  | .30  |
|                                                          |                  | Master/doctorate | .441*   | .117 | .002 | .12   | .76  |
|                                                          | Junior college   | Primary sch.     | -1.286  | .601 | .204 | -2.93 | .36  |
|                                                          |                  | High-school      | -.186   | .144 | .698 | -.58  | .21  |
|                                                          |                  | Undergraduate    | -.103   | .135 | .942 | -.47  | .27  |
|                                                          |                  | Master/doctorate | .255    | .160 | .505 | -.18  | .69  |
|                                                          | Undergraduate    | Primary sch.     | -1.183  | .589 | .262 | -2.79 | .43  |
|                                                          |                  | High-school      | -.083   | .079 | .830 | -.30  | .13  |
|                                                          |                  | Junior college   | .103    | .135 | .942 | -.27  | .47  |
|                                                          |                  | Master/doctorate | .358*   | .106 | .007 | .07   | .65  |
|                                                          | Master/doctorate | Primary sch.     | -1.541  | .595 | .073 | -3.17 | .09  |
|                                                          |                  | High-school      | -.441*  | .117 | .002 | -.76  | -.12 |
|                                                          |                  | Junior college   | -.255   | .160 | .505 | -.69  | .18  |
|                                                          |                  | Undergraduate    | -.358*  | .106 | .007 | -.65  | -.07 |
| *. The mean difference is significant at the 0.05 level. |                  |                  |         |      |      |       |      |

### 3.3. Risk perception and informing of coronavirus disease and education - Anova results with Post hoc

| ANOVA                     |                |                |     |             |       |      |
|---------------------------|----------------|----------------|-----|-------------|-------|------|
|                           |                | Sum of Squares | df  | Mean Square | F     | Sig. |
| Television                | Between Groups | 20.618         | 4   | 5.154       | 3.765 | .005 |
|                           | Within Groups  | 1328.053       | 970 | 1.369       |       |      |
|                           | Total          | 1348.671       | 974 |             |       |      |
| Radio                     | Between Groups | 33.434         | 4   | 8.358       | 7.312 | .000 |
|                           | Within Groups  | 1108.874       | 970 | 1.143       |       |      |
|                           | Total          | 1142.308       | 974 |             |       |      |
| Newspaper                 | Between Groups | 45.032         | 4   | 11.258      | 6.693 | .000 |
|                           | Within Groups  | 1631.516       | 970 | 1.682       |       |      |
|                           | Total          | 1676.548       | 974 |             |       |      |
| Internet                  | Between Groups | 5.214          | 4   | 1.303       | 1.345 | .251 |
|                           | Within Groups  | 940.239        | 970 | .969        |       |      |
|                           | Total          | 945.452        | 974 |             |       |      |
| Scientific journal        | Between Groups | 34.637         | 4   | 8.659       | 4.180 | .002 |
|                           | Within Groups  | 2009.646       | 970 | 2.072       |       |      |
|                           | Total          | 2044.283       | 974 |             |       |      |
| Local medical website     | Between Groups | 55.181         | 4   | 13.795      | 7.553 | .000 |
|                           | Within Groups  | 1771.736       | 970 | 1.827       |       |      |
|                           | Total          | 1826.917       | 974 |             |       |      |
| Addressing of a statesman | Between Groups | 30.063         | 4   | 7.516       | 5.044 | .001 |
|                           | Within Groups  | 1445.420       | 970 | 1.490       |       |      |
|                           | Total          | 1475.483       | 974 |             |       |      |

|                          |                |          |     |        |        |      |
|--------------------------|----------------|----------|-----|--------|--------|------|
| Addressing of an expert  | Between Groups | 8.114    | 4   | 2.028  | 2.864  | .022 |
|                          | Within Groups  | 687.019  | 970 | .708   |        |      |
|                          | Total          | 695.132  | 974 |        |        |      |
| The social network       | Between Groups | 12.333   | 4   | 3.083  | 1.554  | .185 |
|                          | Within Groups  | 1924.614 | 970 | 1.984  |        |      |
|                          | Total          | 1936.948 | 974 |        |        |      |
| Family members           | Between Groups | 44.882   | 4   | 11.220 | 7.468  | .000 |
|                          | Within Groups  | 1457.481 | 970 | 1.503  |        |      |
|                          | Total          | 1502.363 | 974 |        |        |      |
| Friends                  | Between Groups | 33.904   | 4   | 8.476  | 5.720  | .000 |
|                          | Within Groups  | 1437.426 | 970 | 1.482  |        |      |
|                          | Total          | 1471.329 | 974 |        |        |      |
| Local community          | Between Groups | 27.962   | 4   | 6.991  | 4.658  | .001 |
|                          | Within Groups  | 1455.847 | 970 | 1.501  |        |      |
|                          | Total          | 1483.809 | 974 |        |        |      |
| Chosen physician         | Between Groups | 54.340   | 4   | 13.585 | 8.275  | .000 |
|                          | Within Groups  | 1592.429 | 970 | 1.642  |        |      |
|                          | Total          | 1646.769 | 974 |        |        |      |
| First responders         | Between Groups | 47.992   | 4   | 11.998 | 6.375  | .000 |
|                          | Within Groups  | 1825.540 | 970 | 1.882  |        |      |
|                          | Total          | 1873.532 | 974 |        |        |      |
| Non-government org.      | Between Groups | 42.009   | 4   | 10.502 | 8.965  | .000 |
|                          | Within Groups  | 1136.299 | 970 | 1.171  |        |      |
|                          | Total          | 1178.308 | 974 |        |        |      |
| Educational institutions | Between Groups | 105.789  | 4   | 26.447 | 14.335 | .000 |

|  |               |          |     |       |  |  |
|--|---------------|----------|-----|-------|--|--|
|  | Within Groups | 1789.620 | 970 | 1.845 |  |  |
|  | Total         | 1895.409 | 974 |       |  |  |

| Multiple Comparisons |                  |                  |                       |            |      |                         |             |
|----------------------|------------------|------------------|-----------------------|------------|------|-------------------------|-------------|
| Tukey HSD            |                  |                  |                       |            |      |                         |             |
| Dependent Variable   | (I) Education    | (J) Education    | Mean Difference (I-J) | Std. Error | Sig. | 95% Confidence Interval |             |
|                      |                  |                  |                       |            |      | Lower Bound             | Upper Bound |
| Television           | Primary sch.     | High-school      | .950                  | .680       | .629 | -.91                    | 2.81        |
|                      |                  | Junior college   | 1.238                 | .691       | .380 | -.65                    | 3.13        |
|                      |                  | Undergraduate    | 1.124                 | .677       | .460 | -.73                    | 2.97        |
|                      |                  | Master/doctorate | 1.405                 | .685       | .242 | -.47                    | 3.28        |
|                      | High-school      | Primary sch.     | -.950                 | .680       | .629 | -2.81                   | .91         |
|                      |                  | Junior college   | .288                  | .166       | .410 | -.16                    | .74         |
|                      |                  | Undergraduate    | .174                  | .090       | .306 | -.07                    | .42         |
|                      |                  | Master/doctorate | .455*                 | .134       | .006 | .09                     | .82         |
|                      | Junior college   | Primary sch.     | -1.238                | .691       | .380 | -3.13                   | .65         |
|                      |                  | High-school      | -.288                 | .166       | .410 | -.74                    | .16         |
|                      |                  | Undergraduate    | -.114                 | .156       | .948 | -.54                    | .31         |
|                      |                  | Master/doctorate | .167                  | .185       | .894 | -.34                    | .67         |
|                      | Undergraduate    | Primary sch.     | -1.124                | .677       | .460 | -2.97                   | .73         |
|                      |                  | High-school      | -.174                 | .090       | .306 | -.42                    | .07         |
|                      |                  | Junior college   | .114                  | .156       | .948 | -.31                    | .54         |
|                      |                  | Master/doctorate | .282                  | .122       | .140 | -.05                    | .61         |
|                      | Master/doctorate | Primary sch.     | -1.405                | .685       | .242 | -3.28                   | .47         |
|                      |                  | High-school      | -.455*                | .134       | .006 | -.82                    | -.09        |
|                      |                  | Junior college   | -.167                 | .185       | .894 | -.67                    | .34         |
|                      |                  | Undergraduate    | -.282                 | .122       | .140 | -.61                    | .05         |
| Radio                | Primary sch.     | High-school      | 3.213*                | .621       | .000 | 1.51                    | 4.91        |
|                      |                  | Junior college   | 3.333*                | .632       | .000 | 1.61                    | 5.06        |
|                      |                  | Undergraduate    | 3.280*                | .619       | .000 | 1.59                    | 4.97        |
|                      |                  | Master/doctorate | 3.324*                | .626       | .000 | 1.61                    | 5.03        |
|                      | High-school      | Primary sch.     | -3.213*               | .621       | .000 | -4.91                   | -1.51       |
|                      |                  | Junior college   | .121                  | .151       | .931 | -.29                    | .53         |
|                      |                  | Undergraduate    | .067                  | .083       | .927 | -.16                    | .29         |
|                      |                  | Master/doctorate | .112                  | .123       | .893 | -.22                    | .45         |
|                      | Junior college   | Primary sch.     | -3.333*               | .632       | .000 | -5.06                   | -1.61       |
|                      |                  | High-school      | -.121                 | .151       | .931 | -.53                    | .29         |
|                      |                  | Undergraduate    | -.054                 | .142       | .996 | -.44                    | .33         |

|           |                  |                  |         |      |       |       |       |
|-----------|------------------|------------------|---------|------|-------|-------|-------|
|           | Undergraduate    | Master/doctorate | -.009   | .169 | 1.000 | -.47  | .45   |
|           |                  | Primary sch.     | -3.280* | .619 | .000  | -4.97 | -1.59 |
|           |                  | High-school      | -.067   | .083 | .927  | -.29  | .16   |
|           |                  | Junior college   | .054    | .142 | .996  | -.33  | .44   |
|           | Master/doctorate | Master/doctorate | .045    | .111 | .994  | -.26  | .35   |
|           |                  | Primary sch.     | -3.324* | .626 | .000  | -5.03 | -1.61 |
|           |                  | High-school      | -.112   | .123 | .893  | -.45  | .22   |
|           |                  | Junior college   | .009    | .169 | 1.000 | -.45  | .47   |
| Newspaper | Primary sch.     | Undergraduate    | -.045   | .111 | .994  | -.35  | .26   |
|           |                  | High-school      | 2.800*  | .753 | .002  | .74   | 4.86  |
|           |                  | Junior college   | 2.952*  | .766 | .001  | .86   | 5.05  |
|           |                  | Undergraduate    | 3.102*  | .751 | .000  | 1.05  | 5.15  |
|           | High-school      | Master/doctorate | 2.838*  | .759 | .002  | .76   | 4.91  |
|           |                  | Primary sch.     | -2.800* | .753 | .002  | -4.86 | -.74  |
|           |                  | Junior college   | .152    | .184 | .921  | -.35  | .65   |
|           |                  | Undergraduate    | .302*   | .100 | .022  | .03   | .58   |
|           | Junior college   | Master/doctorate | .038    | .149 | .999  | -.37  | .44   |
|           |                  | Primary sch.     | -2.952* | .766 | .001  | -5.05 | -.86  |
|           |                  | High-school      | -.152   | .184 | .921  | -.65  | .35   |
|           |                  | Undergraduate    | .150    | .172 | .908  | -.32  | .62   |
|           | Undergraduate    | Master/doctorate | -.115   | .205 | .981  | -.67  | .44   |
|           |                  | Primary sch.     | -3.102* | .751 | .000  | -5.15 | -1.05 |
|           |                  | High-school      | -.302*  | .100 | .022  | -.58  | -.03  |
|           |                  | Junior college   | -.150   | .172 | .908  | -.62  | .32   |
|           | Master/doctorate | Master/doctorate | -.264   | .135 | .286  | -.63  | .10   |
|           |                  | Primary sch.     | -2.838* | .759 | .002  | -4.91 | -.76  |
|           |                  | High-school      | -.038   | .149 | .999  | -.44  | .37   |
|           |                  | Junior college   | .115    | .205 | .981  | -.44  | .67   |
| Internet  | Primary sch.     | Undergraduate    | .264    | .135 | .286  | -.10  | .63   |
|           |                  | High-school      | .875    | .572 | .543  | -.69  | 2.44  |
|           |                  | Junior college   | .762    | .582 | .685  | -.83  | 2.35  |
|           |                  | Undergraduate    | .747    | .570 | .684  | -.81  | 2.30  |
|           | High-school      | Master/doctorate | .703    | .576 | .740  | -.87  | 2.28  |
|           |                  | Primary sch.     | -.875   | .572 | .543  | -2.44 | .69   |
|           |                  | Junior college   | -.113   | .139 | .927  | -.49  | .27   |
|           |                  | Undergraduate    | -.128   | .076 | .447  | -.34  | .08   |
|           | Junior college   | Master/doctorate | -.172   | .113 | .547  | -.48  | .14   |
|           |                  | Primary sch.     | -.762   | .582 | .685  | -2.35 | .83   |
|           |                  | High-school      | .113    | .139 | .927  | -.27  | .49   |
|           |                  | Undergraduate    | -.015   | .131 | 1.000 | -.37  | .34   |
|           | Undergraduate    | Master/doctorate | -.059   | .155 | .996  | -.48  | .37   |
|           |                  | Primary sch.     | -.747   | .570 | .684  | -2.30 | .81   |

|                       |                  |                  |         |      |       |       |      |
|-----------------------|------------------|------------------|---------|------|-------|-------|------|
|                       |                  | High-school      | .128    | .076 | .447  | -.08  | .34  |
|                       |                  | Junior college   | .015    | .131 | 1.000 | -.34  | .37  |
|                       |                  | Master/doctorate | -.045   | .102 | .992  | -.32  | .24  |
|                       | Master/doctorate | Primary sch.     | -.703   | .576 | .740  | -2.28 | .87  |
|                       |                  | High-school      | .172    | .113 | .547  | -.14  | .48  |
|                       |                  | Junior college   | .059    | .155 | .996  | -.37  | .48  |
|                       |                  | Undergraduate    | .045    | .102 | .992  | -.24  | .32  |
| Scientific journal    | Primary sch.     | High-school      | 2.675*  | .836 | .012  | .39   | 4.96 |
|                       |                  | Junior college   | 3.095*  | .851 | .003  | .77   | 5.42 |
|                       |                  | Undergraduate    | 2.667*  | .833 | .012  | .39   | 4.94 |
|                       |                  | Master/doctorate | 2.541*  | .842 | .022  | .24   | 4.84 |
|                       | High-school      | Primary sch.     | -2.675* | .836 | .012  | -4.96 | -.39 |
|                       |                  | Junior college   | .420    | .204 | .237  | -.14  | .98  |
|                       |                  | Undergraduate    | -.008   | .111 | 1.000 | -.31  | .30  |
|                       |                  | Master/doctorate | -.134   | .165 | .926  | -.59  | .32  |
|                       | Junior college   | Primary sch.     | -3.095* | .851 | .003  | -5.42 | -.77 |
|                       |                  | High-school      | -.420   | .204 | .237  | -.98  | .14  |
|                       |                  | Undergraduate    | -.429   | .191 | .166  | -.95  | .09  |
|                       |                  | Master/doctorate | -.555   | .227 | .105  | -1.18 | .07  |
|                       | Undergraduate    | Primary sch.     | -2.667* | .833 | .012  | -4.94 | -.39 |
|                       |                  | High-school      | .008    | .111 | 1.000 | -.30  | .31  |
|                       |                  | Junior college   | .429    | .191 | .166  | -.09  | .95  |
|                       |                  | Master/doctorate | -.126   | .150 | .917  | -.53  | .28  |
|                       | Master/doctorate | Primary sch.     | -2.541* | .842 | .022  | -4.84 | -.24 |
|                       |                  | High-school      | .134    | .165 | .926  | -.32  | .59  |
|                       |                  | Junior college   | .555    | .227 | .105  | -.07  | 1.18 |
|                       |                  | Undergraduate    | .126    | .150 | .917  | -.28  | .53  |
| Local medical website | Primary sch.     | High-school      | 2.538*  | .785 | .011  | .39   | 4.68 |
|                       |                  | Junior college   | 3.000*  | .799 | .002  | .82   | 5.18 |
|                       |                  | Undergraduate    | 2.414*  | .782 | .018  | .28   | 4.55 |
|                       |                  | Master/doctorate | 2.892*  | .791 | .002  | .73   | 5.05 |
|                       | High-school      | Primary sch.     | -2.538* | .785 | .011  | -4.68 | -.39 |
|                       |                  | Junior college   | .462    | .191 | .111  | -.06  | .99  |
|                       |                  | Undergraduate    | -.124   | .104 | .761  | -.41  | .16  |
|                       |                  | Master/doctorate | .354    | .155 | .151  | -.07  | .78  |
|                       | Junior college   | Primary sch.     | -3.000* | .799 | .002  | -5.18 | -.82 |
|                       |                  | High-school      | -.462   | .191 | .111  | -.99  | .06  |
|                       |                  | Undergraduate    | -.586*  | .180 | .010  | -1.08 | -.10 |
|                       |                  | Master/doctorate | -.108   | .213 | .987  | -.69  | .47  |
|                       | Undergraduate    | Primary sch.     | -2.414* | .782 | .018  | -4.55 | -.28 |
|                       |                  | High-school      | .124    | .104 | .761  | -.16  | .41  |
|                       |                  | Junior college   | .586*   | .180 | .010  | .10   | 1.08 |

|                              |                  |                  |         |      |      |       |      |
|------------------------------|------------------|------------------|---------|------|------|-------|------|
|                              | Master/doctorate | Master/doctorate | .478*   | .140 | .006 | .09   | .86  |
|                              |                  | Primary sch.     | -2.892* | .791 | .002 | -5.05 | -.73 |
|                              |                  | High-school      | -.354   | .155 | .151 | -.78  | .07  |
|                              |                  | Junior college   | .108    | .213 | .987 | -.47  | .69  |
| Addressing of a<br>statesman | Primary sch.     | Undergraduate    | -.478*  | .140 | .006 | -.86  | -.09 |
|                              |                  | High-school      | .987    | .709 | .633 | -.95  | 2.93 |
|                              |                  | Junior college   | 1.381   | .721 | .310 | -.59  | 3.35 |
|                              |                  | Undergraduate    | 1.086   | .707 | .539 | -.85  | 3.02 |
|                              | High-school      | Master/doctorate | 1.514   | .714 | .213 | -.44  | 3.47 |
|                              |                  | Primary sch.     | -.987   | .709 | .633 | -2.93 | .95  |
|                              |                  | Junior college   | .393    | .173 | .153 | -.08  | .87  |
|                              |                  | Undergraduate    | .099    | .094 | .834 | -.16  | .36  |
|                              |                  | Master/doctorate | .526*   | .140 | .002 | .14   | .91  |
|                              | Junior college   | Primary sch.     | -1.381  | .721 | .310 | -3.35 | .59  |
|                              |                  | High-school      | -.393   | .173 | .153 | -.87  | .08  |
|                              |                  | Undergraduate    | -.295   | .162 | .364 | -.74  | .15  |
|                              |                  | Master/doctorate | .133    | .193 | .959 | -.39  | .66  |
|                              | Undergraduate    | Primary sch.     | -1.086  | .707 | .539 | -3.02 | .85  |
|                              |                  | High-school      | -.099   | .094 | .834 | -.36  | .16  |
|                              |                  | Junior college   | .295    | .162 | .364 | -.15  | .74  |
|                              |                  | Master/doctorate | .427*   | .127 | .007 | .08   | .77  |
|                              | Master/doctorate | Primary sch.     | -1.514  | .714 | .213 | -3.47 | .44  |
|                              |                  | High-school      | -.526*  | .140 | .002 | -.91  | -.14 |
|                              |                  | Junior college   | -.133   | .193 | .959 | -.66  | .39  |
|                              |                  | Undergraduate    | -.427*  | .127 | .007 | -.77  | -.08 |
| Addressing of an<br>expert   | Primary sch.     | High-school      | .650    | .489 | .673 | -.69  | 1.99 |
|                              |                  | Junior college   | .857    | .497 | .420 | -.50  | 2.22 |
|                              |                  | Undergraduate    | .602    | .487 | .730 | -.73  | 1.93 |
|                              |                  | Master/doctorate | .811    | .492 | .468 | -.53  | 2.16 |
|                              | High-school      | Primary sch.     | -.650   | .489 | .673 | -1.99 | .69  |
|                              |                  | Junior college   | .207    | .119 | .411 | -.12  | .53  |
|                              |                  | Undergraduate    | -.048   | .065 | .948 | -.23  | .13  |
|                              |                  | Master/doctorate | .161    | .097 | .456 | -.10  | .42  |
|                              | Junior college   | Primary sch.     | -.857   | .497 | .420 | -2.22 | .50  |
|                              |                  | High-school      | -.207   | .119 | .411 | -.53  | .12  |
|                              |                  | Undergraduate    | -.255   | .112 | .152 | -.56  | .05  |
|                              |                  | Master/doctorate | -.046   | .133 | .997 | -.41  | .32  |
|                              | Undergraduate    | Primary sch.     | -.602   | .487 | .730 | -1.93 | .73  |
|                              |                  | High-school      | .048    | .065 | .948 | -.13  | .23  |
|                              |                  | Junior college   | .255    | .112 | .152 | -.05  | .56  |
|                              |                  | Master/doctorate | .209    | .087 | .120 | -.03  | .45  |
|                              | Master/doctorate | Primary sch.     | -.811   | .492 | .468 | -2.16 | .53  |

|                    |                  |                  |         |      |      |       |      |
|--------------------|------------------|------------------|---------|------|------|-------|------|
|                    |                  | High-school      | -.161   | .097 | .456 | -.42  | .10  |
|                    |                  | Junior college   | .046    | .133 | .997 | -.32  | .41  |
|                    |                  | Undergraduate    | -.209   | .087 | .120 | -.45  | .03  |
| The social network | Primary sch.     | High-school      | 1.850   | .818 | .159 | -.39  | 4.09 |
|                    |                  | Junior college   | 2.000   | .832 | .115 | -.27  | 4.27 |
|                    |                  | Undergraduate    | 1.909   | .815 | .133 | -.32  | 4.14 |
|                    |                  | Master/doctorate | 1.946   | .824 | .127 | -.31  | 4.20 |
|                    | High-school      | Primary sch.     | -1.850  | .818 | .159 | -4.09 | .39  |
|                    |                  | Junior college   | .150    | .199 | .944 | -.39  | .69  |
|                    |                  | Undergraduate    | .059    | .109 | .983 | -.24  | .36  |
|                    |                  | Master/doctorate | .096    | .162 | .976 | -.35  | .54  |
|                    | Junior college   | Primary sch.     | -2.000  | .832 | .115 | -4.27 | .27  |
|                    |                  | High-school      | -.150   | .199 | .944 | -.69  | .39  |
|                    |                  | Undergraduate    | -.091   | .187 | .988 | -.60  | .42  |
|                    |                  | Master/doctorate | -.054   | .222 | .999 | -.66  | .55  |
|                    | Undergraduate    | Primary sch.     | -1.909  | .815 | .133 | -4.14 | .32  |
|                    |                  | High-school      | -.059   | .109 | .983 | -.36  | .24  |
|                    |                  | Junior college   | .091    | .187 | .988 | -.42  | .60  |
|                    |                  | Master/doctorate | .037    | .146 | .999 | -.36  | .44  |
|                    | Master/doctorate | Primary sch.     | -1.946  | .824 | .127 | -4.20 | .31  |
|                    |                  | High-school      | -.096   | .162 | .976 | -.54  | .35  |
|                    |                  | Junior college   | .054    | .222 | .999 | -.55  | .66  |
|                    |                  | Undergraduate    | -.037   | .146 | .999 | -.44  | .36  |
| Family members     | Primary sch.     | High-school      | 1.650   | .712 | .140 | -.30  | 3.60 |
|                    |                  | Junior college   | 1.762   | .724 | .108 | -.22  | 3.74 |
|                    |                  | Undergraduate    | 1.962*  | .710 | .046 | .02   | 3.90 |
|                    |                  | Master/doctorate | 1.432   | .717 | .268 | -.53  | 3.39 |
|                    | High-school      | Primary sch.     | -1.650  | .712 | .140 | -3.60 | .30  |
|                    |                  | Junior college   | .112    | .174 | .968 | -.36  | .59  |
|                    |                  | Undergraduate    | .312*   | .095 | .009 | .05   | .57  |
|                    |                  | Master/doctorate | -.218   | .141 | .533 | -.60  | .17  |
|                    | Junior college   | Primary sch.     | -1.762  | .724 | .108 | -3.74 | .22  |
|                    |                  | High-school      | -.112   | .174 | .968 | -.59  | .36  |
|                    |                  | Undergraduate    | .200    | .163 | .734 | -.24  | .65  |
|                    |                  | Master/doctorate | -.329   | .193 | .432 | -.86  | .20  |
|                    | Undergraduate    | Primary sch.     | -1.962* | .710 | .046 | -3.90 | -.02 |
|                    |                  | High-school      | -.312*  | .095 | .009 | -.57  | -.05 |
|                    |                  | Junior college   | -.200   | .163 | .734 | -.65  | .24  |
|                    |                  | Master/doctorate | -.530*  | .127 | .000 | -.88  | -.18 |
|                    | Master/doctorate | Primary sch.     | -1.432  | .717 | .268 | -3.39 | .53  |
|                    |                  | High-school      | .218    | .141 | .533 | -.17  | .60  |
|                    |                  | Junior college   | .329    | .193 | .432 | -.20  | .86  |

|                  |                  |                  |         |      |       |       |      |
|------------------|------------------|------------------|---------|------|-------|-------|------|
|                  |                  | Undergraduate    | .530*   | .127 | .000  | .18   | .88  |
| Friends          | Primary sch.     | High-school      | 1.700   | .707 | .115  | -.23  | 3.63 |
|                  |                  | Junior college   | 1.810   | .719 | .088  | -.16  | 3.78 |
|                  |                  | Undergraduate    | 2.032*  | .705 | .033  | .11   | 3.96 |
|                  |                  | Master/doctorate | 1.730   | .712 | .109  | -.22  | 3.68 |
|                  | High-school      | Primary sch.     | -1.700  | .707 | .115  | -3.63 | .23  |
|                  |                  | Junior college   | .110    | .172 | .969  | -.36  | .58  |
|                  |                  | Undergraduate    | .332*   | .094 | .004  | .08   | .59  |
|                  |                  | Master/doctorate | .030    | .140 | 1.000 | -.35  | .41  |
|                  | Junior college   | Primary sch.     | -1.810  | .719 | .088  | -3.78 | .16  |
|                  |                  | High-school      | -.110   | .172 | .969  | -.58  | .36  |
|                  |                  | Undergraduate    | .223    | .162 | .643  | -.22  | .66  |
|                  |                  | Master/doctorate | -.080   | .192 | .994  | -.60  | .44  |
|                  | Undergraduate    | Primary sch.     | -2.032* | .705 | .033  | -3.96 | -.11 |
|                  |                  | High-school      | -.332*  | .094 | .004  | -.59  | -.08 |
|                  |                  | Junior college   | -.223   | .162 | .643  | -.66  | .22  |
|                  |                  | Master/doctorate | -.303   | .127 | .119  | -.65  | .04  |
|                  | Master/doctorate | Primary sch.     | -1.730  | .712 | .109  | -3.68 | .22  |
|                  |                  | High-school      | -.030   | .140 | 1.000 | -.41  | .35  |
|                  |                  | Junior college   | .080    | .192 | .994  | -.44  | .60  |
|                  |                  | Undergraduate    | .303    | .127 | .119  | -.04  | .65  |
| Local community  | Primary sch.     | High-school      | 2.700*  | .712 | .001  | .75   | 4.65 |
|                  |                  | Junior college   | 2.952*  | .724 | .000  | .97   | 4.93 |
|                  |                  | Undergraduate    | 2.780*  | .709 | .001  | .84   | 4.72 |
|                  |                  | Master/doctorate | 2.892*  | .717 | .001  | .93   | 4.85 |
|                  | High-school      | Primary sch.     | -2.700* | .712 | .001  | -4.65 | -.75 |
|                  |                  | Junior college   | .252    | .173 | .592  | -.22  | .73  |
|                  |                  | Undergraduate    | .080    | .095 | .918  | -.18  | .34  |
|                  |                  | Master/doctorate | .192    | .141 | .651  | -.19  | .58  |
|                  | Junior college   | Primary sch.     | -2.952* | .724 | .000  | -4.93 | -.97 |
|                  |                  | High-school      | -.252   | .173 | .592  | -.73  | .22  |
|                  |                  | Undergraduate    | -.173   | .163 | .826  | -.62  | .27  |
|                  |                  | Master/doctorate | -.060   | .193 | .998  | -.59  | .47  |
|                  | Undergraduate    | Primary sch.     | -2.780* | .709 | .001  | -4.72 | -.84 |
|                  |                  | High-school      | -.080   | .095 | .918  | -.34  | .18  |
|                  |                  | Junior college   | .173    | .163 | .826  | -.27  | .62  |
|                  |                  | Master/doctorate | .112    | .127 | .903  | -.24  | .46  |
|                  | Master/doctorate | Primary sch.     | -2.892* | .717 | .001  | -4.85 | -.93 |
|                  |                  | High-school      | -.192   | .141 | .651  | -.58  | .19  |
|                  |                  | Junior college   | .060    | .193 | .998  | -.47  | .59  |
|                  |                  | Undergraduate    | -.112   | .127 | .903  | -.46  | .24  |
| Chosen physician | Primary sch.     | High-school      | 2.763*  | .744 | .002  | .73   | 4.80 |

|                     |                  |                  |         |      |       |       |       |
|---------------------|------------------|------------------|---------|------|-------|-------|-------|
|                     |                  | Junior college   | 3.286*  | .757 | .000  | 1.22  | 5.35  |
|                     |                  | Undergraduate    | 3.065*  | .742 | .000  | 1.04  | 5.09  |
|                     |                  | Master/doctorate | 3.243*  | .750 | .000  | 1.19  | 5.29  |
|                     | High-school      | Primary sch.     | -2.763* | .744 | .002  | -4.80 | -.73  |
|                     |                  | Junior college   | .523*   | .181 | .033  | .03   | 1.02  |
|                     |                  | Undergraduate    | .302*   | .099 | .020  | .03   | .57   |
|                     |                  | Master/doctorate | .481*   | .147 | .010  | .08   | .88   |
|                     | Junior college   | Primary sch.     | -3.286* | .757 | .000  | -5.35 | -1.22 |
|                     |                  | High-school      | -.523*  | .181 | .033  | -1.02 | -.03  |
|                     |                  | Undergraduate    | -.221   | .170 | .692  | -.69  | .24   |
|                     |                  | Master/doctorate | -.042   | .202 | 1.000 | -.59  | .51   |
|                     | Undergraduate    | Primary sch.     | -3.065* | .742 | .000  | -5.09 | -1.04 |
|                     |                  | High-school      | -.302*  | .099 | .020  | -.57  | -.03  |
|                     |                  | Junior college   | .221    | .170 | .692  | -.24  | .69   |
|                     |                  | Master/doctorate | .179    | .133 | .665  | -.19  | .54   |
|                     | Master/doctorate | Primary sch.     | -3.243* | .750 | .000  | -5.29 | -1.19 |
|                     |                  | High-school      | -.481*  | .147 | .010  | -.88  | -.08  |
|                     |                  | Junior college   | .042    | .202 | 1.000 | -.51  | .59   |
|                     |                  | Undergraduate    | -.179   | .133 | .665  | -.54  | .19   |
| First responders    | Primary sch.     | High-school      | 2.425*  | .797 | .020  | .25   | 4.60  |
|                     |                  | Junior college   | 2.857*  | .811 | .004  | .64   | 5.07  |
|                     |                  | Undergraduate    | 2.500*  | .794 | .015  | .33   | 4.67  |
|                     |                  | Master/doctorate | 2.946*  | .803 | .002  | .75   | 5.14  |
|                     | High-school      | Primary sch.     | -2.425* | .797 | .020  | -4.60 | -.25  |
|                     |                  | Junior college   | .432    | .194 | .171  | -.10  | .96   |
|                     |                  | Undergraduate    | .075    | .106 | .955  | -.21  | .36   |
|                     |                  | Master/doctorate | .521*   | .157 | .009  | .09   | .95   |
|                     | Junior college   | Primary sch.     | -2.857* | .811 | .004  | -5.07 | -.64  |
|                     |                  | High-school      | -.432   | .194 | .171  | -.96  | .10   |
|                     |                  | Undergraduate    | -.357   | .182 | .287  | -.86  | .14   |
|                     |                  | Master/doctorate | .089    | .216 | .994  | -.50  | .68   |
|                     | Undergraduate    | Primary sch.     | -2.500* | .794 | .015  | -4.67 | -.33  |
|                     |                  | High-school      | -.075   | .106 | .955  | -.36  | .21   |
|                     |                  | Junior college   | .357    | .182 | .287  | -.14  | .86   |
|                     |                  | Master/doctorate | .446*   | .143 | .016  | .06   | .84   |
|                     | Master/doctorate | Primary sch.     | -2.946* | .803 | .002  | -5.14 | -.75  |
|                     |                  | High-school      | -.521*  | .157 | .009  | -.95  | -.09  |
|                     |                  | Junior college   | -.089   | .216 | .994  | -.68  | .50   |
|                     |                  | Undergraduate    | -.446*  | .143 | .016  | -.84  | -.06  |
| Non-government org. | Primary sch.     | High-school      | 3.075*  | .629 | .000  | 1.36  | 4.79  |
|                     |                  | Junior college   | 3.286*  | .640 | .000  | 1.54  | 5.03  |
|                     |                  | Undergraduate    | 3.108*  | .627 | .000  | 1.40  | 4.82  |

|                                                          |                  |                  |         |      |      |       |       |
|----------------------------------------------------------|------------------|------------------|---------|------|------|-------|-------|
|                                                          |                  | Master/doctorate | 3.432*  | .633 | .000 | 1.70  | 5.16  |
|                                                          | High-school      | Primary sch.     | -3.075* | .629 | .000 | -4.79 | -1.36 |
|                                                          |                  | Junior college   | .211    | .153 | .644 | -.21  | .63   |
|                                                          |                  | Undergraduate    | .033    | .084 | .995 | -.20  | .26   |
|                                                          |                  | Master/doctorate | .357*   | .124 | .033 | .02   | .70   |
|                                                          | Junior college   | Primary sch.     | -3.286* | .640 | .000 | -5.03 | -1.54 |
|                                                          |                  | High-school      | -.211   | .153 | .644 | -.63  | .21   |
|                                                          |                  | Undergraduate    | -.178   | .144 | .729 | -.57  | .21   |
|                                                          |                  | Master/doctorate | .147    | .171 | .912 | -.32  | .61   |
|                                                          | Undergraduate    | Primary sch.     | -3.108* | .627 | .000 | -4.82 | -1.40 |
|                                                          |                  | High-school      | -.033   | .084 | .995 | -.26  | .20   |
|                                                          |                  | Junior college   | .178    | .144 | .729 | -.21  | .57   |
|                                                          |                  | Master/doctorate | .325*   | .112 | .032 | .02   | .63   |
|                                                          | Master/doctorate | Primary sch.     | -3.432* | .633 | .000 | -5.16 | -1.70 |
|                                                          |                  | High-school      | -.357*  | .124 | .033 | -.70  | -.02  |
|                                                          |                  | Junior college   | -.147   | .171 | .912 | -.61  | .32   |
| Undergraduate                                            |                  | -.325*           | .112    | .032 | -.63 | -.02  |       |
| Educational institutions                                 | Primary sch.     | High-school      | 2.288*  | .789 | .031 | .13   | 4.44  |
|                                                          |                  | Junior college   | 3.286*  | .803 | .000 | 1.09  | 5.48  |
|                                                          |                  | Undergraduate    | 2.086   | .786 | .062 | -.06  | 4.23  |
|                                                          |                  | Master/doctorate | 2.514*  | .795 | .014 | .34   | 4.69  |
|                                                          | High-school      | Primary sch.     | -2.288* | .789 | .031 | -4.44 | -.13  |
|                                                          |                  | Junior college   | .998*   | .192 | .000 | .47   | 1.52  |
|                                                          |                  | Undergraduate    | -.201   | .105 | .306 | -.49  | .09   |
|                                                          |                  | Master/doctorate | .226    | .156 | .596 | -.20  | .65   |
|                                                          | Junior college   | Primary sch.     | -3.286* | .803 | .000 | -5.48 | -1.09 |
|                                                          |                  | High-school      | -.998*  | .192 | .000 | -1.52 | -.47  |
|                                                          |                  | Undergraduate    | -1.200* | .181 | .000 | -1.69 | -.71  |
|                                                          |                  | Master/doctorate | -.772*  | .214 | .003 | -1.36 | -.19  |
|                                                          | Undergraduate    | Primary sch.     | -2.086  | .786 | .062 | -4.23 | .06   |
|                                                          |                  | High-school      | .201    | .105 | .306 | -.09  | .49   |
|                                                          |                  | Junior college   | 1.200*  | .181 | .000 | .71   | 1.69  |
|                                                          |                  | Master/doctorate | .427*   | .141 | .021 | .04   | .81   |
|                                                          | Master/doctorate | Primary sch.     | -2.514* | .795 | .014 | -4.69 | -.34  |
|                                                          |                  | High-school      | -.226   | .156 | .596 | -.65  | .20   |
|                                                          |                  | Junior college   | .772*   | .214 | .003 | .19   | 1.36  |
|                                                          |                  | Undergraduate    | -.427*  | .141 | .021 | -.81  | -.04  |
| *. The mean difference is significant at the 0.05 level. |                  |                  |         |      |      |       |       |

**Table 6.** One-way ANOVA results of psychological behaviours of citizens and gender, education level, and age the variables on the risk perception of coronavirus disease.

| ANOVA                     |                |                |     |             |       |      |
|---------------------------|----------------|----------------|-----|-------------|-------|------|
|                           |                | Sum of Squares | df  | Mean Square | F     | Sig. |
| The likelihood of infect. | Between Groups | 12.697         | 4   | 3.174       | 2.523 | .040 |
|                           | Within Groups  | 1220.294       | 970 | 1.258       |       |      |
|                           | Total          | 1232.991       | 974 |             |       |      |
| Respiratory problems      | Between Groups | 26.237         | 4   | 6.559       | 5.597 | .000 |
|                           | Within Groups  | 1136.840       | 970 | 1.172       |       |      |
|                           | Total          | 1163.077       | 974 |             |       |      |
| Most severe symptoms      | Between Groups | 3.555          | 4   | .889        | 1.633 | .164 |
|                           | Within Groups  | 527.916        | 970 | .544        |       |      |
|                           | Total          | 531.471        | 974 |             |       |      |
| Serious health            | Between Groups | 21.300         | 4   | 5.325       | 5.064 | .000 |
|                           | Within Groups  | 1019.968       | 970 | 1.052       |       |      |
|                           | Total          | 1041.268       | 974 |             |       |      |
| Kindergarten or school    | Between Groups | 5.019          | 4   | 1.255       | 2.311 | .056 |
|                           | Within Groups  | 526.673        | 970 | .543        |       |      |
|                           | Total          | 531.692        | 974 |             |       |      |
| A place of greater risk   | Between Groups | 42.891         | 4   | 10.723      | 4.857 | .001 |
|                           | Within Groups  | 2141.238       | 970 | 2.207       |       |      |
|                           | Total          | 2184.129       | 974 |             |       |      |
| Losing my job             | Between Groups | 24.498         | 4   | 6.124       | 2.782 | .026 |
|                           | Within Groups  | 2135.373       | 970 | 2.201       |       |      |
|                           | Total          | 2159.871       | 974 |             |       |      |

|                        |                |          |     |        |       |      |
|------------------------|----------------|----------|-----|--------|-------|------|
| Prevent behavior       | Between Groups | 9.960    | 4   | 2.490  | 4.240 | .002 |
|                        | Within Groups  | 569.677  | 970 | .587   |       |      |
|                        | Total          | 579.637  | 974 |        |       |      |
| The responsibility     | Between Groups | 9.872    | 4   | 2.468  | 4.346 | .002 |
|                        | Within Groups  | 550.897  | 970 | .568   |       |      |
|                        | Total          | 560.769  | 974 |        |       |      |
| Respecting measures    | Between Groups | 62.022   | 4   | 15.505 | 9.021 | .000 |
|                        | Within Groups  | 1667.326 | 970 | 1.719  |       |      |
|                        | Total          | 1729.348 | 974 |        |       |      |
| Information critically | Between Groups | 11.614   | 4   | 2.904  | 2.712 | .029 |
|                        | Within Groups  | 1038.386 | 970 | 1.071  |       |      |
|                        | Total          | 1050.000 | 974 |        |       |      |
| I'm afraid of health   | Between Groups | 9.338    | 4   | 2.334  | 2.219 | .065 |
|                        | Within Groups  | 1020.354 | 970 | 1.052  |       |      |
|                        | Total          | 1029.692 | 974 |        |       |      |
| Econ. consequences     | Between Groups | 6.355    | 4   | 1.589  | 1.800 | .127 |
|                        | Within Groups  | 856.205  | 970 | .883   |       |      |
|                        | Total          | 862.560  | 974 |        |       |      |
| Fear of restrictions   | Between Groups | 21.920   | 4   | 5.480  | 3.178 | .013 |
|                        | Within Groups  | 1672.850 | 970 | 1.725  |       |      |
|                        | Total          | 1694.769 | 974 |        |       |      |

| Multiple Comparisons |               |               |                       |            |      |                         |             |
|----------------------|---------------|---------------|-----------------------|------------|------|-------------------------|-------------|
| Tukey HSD            |               |               |                       |            |      |                         |             |
| Dependent Variable   | (I) Education | (J) Education | Mean Difference (I-J) | Std. Error | Sig. | 95% Confidence Interval |             |
|                      |               |               |                       |            |      | Lower Bound             | Upper Bound |

|                           |                  |                  |         |      |       |       |      |
|---------------------------|------------------|------------------|---------|------|-------|-------|------|
| The likelihood of infect. | Primary sch.     | High-school      | 2.013*  | .652 | .018  | .23   | 3.79 |
|                           |                  | Junior college   | 2.095*  | .663 | .014  | .28   | 3.91 |
|                           |                  | Undergraduate    | 1.995*  | .649 | .019  | .22   | 3.77 |
|                           |                  | Master/doctorate | 1.973*  | .656 | .023  | .18   | 3.77 |
|                           | High-school      | Primary sch.     | -2.013* | .652 | .018  | -3.79 | -.23 |
|                           |                  | Junior college   | .083    | .159 | .985  | -.35  | .52  |
|                           |                  | Undergraduate    | -.018   | .087 | 1.000 | -.25  | .22  |
|                           |                  | Master/doctorate | -.040   | .129 | .998  | -.39  | .31  |
|                           | Junior college   | Primary sch.     | -2.095* | .663 | .014  | -3.91 | -.28 |
|                           |                  | High-school      | -.083   | .159 | .985  | -.52  | .35  |
|                           |                  | Undergraduate    | -.101   | .149 | .962  | -.51  | .31  |
|                           |                  | Master/doctorate | -.122   | .177 | .958  | -.61  | .36  |
|                           | Undergraduate    | Primary sch.     | -1.995* | .649 | .019  | -3.77 | -.22 |
|                           |                  | High-school      | .018    | .087 | 1.000 | -.22  | .25  |
|                           |                  | Junior college   | .101    | .149 | .962  | -.31  | .51  |
|                           |                  | Master/doctorate | -.022   | .117 | 1.000 | -.34  | .30  |
|                           | Master/doctorate | Primary sch.     | -1.973* | .656 | .023  | -3.77 | -.18 |
|                           |                  | High-school      | .040    | .129 | .998  | -.31  | .39  |
|                           |                  | Junior college   | .122    | .177 | .958  | -.36  | .61  |
|                           |                  | Undergraduate    | .022    | .117 | 1.000 | -.30  | .34  |
| Respiratory problems      | Primary sch.     | High-school      | 1.413   | .629 | .164  | -.31  | 3.13 |
|                           |                  | Junior college   | 1.857*  | .640 | .031  | .11   | 3.61 |
|                           |                  | Undergraduate    | 1.651   | .627 | .065  | -.06  | 3.36 |
|                           |                  | Master/doctorate | 1.378   | .633 | .190  | -.35  | 3.11 |
|                           | High-school      | Primary sch.     | -1.413  | .629 | .164  | -3.13 | .31  |
|                           |                  | Junior college   | .445*   | .153 | .031  | .03   | .86  |
|                           |                  | Undergraduate    | .238*   | .084 | .036  | .01   | .47  |
|                           |                  | Master/doctorate | -.034   | .124 | .999  | -.37  | .31  |
|                           | Junior college   | Primary sch.     | -1.857* | .640 | .031  | -3.61 | -.11 |
|                           |                  | High-school      | -.445*  | .153 | .031  | -.86  | -.03 |
|                           |                  | Undergraduate    | -.207   | .144 | .605  | -.60  | .19  |
|                           |                  | Master/doctorate | -.479*  | .171 | .041  | -.95  | -.01 |
|                           | Undergraduate    | Primary sch.     | -1.651  | .627 | .065  | -3.36 | .06  |
|                           |                  | High-school      | -.238*  | .084 | .036  | -.47  | -.01 |
|                           |                  | Junior college   | .207    | .144 | .605  | -.19  | .60  |
|                           |                  | Master/doctorate | -.272   | .113 | .111  | -.58  | .04  |
|                           | Master/doctorate | Primary sch.     | -1.378  | .633 | .190  | -3.11 | .35  |
|                           |                  | High-school      | .034    | .124 | .999  | -.31  | .37  |
|                           |                  | Junior college   | .479*   | .171 | .041  | .01   | .95  |
|                           |                  | Undergraduate    | .272    | .113 | .111  | -.04  | .58  |
| Most severe symptoms      | Primary sch.     | High-school      | .463    | .429 | .817  | -.71  | 1.63 |
|                           |                  | Junior college   | .476    | .436 | .811  | -.72  | 1.67 |

|                        |                  |                  |         |      |       |       |      |
|------------------------|------------------|------------------|---------|------|-------|-------|------|
|                        |                  | Undergraduate    | .522    | .427 | .739  | -.65  | 1.69 |
|                        |                  | Master/doctorate | .351    | .432 | .926  | -.83  | 1.53 |
|                        | High-school      | Primary sch.     | -.463   | .429 | .817  | -1.63 | .71  |
|                        |                  | Junior college   | .014    | .104 | 1.000 | -.27  | .30  |
|                        |                  | Undergraduate    | .059    | .057 | .839  | -.10  | .21  |
|                        |                  | Master/doctorate | -.111   | .085 | .683  | -.34  | .12  |
|                        | Junior college   | Primary sch.     | -.476   | .436 | .811  | -1.67 | .72  |
|                        |                  | High-school      | -.014   | .104 | 1.000 | -.30  | .27  |
|                        |                  | Undergraduate    | .045    | .098 | .991  | -.22  | .31  |
|                        |                  | Master/doctorate | -.125   | .116 | .821  | -.44  | .19  |
|                        | Undergraduate    | Primary sch.     | -.522   | .427 | .739  | -1.69 | .65  |
|                        |                  | High-school      | -.059   | .057 | .839  | -.21  | .10  |
|                        |                  | Junior college   | -.045   | .098 | .991  | -.31  | .22  |
|                        |                  | Master/doctorate | -.170   | .077 | .173  | -.38  | .04  |
|                        | Master/doctorate | Primary sch.     | -.351   | .432 | .926  | -1.53 | .83  |
|                        |                  | High-school      | .111    | .085 | .683  | -.12  | .34  |
|                        |                  | Junior college   | .125    | .116 | .821  | -.19  | .44  |
|                        |                  | Undergraduate    | .170    | .077 | .173  | -.04  | .38  |
| Serious health         | Primary sch.     | High-school      | 1.200   | .596 | .260  | -.43  | 2.83 |
|                        |                  | Junior college   | 1.667*  | .606 | .048  | .01   | 3.32 |
|                        |                  | Undergraduate    | 1.333   | .594 | .164  | -.29  | 2.96 |
|                        |                  | Master/doctorate | 1.541   | .600 | .077  | -.10  | 3.18 |
|                        | High-school      | Primary sch.     | -1.200  | .596 | .260  | -2.83 | .43  |
|                        |                  | Junior college   | .467*   | .145 | .012  | .07   | .86  |
|                        |                  | Undergraduate    | .133    | .079 | .444  | -.08  | .35  |
|                        |                  | Master/doctorate | .341*   | .118 | .032  | .02   | .66  |
|                        | Junior college   | Primary sch.     | -1.667* | .606 | .048  | -3.32 | -.01 |
|                        |                  | High-school      | -.467*  | .145 | .012  | -.86  | -.07 |
|                        |                  | Undergraduate    | -.333   | .136 | .104  | -.71  | .04  |
|                        |                  | Master/doctorate | -.126   | .162 | .936  | -.57  | .32  |
|                        | Undergraduate    | Primary sch.     | -1.333  | .594 | .164  | -2.96 | .29  |
|                        |                  | High-school      | -.133   | .079 | .444  | -.35  | .08  |
|                        |                  | Junior college   | .333    | .136 | .104  | -.04  | .71  |
|                        |                  | Master/doctorate | .207    | .107 | .295  | -.08  | .50  |
|                        | Master/doctorate | Primary sch.     | -1.541  | .600 | .077  | -3.18 | .10  |
|                        |                  | High-school      | -.341*  | .118 | .032  | -.66  | -.02 |
|                        |                  | Junior college   | .126    | .162 | .936  | -.32  | .57  |
|                        |                  | Undergraduate    | -.207   | .107 | .295  | -.50  | .08  |
| Kindergarten or school | Primary sch.     | High-school      | .300    | .428 | .956  | -.87  | 1.47 |
|                        |                  | Junior college   | .048    | .435 | 1.000 | -1.14 | 1.24 |
|                        |                  | Undergraduate    | .328    | .427 | .939  | -.84  | 1.49 |
|                        |                  | Master/doctorate | .243    | .431 | .980  | -.94  | 1.42 |

|                         |                  |                  |        |      |       |       |      |
|-------------------------|------------------|------------------|--------|------|-------|-------|------|
|                         | High-school      | Primary sch.     | -.300  | .428 | .956  | -1.47 | .87  |
|                         |                  | Junior college   | -.252  | .104 | .111  | -.54  | .03  |
|                         |                  | Undergraduate    | .028   | .057 | .988  | -.13  | .18  |
|                         |                  | Master/doctorate | -.057  | .085 | .963  | -.29  | .17  |
|                         | Junior college   | Primary sch.     | -.048  | .435 | 1.000 | -1.24 | 1.14 |
|                         |                  | High-school      | .252   | .104 | .111  | -.03  | .54  |
|                         |                  | Undergraduate    | .280*  | .098 | .035  | .01   | .55  |
|                         |                  | Master/doctorate | .196   | .116 | .445  | -.12  | .51  |
|                         | Undergraduate    | Primary sch.     | -.328  | .427 | .939  | -1.49 | .84  |
|                         |                  | High-school      | -.028  | .057 | .988  | -.18  | .13  |
|                         |                  | Junior college   | -.280* | .098 | .035  | -.55  | -.01 |
|                         |                  | Master/doctorate | -.085  | .077 | .803  | -.29  | .12  |
|                         | Master/doctorate | Primary sch.     | -.243  | .431 | .980  | -1.42 | .94  |
|                         |                  | High-school      | .057   | .085 | .963  | -.17  | .29  |
|                         |                  | Junior college   | -.196  | .116 | .445  | -.51  | .12  |
|                         |                  | Undergraduate    | .085   | .077 | .803  | -.12  | .29  |
| A place of greater risk | Primary sch.     | High-school      | 2.100  | .863 | .107  | -.26  | 4.46 |
|                         |                  | Junior college   | 2.381  | .878 | .053  | -.02  | 4.78 |
|                         |                  | Undergraduate    | 2.161  | .860 | .089  | -.19  | 4.51 |
|                         |                  | Master/doctorate | 1.649  | .869 | .320  | -.73  | 4.02 |
|                         | High-school      | Primary sch.     | -2.100 | .863 | .107  | -4.46 | .26  |
|                         |                  | Junior college   | .281   | .210 | .669  | -.29  | .86  |
|                         |                  | Undergraduate    | .061   | .115 | .984  | -.25  | .37  |
|                         |                  | Master/doctorate | -.451  | .171 | .063  | -.92  | .01  |
|                         | Junior college   | Primary sch.     | -2.381 | .878 | .053  | -4.78 | .02  |
|                         |                  | High-school      | -.281  | .210 | .669  | -.86  | .29  |
|                         |                  | Undergraduate    | -.220  | .197 | .800  | -.76  | .32  |
|                         |                  | Master/doctorate | -.732* | .234 | .016  | -1.37 | -.09 |
|                         | Undergraduate    | Primary sch.     | -2.161 | .860 | .089  | -4.51 | .19  |
|                         |                  | High-school      | -.061  | .115 | .984  | -.37  | .25  |
|                         |                  | Junior college   | .220   | .197 | .800  | -.32  | .76  |
|                         |                  | Master/doctorate | -.513* | .154 | .008  | -.93  | -.09 |
|                         | Master/doctorate | Primary sch.     | -1.649 | .869 | .320  | -4.02 | .73  |
|                         |                  | High-school      | .451   | .171 | .063  | -.01  | .92  |
|                         |                  | Junior college   | .732*  | .234 | .016  | .09   | 1.37 |
|                         |                  | Undergraduate    | .513*  | .154 | .008  | .09   | .93  |
| Losing my job           | Primary sch.     | High-school      | 2.325  | .862 | .055  | -.03  | 4.68 |
|                         |                  | Junior college   | 2.619* | .877 | .024  | .22   | 5.02 |
|                         |                  | Undergraduate    | 2.258  | .859 | .066  | -.09  | 4.61 |
|                         |                  | Master/doctorate | 2.189  | .868 | .087  | -.18  | 4.56 |
|                         | High-school      | Primary sch.     | -2.325 | .862 | .055  | -4.68 | .03  |
|                         |                  | Junior college   | .294   | .210 | .628  | -.28  | .87  |

|                    |                  |                  |         |      |       |       |      |
|--------------------|------------------|------------------|---------|------|-------|-------|------|
|                    |                  | Undergraduate    | -.067   | .115 | .977  | -.38  | .25  |
|                    |                  | Master/doctorate | -.136   | .170 | .931  | -.60  | .33  |
|                    | Junior college   | Primary sch.     | -2.619* | .877 | .024  | -5.02 | -.22 |
|                    |                  | High-school      | -.294   | .210 | .628  | -.87  | .28  |
|                    |                  | Undergraduate    | -.361   | .197 | .356  | -.90  | .18  |
|                    |                  | Master/doctorate | -.430   | .234 | .353  | -1.07 | .21  |
|                    | Undergraduate    | Primary sch.     | -2.258  | .859 | .066  | -4.61 | .09  |
|                    |                  | High-school      | .067    | .115 | .977  | -.25  | .38  |
|                    |                  | Junior college   | .361    | .197 | .356  | -.18  | .90  |
|                    |                  | Master/doctorate | -.069   | .154 | .992  | -.49  | .35  |
|                    | Master/doctorate | Primary sch.     | -2.189  | .868 | .087  | -4.56 | .18  |
|                    |                  | High-school      | .136    | .170 | .931  | -.33  | .60  |
|                    |                  | Junior college   | .430    | .234 | .353  | -.21  | 1.07 |
|                    |                  | Undergraduate    | .069    | .154 | .992  | -.35  | .49  |
| Prevent behavior   | Primary sch.     | High-school      | .625    | .445 | .625  | -.59  | 1.84 |
|                    |                  | Junior college   | .238    | .453 | .985  | -1.00 | 1.48 |
|                    |                  | Undergraduate    | .478    | .444 | .818  | -.73  | 1.69 |
|                    |                  | Master/doctorate | .405    | .448 | .895  | -.82  | 1.63 |
|                    | High-school      | Primary sch.     | -.625   | .445 | .625  | -1.84 | .59  |
|                    |                  | Junior college   | -.387*  | .108 | .003  | -.68  | -.09 |
|                    |                  | Undergraduate    | -.147   | .059 | .097  | -.31  | .02  |
|                    |                  | Master/doctorate | -.220   | .088 | .092  | -.46  | .02  |
|                    | Junior college   | Primary sch.     | -.238   | .453 | .985  | -1.48 | 1.00 |
|                    |                  | High-school      | .387*   | .108 | .003  | .09   | .68  |
|                    |                  | Undergraduate    | .240    | .102 | .127  | -.04  | .52  |
|                    |                  | Master/doctorate | .167    | .121 | .638  | -.16  | .50  |
|                    | Undergraduate    | Primary sch.     | -.478   | .444 | .818  | -1.69 | .73  |
|                    |                  | High-school      | .147    | .059 | .097  | -.02  | .31  |
|                    |                  | Junior college   | -.240   | .102 | .127  | -.52  | .04  |
|                    |                  | Master/doctorate | -.073   | .080 | .890  | -.29  | .14  |
|                    | Master/doctorate | Primary sch.     | -.405   | .448 | .895  | -1.63 | .82  |
|                    |                  | High-school      | .220    | .088 | .092  | -.02  | .46  |
|                    |                  | Junior college   | -.167   | .121 | .638  | -.50  | .16  |
|                    |                  | Undergraduate    | .073    | .080 | .890  | -.14  | .29  |
| The responsibility | Primary sch.     | High-school      | .463    | .438 | .829  | -.73  | 1.66 |
|                    |                  | Junior college   | .190    | .445 | .993  | -1.03 | 1.41 |
|                    |                  | Undergraduate    | .462    | .436 | .827  | -.73  | 1.65 |
|                    |                  | Master/doctorate | .216    | .441 | .988  | -.99  | 1.42 |
|                    | High-school      | Primary sch.     | -.463   | .438 | .829  | -1.66 | .73  |
|                    |                  | Junior college   | -.272   | .107 | .081  | -.56  | .02  |
|                    |                  | Undergraduate    | .000    | .058 | 1.000 | -.16  | .16  |
|                    |                  | Master/doctorate | -.246*  | .087 | .036  | -.48  | -.01 |

|                        |                  |                  |         |      |       |       |       |
|------------------------|------------------|------------------|---------|------|-------|-------|-------|
|                        | Junior college   | Primary sch.     | -.190   | .445 | .993  | -1.41 | 1.03  |
|                        |                  | High-school      | .272    | .107 | .081  | -.02  | .56   |
|                        |                  | Undergraduate    | .272    | .100 | .053  | .00   | .55   |
|                        |                  | Master/doctorate | .026    | .119 | 1.000 | -.30  | .35   |
|                        | Undergraduate    | Primary sch.     | -.462   | .436 | .827  | -1.65 | .73   |
|                        |                  | High-school      | .000    | .058 | 1.000 | -.16  | .16   |
|                        |                  | Junior college   | -.272   | .100 | .053  | -.55  | .00   |
|                        |                  | Master/doctorate | -.246*  | .078 | .015  | -.46  | -.03  |
|                        | Master/doctorate | Primary sch.     | -.216   | .441 | .988  | -1.42 | .99   |
|                        |                  | High-school      | .246*   | .087 | .036  | .01   | .48   |
|                        |                  | Junior college   | -.026   | .119 | 1.000 | -.35  | .30   |
|                        |                  | Undergraduate    | .246*   | .078 | .015  | .03   | .46   |
| Respecting measures    | Primary sch.     | High-school      | 2.425*  | .762 | .013  | .34   | 4.51  |
|                        |                  | Junior college   | 2.762*  | .775 | .003  | .64   | 4.88  |
|                        |                  | Undergraduate    | 2.737*  | .759 | .003  | .66   | 4.81  |
|                        |                  | Master/doctorate | 3.135*  | .767 | .000  | 1.04  | 5.23  |
|                        | High-school      | Primary sch.     | -2.425* | .762 | .013  | -4.51 | -.34  |
|                        |                  | Junior college   | .337    | .186 | .365  | -.17  | .84   |
|                        |                  | Undergraduate    | .312*   | .101 | .018  | .03   | .59   |
|                        |                  | Master/doctorate | .710*   | .150 | .000  | .30   | 1.12  |
|                        | Junior college   | Primary sch.     | -2.762* | .775 | .003  | -4.88 | -.64  |
|                        |                  | High-school      | -.337   | .186 | .365  | -.84  | .17   |
|                        |                  | Undergraduate    | -.025   | .174 | 1.000 | -.50  | .45   |
|                        |                  | Master/doctorate | .373    | .207 | .371  | -.19  | .94   |
|                        | Undergraduate    | Primary sch.     | -2.737* | .759 | .003  | -4.81 | -.66  |
|                        |                  | High-school      | -.312*  | .101 | .018  | -.59  | -.03  |
|                        |                  | Junior college   | .025    | .174 | 1.000 | -.45  | .50   |
|                        |                  | Master/doctorate | .399*   | .136 | .029  | .03   | .77   |
|                        | Master/doctorate | Primary sch.     | -3.135* | .767 | .000  | -5.23 | -1.04 |
|                        |                  | High-school      | -.710*  | .150 | .000  | -1.12 | -.30  |
|                        |                  | Junior college   | -.373   | .207 | .371  | -.94  | .19   |
|                        |                  | Undergraduate    | -.399*  | .136 | .029  | -.77  | -.03  |
| Information critically | Primary sch.     | High-school      | 1.375   | .601 | .150  | -.27  | 3.02  |
|                        |                  | Junior college   | 1.381   | .611 | .159  | -.29  | 3.05  |
|                        |                  | Undergraduate    | 1.457   | .599 | .108  | -.18  | 3.09  |
|                        |                  | Master/doctorate | 1.216   | .605 | .262  | -.44  | 2.87  |
|                        | High-school      | Primary sch.     | -1.375  | .601 | .150  | -3.02 | .27   |
|                        |                  | Junior college   | .006    | .146 | 1.000 | -.39  | .41   |
|                        |                  | Undergraduate    | .082    | .080 | .843  | -.14  | .30   |
|                        |                  | Master/doctorate | -.159   | .119 | .668  | -.48  | .17   |
|                        | Junior college   | Primary sch.     | -1.381  | .611 | .159  | -3.05 | .29   |
|                        |                  | High-school      | -.006   | .146 | 1.000 | -.41  | .39   |

|                       |                  |                  |        |      |       |       |      |
|-----------------------|------------------|------------------|--------|------|-------|-------|------|
|                       |                  | Undergraduate    | .076   | .138 | .982  | -.30  | .45  |
|                       |                  | Master/doctorate | -.165  | .163 | .851  | -.61  | .28  |
|                       | Undergraduate    | Primary sch.     | -1.457 | .599 | .108  | -3.09 | .18  |
|                       |                  | High-school      | -.082  | .080 | .843  | -.30  | .14  |
|                       |                  | Junior college   | -.076  | .138 | .982  | -.45  | .30  |
|                       |                  | Master/doctorate | -.241  | .108 | .166  | -.53  | .05  |
|                       | Master/doctorate | Primary sch.     | -1.216 | .605 | .262  | -2.87 | .44  |
|                       |                  | High-school      | .159   | .119 | .668  | -.17  | .48  |
|                       |                  | Junior college   | .165   | .163 | .851  | -.28  | .61  |
|                       |                  | Undergraduate    | .241   | .108 | .166  | -.05  | .53  |
| I'm afraid of health  | Primary sch.     | High-school      | 1.000  | .596 | .448  | -.63  | 2.63 |
|                       |                  | Junior college   | 1.000  | .606 | .466  | -.66  | 2.66 |
|                       |                  | Undergraduate    | .823   | .594 | .637  | -.80  | 2.45 |
|                       |                  | Master/doctorate | .973   | .600 | .484  | -.67  | 2.61 |
|                       | High-school      | Primary sch.     | -1.000 | .596 | .448  | -2.63 | .63  |
|                       |                  | Junior college   | .000   | .145 | 1.000 | -.40  | .40  |
|                       |                  | Undergraduate    | -.177  | .079 | .166  | -.39  | .04  |
|                       |                  | Master/doctorate | -.027  | .118 | .999  | -.35  | .29  |
|                       | Junior college   | Primary sch.     | -1.000 | .606 | .466  | -2.66 | .66  |
|                       |                  | High-school      | .000   | .145 | 1.000 | -.40  | .40  |
|                       |                  | Undergraduate    | -.177  | .136 | .690  | -.55  | .20  |
|                       |                  | Master/doctorate | -.027  | .162 | 1.000 | -.47  | .42  |
|                       | Undergraduate    | Primary sch.     | -.823  | .594 | .637  | -2.45 | .80  |
|                       |                  | High-school      | .177   | .079 | .166  | -.04  | .39  |
|                       |                  | Junior college   | .177   | .136 | .690  | -.20  | .55  |
|                       |                  | Master/doctorate | .150   | .107 | .621  | -.14  | .44  |
|                       | Master/doctorate | Primary sch.     | -.973  | .600 | .484  | -2.61 | .67  |
|                       |                  | High-school      | .027   | .118 | .999  | -.29  | .35  |
|                       |                  | Junior college   | .027   | .162 | 1.000 | -.42  | .47  |
|                       |                  | Undergraduate    | -.150  | .107 | .621  | -.44  | .14  |
| Econ.<br>consequences | Primary sch.     | High-school      | .688   | .546 | .716  | -.80  | 2.18 |
|                       |                  | Junior college   | .952   | .555 | .425  | -.56  | 2.47 |
|                       |                  | Undergraduate    | .731   | .544 | .663  | -.76  | 2.22 |
|                       |                  | Master/doctorate | .622   | .550 | .790  | -.88  | 2.12 |
|                       | High-school      | Primary sch.     | -.688  | .546 | .716  | -2.18 | .80  |
|                       |                  | Junior college   | .265   | .133 | .271  | -.10  | .63  |
|                       |                  | Undergraduate    | .044   | .073 | .975  | -.15  | .24  |
|                       |                  | Master/doctorate | -.066  | .108 | .973  | -.36  | .23  |
|                       | Junior college   | Primary sch.     | -.952  | .555 | .425  | -2.47 | .56  |
|                       |                  | High-school      | -.265  | .133 | .271  | -.63  | .10  |
|                       |                  | Undergraduate    | -.221  | .125 | .391  | -.56  | .12  |
|                       |                  | Master/doctorate | -.331  | .148 | .169  | -.74  | .07  |

|                                                          |                  |                  |         |      |       |       |      |
|----------------------------------------------------------|------------------|------------------|---------|------|-------|-------|------|
|                                                          | Undergraduate    | Primary sch.     | -.731   | .544 | .663  | -2.22 | .76  |
|                                                          |                  | High-school      | -.044   | .073 | .975  | -.24  | .15  |
|                                                          |                  | Junior college   | .221    | .125 | .391  | -.12  | .56  |
|                                                          |                  | Master/doctorate | -.110   | .098 | .795  | -.38  | .16  |
|                                                          | Master/doctorate | Primary sch.     | -.622   | .550 | .790  | -2.12 | .88  |
|                                                          |                  | High-school      | .066    | .108 | .973  | -.23  | .36  |
|                                                          |                  | Junior college   | .331    | .148 | .169  | -.07  | .74  |
|                                                          |                  | Undergraduate    | .110    | .098 | .795  | -.16  | .38  |
| Fear of restrictions                                     | Primary sch.     | High-school      | 2.425*  | .763 | .013  | .34   | 4.51 |
|                                                          |                  | Junior college   | 2.238*  | .776 | .033  | .12   | 4.36 |
|                                                          |                  | Undergraduate    | 2.425*  | .760 | .013  | .35   | 4.50 |
|                                                          |                  | Master/doctorate | 2.243*  | .768 | .029  | .14   | 4.34 |
|                                                          | High-school      | Primary sch.     | -2.425* | .763 | .013  | -4.51 | -.34 |
|                                                          |                  | Junior college   | -.187   | .186 | .853  | -.69  | .32  |
|                                                          |                  | Undergraduate    | .000    | .101 | 1.000 | -.28  | .28  |
|                                                          |                  | Master/doctorate | -.182   | .151 | .748  | -.59  | .23  |
|                                                          | Junior college   | Primary sch.     | -2.238* | .776 | .033  | -4.36 | -.12 |
|                                                          |                  | High-school      | .187    | .186 | .853  | -.32  | .69  |
|                                                          |                  | Undergraduate    | .187    | .175 | .822  | -.29  | .66  |
|                                                          |                  | Master/doctorate | .005    | .207 | 1.000 | -.56  | .57  |
|                                                          | Undergraduate    | Primary sch.     | -2.425* | .760 | .013  | -4.50 | -.35 |
|                                                          |                  | High-school      | .000    | .101 | 1.000 | -.28  | .28  |
|                                                          |                  | Junior college   | -.187   | .175 | .822  | -.66  | .29  |
|                                                          |                  | Master/doctorate | -.181   | .136 | .673  | -.55  | .19  |
|                                                          | Master/doctorate | Primary sch.     | -2.243* | .768 | .029  | -4.34 | -.14 |
|                                                          |                  | High-school      | .182    | .151 | .748  | -.23  | .59  |
|                                                          |                  | Junior college   | -.005   | .207 | 1.000 | -.57  | .56  |
|                                                          |                  | Undergraduate    | .181    | .136 | .673  | -.19  | .55  |
| *. The mean difference is significant at the 0.05 level. |                  |                  |         |      |       |       |      |

**Table 7.** One-way ANOVA results of different groups of independent variable and variables on the preventive measures for coronavirus diseases.

| ANOVA                     |                |                |     |             |      |      |
|---------------------------|----------------|----------------|-----|-------------|------|------|
|                           |                | Sum of Squares | df  | Mean Square | F    | Sig. |
| I wash my hands with soap | Between Groups | .376           | 4   | .094        | .315 | .868 |
|                           | Within Groups  | 289.433        | 970 | .298        |      |      |

|                                        |                |          |     |        |       |      |
|----------------------------------------|----------------|----------|-----|--------|-------|------|
|                                        | Total          | 289.809  | 974 |        |       |      |
| I'm disinfecting my hands              | Between Groups | 7.428    | 4   | 1.857  | 2.416 | .047 |
|                                        | Within Groups  | 745.655  | 970 | .769   |       |      |
|                                        | Total          | 753.083  | 974 |        |       |      |
| I wear a protective mask               | Between Groups | 22.609   | 4   | 5.652  | 1.972 | .097 |
|                                        | Within Groups  | 2780.314 | 970 | 2.866  |       |      |
|                                        | Total          | 2802.923 | 974 |        |       |      |
| I wear protective gloves               | Between Groups | 19.262   | 4   | 4.815  | 1.724 | .142 |
|                                        | Within Groups  | 2709.778 | 970 | 2.794  |       |      |
|                                        | Total          | 2729.040 | 974 |        |       |      |
| I don't touch my face                  | Between Groups | 11.817   | 4   | 2.954  | 2.165 | .071 |
|                                        | Within Groups  | 1323.820 | 970 | 1.365  |       |      |
|                                        | Total          | 1335.637 | 974 |        |       |      |
| I don't shake hands with acquaintances | Between Groups | 12.748   | 4   | 3.187  | 4.446 | .001 |
|                                        | Within Groups  | 695.289  | 970 | .717   |       |      |
|                                        | Total          | 708.037  | 974 |        |       |      |
| I'm not hugging others                 | Between Groups | 32.735   | 4   | 8.184  | 6.076 | .000 |
|                                        | Within Groups  | 1306.428 | 970 | 1.347  |       |      |
|                                        | Total          | 1339.163 | 974 |        |       |      |
| I do not kiss others                   | Between Groups | 46.023   | 4   | 11.506 | 7.838 | .000 |
|                                        | Within Groups  | 1423.940 | 970 | 1.468  |       |      |
|                                        | Total          | 1469.963 | 974 |        |       |      |
| Maintaining recommended distance       | Between Groups | 39.065   | 4   | 9.766  | 7.922 | .000 |
|                                        | Within Groups  | 1195.772 | 970 | 1.233  |       |      |
|                                        | Total          | 1234.837 | 974 |        |       |      |

|                                           |                |          |     |        |       |      |
|-------------------------------------------|----------------|----------|-----|--------|-------|------|
| I respect movement restrictions           | Between Groups | 1.662    | 4   | .416   | 2.083 | .081 |
|                                           | Within Groups  | 193.568  | 970 | .200   |       |      |
|                                           | Total          | 195.231  | 974 |        |       |      |
| I avoid contacts with the elderly         | Between Groups | 5.806    | 4   | 1.451  | 2.061 | .084 |
|                                           | Within Groups  | 683.271  | 970 | .704   |       |      |
|                                           | Total          | 689.077  | 974 |        |       |      |
| I don't meet with family members          | Between Groups | 8.296    | 4   | 2.074  | 1.414 | .227 |
|                                           | Within Groups  | 1423.156 | 970 | 1.467  |       |      |
|                                           | Total          | 1431.452 | 974 |        |       |      |
| I use disinfectants for clothes and shoes | Between Groups | 17.535   | 4   | 4.384  | 2.210 | .066 |
|                                           | Within Groups  | 1923.733 | 970 | 1.983  |       |      |
|                                           | Total          | 1941.268 | 974 |        |       |      |
| Disinfection of pets paws                 | Between Groups | 51.544   | 4   | 12.886 | 4.081 | .003 |
|                                           | Within Groups  | 3062.604 | 970 | 3.157  |       |      |
|                                           | Total          | 3114.148 | 974 |        |       |      |
| I have no contacts with pets              | Between Groups | 64.611   | 4   | 16.153 | 5.072 | .000 |
|                                           | Within Groups  | 3089.081 | 970 | 3.185  |       |      |
|                                           | Total          | 3153.692 | 974 |        |       |      |
| Plan isolation household members          | Between Groups | 43.888   | 4   | 10.972 | 4.703 | .001 |
|                                           | Within Groups  | 2262.844 | 970 | 2.333  |       |      |
|                                           | Total          | 2306.732 | 974 |        |       |      |
| Household nutrition plan                  | Between Groups | 15.392   | 4   | 3.848  | 1.804 | .126 |
|                                           | Within Groups  | 2069.248 | 970 | 2.133  |       |      |
|                                           | Total          | 2084.640 | 974 |        |       |      |
| I have groceries                          | Between Groups | 49.635   | 4   | 12.409 | 8.884 | .000 |

|                        |                |          |     |        |        |      |
|------------------------|----------------|----------|-----|--------|--------|------|
|                        | Within Groups  | 1354.882 | 970 | 1.397  |        |      |
|                        | Total          | 1404.517 | 974 |        |        |      |
| I have enough supplies | Between Groups | 93.721   | 4   | 23.430 | 11.000 | .000 |
|                        | Within Groups  | 2066.132 | 970 | 2.130  |        |      |
|                        | Total          | 2159.852 | 974 |        |        |      |

| Multiple Comparisons      |                  |                  |                       |            |       |                         |             |
|---------------------------|------------------|------------------|-----------------------|------------|-------|-------------------------|-------------|
| Tukey HSD                 |                  |                  |                       |            |       |                         |             |
| Dependent Variable        | (I) Education    | (J) Education    | Mean Difference (I-J) | Std. Error | Sig.  | 95% Confidence Interval |             |
|                           |                  |                  |                       |            |       | Lower Bound             | Upper Bound |
| I wash my hands with soap | Primary sch.     | Srednja          | .250                  | .317       | .934  | -.62                    | 1.12        |
|                           |                  | High-school      | .238                  | .323       | .948  | -.64                    | 1.12        |
|                           |                  | Undergraduate    | .215                  | .316       | .961  | -.65                    | 1.08        |
|                           |                  | Master/doctorate | .216                  | .320       | .961  | -.66                    | 1.09        |
|                           | Srednja          | Primary sch.     | -.250                 | .317       | .934  | -1.12                   | .62         |
|                           |                  | High-school      | -.012                 | .077       | 1.000 | -.22                    | .20         |
|                           |                  | Undergraduate    | -.035                 | .042       | .922  | -.15                    | .08         |
|                           |                  | Master/doctorate | -.034                 | .063       | .983  | -.21                    | .14         |
|                           | High-school      | Primary sch.     | -.238                 | .323       | .948  | -1.12                   | .64         |
|                           |                  | Srednja          | .012                  | .077       | 1.000 | -.20                    | .22         |
|                           |                  | Undergraduate    | -.023                 | .073       | .998  | -.22                    | .18         |
|                           |                  | Master/doctorate | -.022                 | .086       | .999  | -.26                    | .21         |
|                           | Undergraduate    | Primary sch.     | -.215                 | .316       | .961  | -1.08                   | .65         |
|                           |                  | Srednja          | .035                  | .042       | .922  | -.08                    | .15         |
|                           |                  | High-school      | .023                  | .073       | .998  | -.18                    | .22         |
|                           |                  | Master/doctorate | .001                  | .057       | 1.000 | -.15                    | .16         |
|                           | Master/doctorate | Primary sch.     | -.216                 | .320       | .961  | -1.09                   | .66         |
|                           |                  | Srednja          | .034                  | .063       | .983  | -.14                    | .21         |
|                           |                  | High-school      | .022                  | .086       | .999  | -.21                    | .26         |
|                           |                  | Undergraduate    | -.001                 | .057       | 1.000 | -.16                    | .15         |
| I'm disinfecting my hands | Primary sch.     | Srednja          | .638                  | .509       | .721  | -.75                    | 2.03        |
|                           |                  | High-school      | .667                  | .518       | .700  | -.75                    | 2.08        |
|                           |                  | Undergraduate    | .489                  | .508       | .871  | -.90                    | 1.88        |
|                           |                  | Master/doctorate | .405                  | .513       | .933  | -1.00                   | 1.81        |

|                          |                  |                  |        |       |       |       |      |
|--------------------------|------------------|------------------|--------|-------|-------|-------|------|
|                          | Srednja          | Primary sch.     | -.638  | .509  | .721  | -2.03 | .75  |
|                          |                  | High-school      | .029   | .124  | .999  | -.31  | .37  |
|                          |                  | Undergraduate    | -.148  | .068  | .184  | -.33  | .04  |
|                          |                  | Master/doctorate | -.232  | .101  | .144  | -.51  | .04  |
|                          | High-school      | Primary sch.     | -.667  | .518  | .700  | -2.08 | .75  |
|                          |                  | Srednja          | -.029  | .124  | .999  | -.37  | .31  |
|                          |                  | Undergraduate    | -.177  | .117  | .548  | -.50  | .14  |
|                          |                  | Master/doctorate | -.261  | .138  | .324  | -.64  | .12  |
|                          | Undergraduate    | Primary sch.     | -.489  | .508  | .871  | -1.88 | .90  |
|                          |                  | Srednja          | .148   | .068  | .184  | -.04  | .33  |
|                          |                  | High-school      | .177   | .117  | .548  | -.14  | .50  |
|                          |                  | Master/doctorate | -.084  | .091  | .889  | -.33  | .17  |
|                          | Master/doctorate | Primary sch.     | -.405  | .513  | .933  | -1.81 | 1.00 |
|                          |                  | Srednja          | .232   | .101  | .144  | -.04  | .51  |
|                          |                  | High-school      | .261   | .138  | .324  | -.12  | .64  |
|                          |                  | Undergraduate    | .084   | .091  | .889  | -.17  | .33  |
| I wear a protective mask | Primary sch.     | Srednja          | 1.850  | .984  | .328  | -.84  | 4.54 |
|                          |                  | High-school      | 1.810  | 1.000 | .369  | -.92  | 4.54 |
|                          |                  | Undergraduate    | 1.667  | .980  | .434  | -1.01 | 4.35 |
|                          |                  | Master/doctorate | 2.000  | .991  | .258  | -.71  | 4.71 |
|                          | Srednja          | Primary sch.     | -1.850 | .984  | .328  | -4.54 | .84  |
|                          |                  | High-school      | -.040  | .240  | 1.000 | -.70  | .61  |
|                          |                  | Undergraduate    | -.183  | .131  | .626  | -.54  | .17  |
|                          |                  | Master/doctorate | .150   | .194  | .939  | -.38  | .68  |
|                          | High-school      | Primary sch.     | -1.810 | 1.000 | .369  | -4.54 | .92  |
|                          |                  | Srednja          | .040   | .240  | 1.000 | -.61  | .70  |
|                          |                  | Undergraduate    | -.143  | .225  | .969  | -.76  | .47  |
|                          |                  | Master/doctorate | .190   | .267  | .953  | -.54  | .92  |
|                          | Undergraduate    | Primary sch.     | -1.667 | .980  | .434  | -4.35 | 1.01 |
|                          |                  | Srednja          | .183   | .131  | .626  | -.17  | .54  |
|                          |                  | High-school      | .143   | .225  | .969  | -.47  | .76  |
|                          |                  | Master/doctorate | .333   | .176  | .321  | -.15  | .81  |
|                          | Master/doctorate | Primary sch.     | -2.000 | .991  | .258  | -4.71 | .71  |
|                          |                  | Srednja          | -.150  | .194  | .939  | -.68  | .38  |
|                          |                  | High-school      | -.190  | .267  | .953  | -.92  | .54  |
|                          |                  | Undergraduate    | -.333  | .176  | .321  | -.81  | .15  |
| I wear protective gloves | Primary sch.     | Srednja          | 1.763  | .971  | .365  | -.89  | 4.42 |
|                          |                  | High-school      | 2.143  | .988  | .192  | -.56  | 4.84 |
|                          |                  | Undergraduate    | 1.871  | .968  | .300  | -.77  | 4.52 |
|                          |                  | Master/doctorate | 1.730  | .978  | .393  | -.94  | 4.40 |
|                          | Srednja          | Primary sch.     | -1.763 | .971  | .365  | -4.42 | .89  |
|                          |                  | High-school      | .380   | .237  | .493  | -.27  | 1.03 |

|                                        |                  |                  |        |      |       |       |      |
|----------------------------------------|------------------|------------------|--------|------|-------|-------|------|
|                                        |                  | Undergraduate    | .108   | .129 | .918  | -.24  | .46  |
|                                        |                  | Master/doctorate | -.033  | .192 | 1.000 | -.56  | .49  |
|                                        | High-school      | Primary sch.     | -2.143 | .988 | .192  | -4.84 | .56  |
|                                        |                  | Srednja          | -.380  | .237 | .493  | -1.03 | .27  |
|                                        |                  | Undergraduate    | -.272  | .222 | .737  | -.88  | .34  |
|                                        |                  | Master/doctorate | -.413  | .264 | .519  | -1.13 | .31  |
|                                        | Undergraduate    | Primary sch.     | -1.871 | .968 | .300  | -4.52 | .77  |
|                                        |                  | Srednja          | -.108  | .129 | .918  | -.46  | .24  |
|                                        |                  | High-school      | .272   | .222 | .737  | -.34  | .88  |
|                                        |                  | Master/doctorate | -.141  | .174 | .927  | -.62  | .33  |
|                                        | Master/doctorate | Primary sch.     | -1.730 | .978 | .393  | -4.40 | .94  |
|                                        |                  | Srednja          | .033   | .192 | 1.000 | -.49  | .56  |
|                                        |                  | High-school      | .413   | .264 | .519  | -.31  | 1.13 |
|                                        |                  | Undergraduate    | .141   | .174 | .927  | -.33  | .62  |
| I don't touch my face                  | Primary sch.     | Srednja          | .938   | .679 | .640  | -.92  | 2.79 |
|                                        |                  | High-school      | 1.333  | .690 | .301  | -.55  | 3.22 |
|                                        |                  | Undergraduate    | 1.075  | .676 | .504  | -.77  | 2.92 |
|                                        |                  | Master/doctorate | 1.027  | .684 | .561  | -.84  | 2.90 |
|                                        | Srednja          | Primary sch.     | -.938  | .679 | .640  | -2.79 | .92  |
|                                        |                  | High-school      | .396   | .165 | .118  | -.06  | .85  |
|                                        |                  | Undergraduate    | .138   | .090 | .545  | -.11  | .38  |
|                                        |                  | Master/doctorate | .090   | .134 | .963  | -.28  | .46  |
|                                        | High-school      | Primary sch.     | -1.333 | .690 | .301  | -3.22 | .55  |
|                                        |                  | Srednja          | -.396  | .165 | .118  | -.85  | .06  |
|                                        |                  | Undergraduate    | -.258  | .155 | .458  | -.68  | .17  |
|                                        |                  | Master/doctorate | -.306  | .184 | .458  | -.81  | .20  |
|                                        | Undergraduate    | Primary sch.     | -1.075 | .676 | .504  | -2.92 | .77  |
|                                        |                  | Srednja          | -.138  | .090 | .545  | -.38  | .11  |
|                                        |                  | High-school      | .258   | .155 | .458  | -.17  | .68  |
|                                        |                  | Master/doctorate | -.048  | .121 | .995  | -.38  | .28  |
|                                        | Master/doctorate | Primary sch.     | -1.027 | .684 | .561  | -2.90 | .84  |
|                                        |                  | Srednja          | -.090  | .134 | .963  | -.46  | .28  |
|                                        |                  | High-school      | .306   | .184 | .458  | -.20  | .81  |
|                                        |                  | Undergraduate    | .048   | .121 | .995  | -.28  | .38  |
| I don't shake hands with acquaintances | Primary sch.     | Srednja          | .438   | .492 | .901  | -.91  | 1.78 |
|                                        |                  | High-school      | .286   | .500 | .979  | -1.08 | 1.65 |
|                                        |                  | Undergraduate    | .382   | .490 | .937  | -.96  | 1.72 |
|                                        |                  | Master/doctorate | .054   | .495 | 1.000 | -1.30 | 1.41 |
|                                        | Srednja          | Primary sch.     | -.438  | .492 | .901  | -1.78 | .91  |
|                                        |                  | High-school      | -.152  | .120 | .712  | -.48  | .18  |
|                                        |                  | Undergraduate    | -.056  | .065 | .914  | -.23  | .12  |
|                                        |                  | Master/doctorate | -.383* | .097 | .001  | -.65  | -.12 |

|                        |                  |                  |        |      |       |       |      |
|------------------------|------------------|------------------|--------|------|-------|-------|------|
|                        | High-school      | Primary sch.     | -.286  | .500 | .979  | -1.65 | 1.08 |
|                        |                  | Srednja          | .152   | .120 | .712  | -.18  | .48  |
|                        |                  | Undergraduate    | .096   | .113 | .914  | -.21  | .40  |
|                        |                  | Master/doctorate | -.232  | .134 | .413  | -.60  | .13  |
|                        | Undergraduate    | Primary sch.     | -.382  | .490 | .937  | -1.72 | .96  |
|                        |                  | Srednja          | .056   | .065 | .914  | -.12  | .23  |
|                        |                  | High-school      | -.096  | .113 | .914  | -.40  | .21  |
|                        |                  | Master/doctorate | -.328* | .088 | .002  | -.57  | -.09 |
|                        | Master/doctorate | Primary sch.     | -.054  | .495 | 1.000 | -1.41 | 1.30 |
|                        |                  | Srednja          | .383*  | .097 | .001  | .12   | .65  |
|                        |                  | High-school      | .232   | .134 | .413  | -.13  | .60  |
|                        |                  | Undergraduate    | .328*  | .088 | .002  | .09   | .57  |
| I'm not hugging others | Primary sch.     | Srednja          | .925   | .674 | .646  | -.92  | 2.77 |
|                        |                  | High-school      | .286   | .686 | .994  | -1.59 | 2.16 |
|                        |                  | Undergraduate    | .731   | .672 | .813  | -1.10 | 2.57 |
|                        |                  | Master/doctorate | .432   | .679 | .969  | -1.42 | 2.29 |
|                        | Srednja          | Primary sch.     | -.925  | .674 | .646  | -2.77 | .92  |
|                        |                  | High-school      | -.639* | .164 | .001  | -1.09 | -.19 |
|                        |                  | Undergraduate    | -.194  | .090 | .195  | -.44  | .05  |
|                        |                  | Master/doctorate | -.493* | .133 | .002  | -.86  | -.13 |
|                        | High-school      | Primary sch.     | -.286  | .686 | .994  | -2.16 | 1.59 |
|                        |                  | Srednja          | .639*  | .164 | .001  | .19   | 1.09 |
|                        |                  | Undergraduate    | .445*  | .154 | .032  | .02   | .87  |
|                        |                  | Master/doctorate | .147   | .183 | .930  | -.35  | .65  |
|                        | Undergraduate    | Primary sch.     | -.731  | .672 | .813  | -2.57 | 1.10 |
|                        |                  | Srednja          | .194   | .090 | .195  | -.05  | .44  |
|                        |                  | High-school      | -.445* | .154 | .032  | -.87  | -.02 |
|                        |                  | Master/doctorate | -.299  | .121 | .097  | -.63  | .03  |
|                        | Master/doctorate | Primary sch.     | -.432  | .679 | .969  | -2.29 | 1.42 |
|                        |                  | Srednja          | .493*  | .133 | .002  | .13   | .86  |
|                        |                  | High-school      | -.147  | .183 | .930  | -.65  | .35  |
|                        |                  | Undergraduate    | .299   | .121 | .097  | -.03  | .63  |
| I do not kiss others   | Primary sch.     | Srednja          | .862   | .704 | .737  | -1.06 | 2.79 |
|                        |                  | High-school      | .190   | .716 | .999  | -1.77 | 2.15 |
|                        |                  | Undergraduate    | .753   | .701 | .820  | -1.16 | 2.67 |
|                        |                  | Master/doctorate | .270   | .709 | .996  | -1.67 | 2.21 |
|                        | Srednja          | Primary sch.     | -.862  | .704 | .737  | -2.79 | 1.06 |
|                        |                  | High-school      | -.672* | .172 | .001  | -1.14 | -.20 |
|                        |                  | Undergraduate    | -.110  | .094 | .766  | -.37  | .15  |
|                        |                  | Master/doctorate | -.592* | .139 | .000  | -.97  | -.21 |
|                        | High-school      | Primary sch.     | -.190  | .716 | .999  | -2.15 | 1.77 |
|                        |                  | Srednja          | .672*  | .172 | .001  | .20   | 1.14 |

|                                  |                  |                  |        |      |       |       |      |
|----------------------------------|------------------|------------------|--------|------|-------|-------|------|
|                                  |                  | Undergraduate    | .562*  | .161 | .005  | .12   | 1.00 |
|                                  |                  | Master/doctorate | .080   | .191 | .994  | -.44  | .60  |
|                                  | Undergraduate    | Primary sch.     | -.753  | .701 | .820  | -2.67 | 1.16 |
|                                  |                  | Srednja          | .110   | .094 | .766  | -.15  | .37  |
|                                  |                  | High-school      | -.562* | .161 | .005  | -1.00 | -.12 |
|                                  |                  | Master/doctorate | -.482* | .126 | .001  | -.83  | -.14 |
|                                  | Master/doctorate | Primary sch.     | -.270  | .709 | .996  | -2.21 | 1.67 |
|                                  |                  | Srednja          | .592*  | .139 | .000  | .21   | .97  |
|                                  |                  | High-school      | -.080  | .191 | .994  | -.60  | .44  |
|                                  |                  | Undergraduate    | .482*  | .126 | .001  | .14   | .83  |
| Maintaining recommended distance | Primary sch.     | Srednja          | 1.013  | .645 | .517  | -.75  | 2.78 |
|                                  |                  | High-school      | .524   | .656 | .931  | -1.27 | 2.32 |
|                                  |                  | Undergraduate    | .909   | .643 | .619  | -.85  | 2.67 |
|                                  |                  | Master/doctorate | .405   | .650 | .971  | -1.37 | 2.18 |
|                                  | Srednja          | Primary sch.     | -1.013 | .645 | .517  | -2.78 | .75  |
|                                  |                  | High-school      | -.489* | .157 | .017  | -.92  | -.06 |
|                                  |                  | Undergraduate    | -.104  | .086 | .744  | -.34  | .13  |
|                                  |                  | Master/doctorate | -.607* | .127 | .000  | -.96  | -.26 |
|                                  | High-school      | Primary sch.     | -.524  | .656 | .931  | -2.32 | 1.27 |
|                                  |                  | Srednja          | .489*  | .157 | .017  | .06   | .92  |
|                                  |                  | Undergraduate    | .385   | .148 | .070  | -.02  | .79  |
|                                  |                  | Master/doctorate | -.118  | .175 | .962  | -.60  | .36  |
|                                  | Undergraduate    | Primary sch.     | -.909  | .643 | .619  | -2.67 | .85  |
|                                  |                  | Srednja          | .104   | .086 | .744  | -.13  | .34  |
|                                  |                  | High-school      | -.385  | .148 | .070  | -.79  | .02  |
|                                  |                  | Master/doctorate | -.503* | .115 | .000  | -.82  | -.19 |
|                                  | Master/doctorate | Primary sch.     | -.405  | .650 | .971  | -2.18 | 1.37 |
|                                  |                  | Srednja          | .607*  | .127 | .000  | .26   | .96  |
|                                  |                  | High-school      | .118   | .175 | .962  | -.36  | .60  |
|                                  |                  | Undergraduate    | .503*  | .115 | .000  | .19   | .82  |
| I respect movement restrictions  | Primary sch.     | Srednja          | .100   | .260 | .995  | -.61  | .81  |
|                                  |                  | High-school      | .048   | .264 | 1.000 | -.67  | .77  |
|                                  |                  | Undergraduate    | .156   | .259 | .975  | -.55  | .86  |
|                                  |                  | Master/doctorate | .054   | .261 | 1.000 | -.66  | .77  |
|                                  | Srednja          | Primary sch.     | -.100  | .260 | .995  | -.81  | .61  |
|                                  |                  | High-school      | -.052  | .063 | .922  | -.23  | .12  |
|                                  |                  | Undergraduate    | .056   | .034 | .484  | -.04  | .15  |
|                                  |                  | Master/doctorate | -.046  | .051 | .898  | -.19  | .09  |
|                                  | High-school      | Primary sch.     | -.048  | .264 | 1.000 | -.77  | .67  |
|                                  |                  | Srednja          | .052   | .063 | .922  | -.12  | .23  |
|                                  |                  | Undergraduate    | .108   | .059 | .360  | -.05  | .27  |
|                                  |                  | Master/doctorate | .006   | .070 | 1.000 | -.19  | .20  |

|                                   |                  |                  |       |      |       |       |      |
|-----------------------------------|------------------|------------------|-------|------|-------|-------|------|
|                                   | Undergraduate    | Primary sch.     | -.156 | .259 | .975  | -.86  | .55  |
|                                   |                  | Srednja          | -.056 | .034 | .484  | -.15  | .04  |
|                                   |                  | High-school      | -.108 | .059 | .360  | -.27  | .05  |
|                                   |                  | Master/doctorate | -.102 | .046 | .183  | -.23  | .03  |
|                                   | Master/doctorate | Primary sch.     | -.054 | .261 | 1.000 | -.77  | .66  |
|                                   |                  | Srednja          | .046  | .051 | .898  | -.09  | .19  |
|                                   |                  | High-school      | -.006 | .070 | 1.000 | -.20  | .19  |
|                                   |                  | Undergraduate    | .102  | .046 | .183  | -.03  | .23  |
| I avoid contacts with the elderly | Primary sch.     | Srednja          | .450  | .488 | .888  | -.88  | 1.78 |
|                                   |                  | High-school      | .143  | .496 | .998  | -1.21 | 1.50 |
|                                   |                  | Undergraduate    | .376  | .486 | .938  | -.95  | 1.70 |
|                                   |                  | Master/doctorate | .297  | .491 | .974  | -1.04 | 1.64 |
|                                   | Srednja          | Primary sch.     | -.450 | .488 | .888  | -1.78 | .88  |
|                                   |                  | High-school      | -.307 | .119 | .074  | -.63  | .02  |
|                                   |                  | Undergraduate    | -.074 | .065 | .787  | -.25  | .10  |
|                                   |                  | Master/doctorate | -.153 | .096 | .507  | -.42  | .11  |
|                                   | High-school      | Primary sch.     | -.143 | .496 | .998  | -1.50 | 1.21 |
|                                   |                  | Srednja          | .307  | .119 | .074  | -.02  | .63  |
|                                   |                  | Undergraduate    | .233  | .112 | .224  | -.07  | .54  |
|                                   |                  | Master/doctorate | .154  | .132 | .770  | -.21  | .52  |
|                                   | Undergraduate    | Primary sch.     | -.376 | .486 | .938  | -1.70 | .95  |
|                                   |                  | Srednja          | .074  | .065 | .787  | -.10  | .25  |
|                                   |                  | High-school      | -.233 | .112 | .224  | -.54  | .07  |
|                                   |                  | Master/doctorate | -.079 | .087 | .895  | -.32  | .16  |
|                                   | Master/doctorate | Primary sch.     | -.297 | .491 | .974  | -1.64 | 1.04 |
|                                   |                  | Srednja          | .153  | .096 | .507  | -.11  | .42  |
|                                   |                  | High-school      | -.154 | .132 | .770  | -.52  | .21  |
|                                   |                  | Undergraduate    | .079  | .087 | .895  | -.16  | .32  |
| I don't meet with family members  | Primary sch.     | Srednja          | .888  | .704 | .715  | -1.04 | 2.81 |
|                                   |                  | High-school      | .857  | .716 | .753  | -1.10 | 2.81 |
|                                   |                  | Undergraduate    | .747  | .701 | .824  | -1.17 | 2.66 |
|                                   |                  | Master/doctorate | .622  | .709 | .905  | -1.32 | 2.56 |
|                                   | Srednja          | Primary sch.     | -.888 | .704 | .715  | -2.81 | 1.04 |
|                                   |                  | High-school      | -.030 | .171 | 1.000 | -.50  | .44  |
|                                   |                  | Undergraduate    | -.140 | .094 | .563  | -.40  | .12  |
|                                   |                  | Master/doctorate | -.266 | .139 | .311  | -.65  | .11  |
|                                   | High-school      | Primary sch.     | -.857 | .716 | .753  | -2.81 | 1.10 |
|                                   |                  | Srednja          | .030  | .171 | 1.000 | -.44  | .50  |
|                                   |                  | Undergraduate    | -.110 | .161 | .960  | -.55  | .33  |
|                                   |                  | Master/doctorate | -.236 | .191 | .732  | -.76  | .29  |
|                                   | Undergraduate    | Primary sch.     | -.747 | .701 | .824  | -2.66 | 1.17 |
|                                   |                  | Srednja          | .140  | .094 | .563  | -.12  | .40  |

|                                           |                  |                  |        |       |       |       |      |
|-------------------------------------------|------------------|------------------|--------|-------|-------|-------|------|
|                                           |                  | High-school      | .110   | .161  | .960  | -.33  | .55  |
|                                           |                  | Master/doctorate | -.126  | .126  | .856  | -.47  | .22  |
|                                           | Master/doctorate | Primary sch.     | -.622  | .709  | .905  | -2.56 | 1.32 |
|                                           |                  | Srednja          | .266   | .139  | .311  | -.11  | .65  |
|                                           |                  | High-school      | .236   | .191  | .732  | -.29  | .76  |
|                                           |                  | Undergraduate    | .126   | .126  | .856  | -.22  | .47  |
| I use disinfectants for clothes and shoes | Primary sch.     | Srednja          | 1.538  | .818  | .329  | -.70  | 3.77 |
|                                           |                  | High-school      | 1.238  | .832  | .571  | -1.04 | 3.51 |
|                                           |                  | Undergraduate    | 1.296  | .815  | .505  | -.93  | 3.52 |
|                                           |                  | Master/doctorate | 1.243  | .824  | .557  | -1.01 | 3.50 |
|                                           | Srednja          | Primary sch.     | -1.538 | .818  | .329  | -3.77 | .70  |
|                                           |                  | High-school      | -.299  | .199  | .561  | -.84  | .25  |
|                                           |                  | Undergraduate    | -.242  | .109  | .172  | -.54  | .06  |
|                                           |                  | Master/doctorate | -.294  | .162  | .362  | -.74  | .15  |
|                                           | High-school      | Primary sch.     | -1.238 | .832  | .571  | -3.51 | 1.04 |
|                                           |                  | Srednja          | .299   | .199  | .561  | -.25  | .84  |
|                                           |                  | Undergraduate    | .058   | .187  | .998  | -.45  | .57  |
|                                           |                  | Master/doctorate | .005   | .222  | 1.000 | -.60  | .61  |
|                                           | Undergraduate    | Primary sch.     | -1.296 | .815  | .505  | -3.52 | .93  |
|                                           |                  | Srednja          | .242   | .109  | .172  | -.06  | .54  |
|                                           |                  | High-school      | -.058  | .187  | .998  | -.57  | .45  |
|                                           |                  | Master/doctorate | -.052  | .146  | .996  | -.45  | .35  |
|                                           | Master/doctorate | Primary sch.     | -1.243 | .824  | .557  | -3.50 | 1.01 |
|                                           |                  | Srednja          | .294   | .162  | .362  | -.15  | .74  |
|                                           |                  | High-school      | -.005  | .222  | 1.000 | -.61  | .60  |
|                                           |                  | Undergraduate    | .052   | .146  | .996  | -.35  | .45  |
| Disinfection of pets paws                 | Primary sch.     | Srednja          | 1.563  | 1.032 | .554  | -1.26 | 4.38 |
|                                           |                  | High-school      | 2.476  | 1.050 | .128  | -.39  | 5.35 |
|                                           |                  | Undergraduate    | 1.677  | 1.029 | .478  | -1.13 | 4.49 |
|                                           |                  | Master/doctorate | 1.730  | 1.040 | .457  | -1.11 | 4.57 |
|                                           | Srednja          | Primary sch.     | -1.563 | 1.032 | .554  | -4.38 | 1.26 |
|                                           |                  | High-school      | .914*  | .252  | .003  | .23   | 1.60 |
|                                           |                  | Undergraduate    | .115   | .137  | .919  | -.26  | .49  |
|                                           |                  | Master/doctorate | .167   | .204  | .925  | -.39  | .72  |
|                                           | High-school      | Primary sch.     | -2.476 | 1.050 | .128  | -5.35 | .39  |
|                                           |                  | Srednja          | -.914* | .252  | .003  | -1.60 | -.23 |
|                                           |                  | Undergraduate    | -.799* | .236  | .007  | -1.44 | -.15 |
|                                           |                  | Master/doctorate | -.746  | .280  | .060  | -1.51 | .02  |
|                                           | Undergraduate    | Primary sch.     | -1.677 | 1.029 | .478  | -4.49 | 1.13 |
|                                           |                  | Srednja          | -.115  | .137  | .919  | -.49  | .26  |
|                                           |                  | High-school      | .799*  | .236  | .007  | .15   | 1.44 |
|                                           |                  | Master/doctorate | .052   | .185  | .999  | -.45  | .56  |

|                                     |                  |                  |         |       |       |       |      |
|-------------------------------------|------------------|------------------|---------|-------|-------|-------|------|
|                                     | Master/doctorate | Primary sch.     | -1.730  | 1.040 | .457  | -4.57 | 1.11 |
|                                     |                  | Srednja          | -.167   | .204  | .925  | -.72  | .39  |
|                                     |                  | High-school      | .746    | .280  | .060  | -.02  | 1.51 |
|                                     |                  | Undergraduate    | -.052   | .185  | .999  | -.56  | .45  |
| I have no contacts with<br>pets     | Primary sch.     | Srednja          | 2.288   | 1.037 | .178  | -.55  | 5.12 |
|                                     |                  | High-school      | 3.143*  | 1.055 | .025  | .26   | 6.02 |
|                                     |                  | Undergraduate    | 2.231   | 1.033 | .196  | -.59  | 5.05 |
|                                     |                  | Master/doctorate | 2.189   | 1.044 | .222  | -.66  | 5.04 |
|                                     | Srednja          | Primary sch.     | -2.288  | 1.037 | .178  | -5.12 | .55  |
|                                     |                  | High-school      | .855*   | .253  | .007  | .16   | 1.55 |
|                                     |                  | Undergraduate    | -.056   | .138  | .994  | -.43  | .32  |
|                                     |                  | Master/doctorate | -.098   | .205  | .989  | -.66  | .46  |
|                                     | High-school      | Primary sch.     | -3.143* | 1.055 | .025  | -6.02 | -.26 |
|                                     |                  | Srednja          | -.855*  | .253  | .007  | -1.55 | -.16 |
|                                     |                  | Undergraduate    | -.912*  | .237  | .001  | -1.56 | -.26 |
|                                     |                  | Master/doctorate | -.954*  | .281  | .007  | -1.72 | -.18 |
|                                     | Undergraduate    | Primary sch.     | -2.231  | 1.033 | .196  | -5.05 | .59  |
|                                     |                  | Srednja          | .056    | .138  | .994  | -.32  | .43  |
|                                     |                  | High-school      | .912*   | .237  | .001  | .26   | 1.56 |
|                                     |                  | Master/doctorate | -.042   | .185  | .999  | -.55  | .46  |
|                                     | Master/doctorate | Primary sch.     | -2.189  | 1.044 | .222  | -5.04 | .66  |
|                                     |                  | Srednja          | .098    | .205  | .989  | -.46  | .66  |
|                                     |                  | High-school      | .954*   | .281  | .007  | .18   | 1.72 |
|                                     |                  | Undergraduate    | .042    | .185  | .999  | -.46  | .55  |
| Plan isolation<br>household members | Primary sch.     | Srednja          | 1.925   | .887  | .192  | -.50  | 4.35 |
|                                     |                  | High-school      | 2.190   | .903  | .109  | -.28  | 4.66 |
|                                     |                  | Undergraduate    | 2.296   | .884  | .072  | -.12  | 4.71 |
|                                     |                  | Master/doctorate | 1.919   | .894  | .201  | -.52  | 4.36 |
|                                     | Srednja          | Primary sch.     | -1.925  | .887  | .192  | -4.35 | .50  |
|                                     |                  | High-school      | .265    | .216  | .735  | -.33  | .86  |
|                                     |                  | Undergraduate    | .371*   | .118  | .015  | .05   | .69  |
|                                     |                  | Master/doctorate | -.006   | .175  | 1.000 | -.49  | .47  |
|                                     | High-school      | Primary sch.     | -2.190  | .903  | .109  | -4.66 | .28  |
|                                     |                  | Srednja          | -.265   | .216  | .735  | -.86  | .33  |
|                                     |                  | Undergraduate    | .105    | .203  | .986  | -.45  | .66  |
|                                     |                  | Master/doctorate | -.272   | .241  | .792  | -.93  | .39  |
|                                     | Undergraduate    | Primary sch.     | -2.296  | .884  | .072  | -4.71 | .12  |
|                                     |                  | Srednja          | -.371*  | .118  | .015  | -.69  | -.05 |
|                                     |                  | High-school      | -.105   | .203  | .986  | -.66  | .45  |
|                                     |                  | Master/doctorate | -.377   | .159  | .123  | -.81  | .06  |
|                                     | Master/doctorate | Primary sch.     | -1.919  | .894  | .201  | -4.36 | .52  |
|                                     |                  | Srednja          | .006    | .175  | 1.000 | -.47  | .49  |

|                          |                  |                  |        |      |       |       |      |
|--------------------------|------------------|------------------|--------|------|-------|-------|------|
|                          |                  | High-school      | .272   | .241 | .792  | -.39  | .93  |
|                          |                  | Undergraduate    | .377   | .159 | .123  | -.06  | .81  |
| Household nutrition plan | Primary sch.     | Srednja          | 1.675  | .849 | .279  | -.64  | 3.99 |
|                          |                  | High-school      | 1.714  | .863 | .273  | -.64  | 4.07 |
|                          |                  | Undergraduate    | 1.672  | .846 | .278  | -.64  | 3.98 |
|                          |                  | Master/doctorate | 1.405  | .855 | .469  | -.93  | 3.74 |
|                          | Srednja          | Primary sch.     | -1.675 | .849 | .279  | -3.99 | .64  |
|                          |                  | High-school      | .039   | .207 | 1.000 | -.53  | .60  |
|                          |                  | Undergraduate    | -.003  | .113 | 1.000 | -.31  | .31  |
|                          |                  | Master/doctorate | -.270  | .168 | .493  | -.73  | .19  |
|                          | High-school      | Primary sch.     | -1.714 | .863 | .273  | -4.07 | .64  |
|                          |                  | Srednja          | -.039  | .207 | 1.000 | -.60  | .53  |
|                          |                  | Undergraduate    | -.042  | .194 | 1.000 | -.57  | .49  |
|                          |                  | Master/doctorate | -.309  | .230 | .666  | -.94  | .32  |
|                          | Undergraduate    | Primary sch.     | -1.672 | .846 | .278  | -3.98 | .64  |
|                          |                  | Srednja          | .003   | .113 | 1.000 | -.31  | .31  |
|                          |                  | High-school      | .042   | .194 | 1.000 | -.49  | .57  |
|                          |                  | Master/doctorate | -.267  | .152 | .400  | -.68  | .15  |
|                          | Master/doctorate | Primary sch.     | -1.405 | .855 | .469  | -3.74 | .93  |
|                          |                  | Srednja          | .270   | .168 | .493  | -.19  | .73  |
|                          |                  | High-school      | .309   | .230 | .666  | -.32  | .94  |
|                          |                  | Undergraduate    | .267   | .152 | .400  | -.15  | .68  |
| I have groceries         | Primary sch.     | Srednja          | .975   | .687 | .615  | -.90  | 2.85 |
|                          |                  | High-school      | 1.048  | .698 | .563  | -.86  | 2.96 |
|                          |                  | Undergraduate    | .688   | .684 | .853  | -1.18 | 2.56 |
|                          |                  | Master/doctorate | .243   | .692 | .997  | -1.65 | 2.13 |
|                          | Srednja          | Primary sch.     | -.975  | .687 | .615  | -2.85 | .90  |
|                          |                  | High-school      | .073   | .167 | .993  | -.38  | .53  |
|                          |                  | Undergraduate    | -.287* | .091 | .015  | -.54  | -.04 |
|                          |                  | Master/doctorate | -.732* | .136 | .000  | -1.10 | -.36 |
|                          | High-school      | Primary sch.     | -1.048 | .698 | .563  | -2.96 | .86  |
|                          |                  | Srednja          | -.073  | .167 | .993  | -.53  | .38  |
|                          |                  | Undergraduate    | -.359  | .157 | .149  | -.79  | .07  |
|                          |                  | Master/doctorate | -.804* | .186 | .000  | -1.31 | -.29 |
|                          | Undergraduate    | Primary sch.     | -.688  | .684 | .853  | -2.56 | 1.18 |
|                          |                  | Srednja          | .287*  | .091 | .015  | .04   | .54  |
|                          |                  | High-school      | .359   | .157 | .149  | -.07  | .79  |
|                          |                  | Master/doctorate | -.445* | .123 | .003  | -.78  | -.11 |
|                          | Master/doctorate | Primary sch.     | -.243  | .692 | .997  | -2.13 | 1.65 |
|                          |                  | Srednja          | .732*  | .136 | .000  | .36   | 1.10 |
|                          |                  | High-school      | .804*  | .186 | .000  | .29   | 1.31 |
|                          |                  | Undergraduate    | .445*  | .123 | .003  | .11   | .78  |

|                                                          |                  |                  |        |      |      |       |      |
|----------------------------------------------------------|------------------|------------------|--------|------|------|-------|------|
| I have enough supplies                                   | Primary sch.     | Srednja          | 1.775  | .848 | .224 | -.54  | 4.09 |
|                                                          |                  | High-school      | 1.905  | .862 | .177 | -.45  | 4.26 |
|                                                          |                  | Undergraduate    | 1.231  | .845 | .591 | -1.08 | 3.54 |
|                                                          |                  | Master/doctorate | .946   | .854 | .803 | -1.39 | 3.28 |
|                                                          | Srednja          | Primary sch.     | -1.775 | .848 | .224 | -4.09 | .54  |
|                                                          |                  | High-school      | .130   | .207 | .971 | -.43  | .69  |
|                                                          |                  | Undergraduate    | -.544* | .113 | .000 | -.85  | -.24 |
|                                                          |                  | Master/doctorate | -.829* | .168 | .000 | -1.29 | -.37 |
|                                                          | High-school      | Primary sch.     | -1.905 | .862 | .177 | -4.26 | .45  |
|                                                          |                  | Srednja          | -.130  | .207 | .971 | -.69  | .43  |
|                                                          |                  | Undergraduate    | -.674* | .194 | .005 | -1.20 | -.14 |
|                                                          |                  | Master/doctorate | -.959* | .230 | .000 | -1.59 | -.33 |
|                                                          | Undergraduate    | Primary sch.     | -1.231 | .845 | .591 | -3.54 | 1.08 |
|                                                          |                  | Srednja          | .544*  | .113 | .000 | .24   | .85  |
|                                                          |                  | High-school      | .674*  | .194 | .005 | .14   | 1.20 |
|                                                          |                  | Master/doctorate | -.285  | .152 | .329 | -.70  | .13  |
|                                                          | Master/doctorate | Primary sch.     | -.946  | .854 | .803 | -3.28 | 1.39 |
|                                                          |                  | Srednja          | .829*  | .168 | .000 | .37   | 1.29 |
|                                                          |                  | High-school      | .959*  | .230 | .000 | .33   | 1.59 |
|                                                          |                  | Undergraduate    | .285   | .152 | .329 | -.13  | .70  |
| *. The mean difference is significant at the 0.05 level. |                  |                  |        |      |      |       |      |

Anova test for age

| ANOVA                   |                |                |     |             |       |      |
|-------------------------|----------------|----------------|-----|-------------|-------|------|
|                         |                | Sum of Squares | df  | Mean Square | F     | Sig. |
| Individual preparedness | Between Groups | 16.368         | 3   | 5.456       | 6.897 | .000 |
|                         | Within Groups  | 763.354        | 965 | .791        |       |      |
|                         | Total          | 779.721        | 968 |             |       |      |
| Household preparedness  | Between Groups | 5.614          | 3   | 1.871       | 2.140 | .094 |
|                         | Within Groups  | 843.934        | 965 | .875        |       |      |
|                         | Total          | 849.548        | 968 |             |       |      |
| Community preparedness  | Between Groups | 14.830         | 3   | 4.943       | 4.736 | .003 |

|                                |                |          |     |        |        |      |
|--------------------------------|----------------|----------|-----|--------|--------|------|
|                                | Within Groups  | 1007.232 | 965 | 1.044  |        |      |
|                                | Total          | 1022.062 | 968 |        |        |      |
| State preparedness             | Between Groups | 8.530    | 3   | 2.843  | 2.623  | .049 |
|                                | Within Groups  | 1046.058 | 965 | 1.084  |        |      |
|                                | Total          | 1054.588 | 968 |        |        |      |
| Enough personal knowledge      | Between Groups | 28.815   | 3   | 9.605  | 10.651 | .000 |
|                                | Within Groups  | 870.219  | 965 | .902   |        |      |
|                                | Total          | 899.034  | 968 |        |        |      |
| Enough personal training       | Between Groups | 35.786   | 3   | 11.929 | 10.667 | .000 |
|                                | Within Groups  | 1079.100 | 965 | 1.118  |        |      |
|                                | Total          | 1114.885 | 968 |        |        |      |
| Enough food supplies           | Between Groups | 54.378   | 3   | 18.126 | 14.633 | .000 |
|                                | Within Groups  | 1195.349 | 965 | 1.239  |        |      |
|                                | Total          | 1249.728 | 968 |        |        |      |
| Enough of req. prot. equipment | Between Groups | 8.663    | 3   | 2.888  | 1.873  | .132 |
|                                | Within Groups  | 1487.566 | 965 | 1.542  |        |      |
|                                | Total          | 1496.229 | 968 |        |        |      |
| Personal response plans        | Between Groups | 19.110   | 3   | 6.370  | 5.666  | .001 |
|                                | Within Groups  | 1084.909 | 965 | 1.124  |        |      |
|                                | Total          | 1104.019 | 968 |        |        |      |
| Enough household knowledge     | Between Groups | 16.301   | 3   | 5.434  | 5.961  | .001 |
|                                | Within Groups  | 879.668  | 965 | .912   |        |      |
|                                | Total          | 895.969  | 968 |        |        |      |

|                                  |                   |          |     |        |        |      |
|----------------------------------|-------------------|----------|-----|--------|--------|------|
| First responders<br>preparedness | Between<br>Groups | 28.351   | 3   | 9.450  | 9.222  | .000 |
|                                  | Within<br>Groups  | 988.955  | 965 | 1.025  |        |      |
|                                  | Total             | 1017.307 | 968 |        |        |      |
| Television                       | Between<br>Groups | 36.330   | 3   | 12.110 | 8.931  | .000 |
|                                  | Within<br>Groups  | 1308.543 | 965 | 1.356  |        |      |
|                                  | Total             | 1344.873 | 968 |        |        |      |
| Radio                            | Between<br>Groups | 21.766   | 3   | 7.255  | 6.461  | .000 |
|                                  | Within<br>Groups  | 1083.664 | 965 | 1.123  |        |      |
|                                  | Total             | 1105.430 | 968 |        |        |      |
| Newspaper                        | Between<br>Groups | 15.906   | 3   | 5.302  | 3.137  | .025 |
|                                  | Within<br>Groups  | 1631.011 | 965 | 1.690  |        |      |
|                                  | Total             | 1646.916 | 968 |        |        |      |
| Internet                         | Between<br>Groups | 21.923   | 3   | 7.308  | 7.688  | .000 |
|                                  | Within<br>Groups  | 917.216  | 965 | .950   |        |      |
|                                  | Total             | 939.139  | 968 |        |        |      |
| Scientific journal               | Between<br>Groups | 31.655   | 3   | 10.552 | 5.117  | .002 |
|                                  | Within<br>Groups  | 1989.713 | 965 | 2.062  |        |      |
|                                  | Total             | 2021.368 | 968 |        |        |      |
| Local medical website            | Between<br>Groups | 29.056   | 3   | 9.685  | 5.257  | .001 |
|                                  | Within<br>Groups  | 1777.742 | 965 | 1.842  |        |      |
|                                  | Total             | 1806.799 | 968 |        |        |      |
| Addressing of a statesman        | Between<br>Groups | 74.731   | 3   | 24.910 | 17.209 | .000 |
|                                  | Within<br>Groups  | 1396.885 | 965 | 1.448  |        |      |

|                         |                |          |     |        |        |      |
|-------------------------|----------------|----------|-----|--------|--------|------|
|                         | Total          | 1471.616 | 968 |        |        |      |
| Addressing of an expert | Between Groups | 7.451    | 3   | 2.484  | 3.498  | .015 |
|                         | Within Groups  | 685.112  | 965 | .710   |        |      |
|                         | Total          | 692.563  | 968 |        |        |      |
| The social network      | Between Groups | 9.349    | 3   | 3.116  | 1.571  | .195 |
|                         | Within Groups  | 1914.292 | 965 | 1.984  |        |      |
|                         | Total          | 1923.641 | 968 |        |        |      |
| Family members          | Between Groups | 10.426   | 3   | 3.475  | 2.266  | .079 |
|                         | Within Groups  | 1480.138 | 965 | 1.534  |        |      |
|                         | Total          | 1490.563 | 968 |        |        |      |
| Friends                 | Between Groups | 49.298   | 3   | 16.433 | 11.237 | .000 |
|                         | Within Groups  | 1411.191 | 965 | 1.462  |        |      |
|                         | Total          | 1460.489 | 968 |        |        |      |
| Local community         | Between Groups | .987     | 3   | .329   | .218   | .884 |
|                         | Within Groups  | 1457.793 | 965 | 1.511  |        |      |
|                         | Total          | 1458.780 | 968 |        |        |      |
| Chosen physician        | Between Groups | 12.955   | 3   | 4.318  | 2.614  | .050 |
|                         | Within Groups  | 1594.116 | 965 | 1.652  |        |      |
|                         | Total          | 1607.071 | 968 |        |        |      |
| First responders        | Between Groups | 80.996   | 3   | 26.999 | 14.755 | .000 |
|                         | Within Groups  | 1765.723 | 965 | 1.830  |        |      |
|                         | Total          | 1846.718 | 968 |        |        |      |
| Non-government org.     | Between Groups | 11.972   | 3   | 3.991  | 3.430  | .017 |

|                           |                |          |     |        |        |      |
|---------------------------|----------------|----------|-----|--------|--------|------|
|                           | Within Groups  | 1122.808 | 965 | 1.164  |        |      |
|                           | Total          | 1134.780 | 968 |        |        |      |
| Educational institutions  | Between Groups | 104.629  | 3   | 34.876 | 19.007 | .000 |
|                           | Within Groups  | 1770.678 | 965 | 1.835  |        |      |
|                           | Total          | 1875.307 | 968 |        |        |      |
| The likelihood of infect. | Between Groups | 23.547   | 3   | 7.849  | 6.325  | .000 |
|                           | Within Groups  | 1197.444 | 965 | 1.241  |        |      |
|                           | Total          | 1220.991 | 968 |        |        |      |
| Respiratory problems      | Between Groups | 18.495   | 3   | 6.165  | 5.234  | .001 |
|                           | Within Groups  | 1136.625 | 965 | 1.178  |        |      |
|                           | Total          | 1155.121 | 968 |        |        |      |
| Most severe symptoms      | Between Groups | 3.958    | 3   | 1.319  | 2.449  | .062 |
|                           | Within Groups  | 519.900  | 965 | .539   |        |      |
|                           | Total          | 523.858  | 968 |        |        |      |
| Serious health            | Between Groups | 5.914    | 3   | 1.971  | 1.862  | .134 |
|                           | Within Groups  | 1021.702 | 965 | 1.059  |        |      |
|                           | Total          | 1027.616 | 968 |        |        |      |
| Kindergarten or school    | Between Groups | 6.725    | 3   | 2.242  | 4.134  | .006 |
|                           | Within Groups  | 523.207  | 965 | .542   |        |      |
|                           | Total          | 529.932  | 968 |        |        |      |
| A place of greater risk   | Between Groups | 225.051  | 3   | 75.017 | 37.273 | .000 |
|                           | Within Groups  | 1942.212 | 965 | 2.013  |        |      |
|                           | Total          | 2167.263 | 968 |        |        |      |

|                        |                |          |     |       |       |      |
|------------------------|----------------|----------|-----|-------|-------|------|
| Losing my job          | Between Groups | 18.934   | 3   | 6.311 | 2.868 | .036 |
|                        | Within Groups  | 2123.735 | 965 | 2.201 |       |      |
|                        | Total          | 2142.669 | 968 |       |       |      |
| Prevent behavior       | Between Groups | 16.433   | 3   | 5.478 | 9.411 | .000 |
|                        | Within Groups  | 561.703  | 965 | .582  |       |      |
|                        | Total          | 578.136  | 968 |       |       |      |
| The responsibility     | Between Groups | 12.472   | 3   | 4.157 | 7.338 | .000 |
|                        | Within Groups  | 546.754  | 965 | .567  |       |      |
|                        | Total          | 559.226  | 968 |       |       |      |
| Respecting measures    | Between Groups | 7.551    | 3   | 2.517 | 1.436 | .231 |
|                        | Within Groups  | 1691.118 | 965 | 1.752 |       |      |
|                        | Total          | 1698.669 | 968 |       |       |      |
| Information critically | Between Groups | 4.942    | 3   | 1.647 | 1.530 | .205 |
|                        | Within Groups  | 1038.668 | 965 | 1.076 |       |      |
|                        | Total          | 1043.610 | 968 |       |       |      |
| I'm afraid of health   | Between Groups | 4.811    | 3   | 1.604 | 1.519 | .208 |
|                        | Within Groups  | 1018.812 | 965 | 1.056 |       |      |
|                        | Total          | 1023.622 | 968 |       |       |      |
| Econ. consequences     | Between Groups | 7.559    | 3   | 2.520 | 2.902 | .034 |
|                        | Within Groups  | 837.828  | 965 | .868  |       |      |
|                        | Total          | 845.387  | 968 |       |       |      |
| Fear of restrictions   | Between Groups | 11.821   | 3   | 3.940 | 2.283 | .078 |
|                        | Within Groups  | 1665.374 | 965 | 1.726 |       |      |

|                                        |                |          |     |        |       |      |
|----------------------------------------|----------------|----------|-----|--------|-------|------|
|                                        | Total          | 1677.195 | 968 |        |       |      |
| I wash my hands with soap              | Between Groups | .898     | 3   | .299   | 1.001 | .392 |
|                                        | Within Groups  | 288.607  | 965 | .299   |       |      |
|                                        | Total          | 289.505  | 968 |        |       |      |
| I'm disinfecting my hands              | Between Groups | .969     | 3   | .323   | .416  | .742 |
|                                        | Within Groups  | 750.442  | 965 | .778   |       |      |
|                                        | Total          | 751.412  | 968 |        |       |      |
| I wear a protective mask               | Between Groups | 8.680    | 3   | 2.893  | 1.006 | .389 |
|                                        | Within Groups  | 2775.673 | 965 | 2.876  |       |      |
|                                        | Total          | 2784.353 | 968 |        |       |      |
| I wear protective gloves               | Between Groups | 18.841   | 3   | 6.280  | 2.253 | .081 |
|                                        | Within Groups  | 2689.760 | 965 | 2.787  |       |      |
|                                        | Total          | 2708.601 | 968 |        |       |      |
| I don't touch my face                  | Between Groups | 5.341    | 3   | 1.780  | 1.295 | .275 |
|                                        | Within Groups  | 1326.974 | 965 | 1.375  |       |      |
|                                        | Total          | 1332.316 | 968 |        |       |      |
| I don't shake hands with acquaintances | Between Groups | 15.339   | 3   | 5.113  | 7.131 | .000 |
|                                        | Within Groups  | 691.955  | 965 | .717   |       |      |
|                                        | Total          | 707.294  | 968 |        |       |      |
| I'm not hugging others                 | Between Groups | 18.067   | 3   | 6.022  | 4.409 | .004 |
|                                        | Within Groups  | 1318.019 | 965 | 1.366  |       |      |
|                                        | Total          | 1336.087 | 968 |        |       |      |
| I do not kiss others                   | Between Groups | 35.890   | 3   | 11.963 | 8.066 | .000 |

|                                           |                |          |     |        |        |      |
|-------------------------------------------|----------------|----------|-----|--------|--------|------|
|                                           | Within Groups  | 1431.230 | 965 | 1.483  |        |      |
|                                           | Total          | 1467.121 | 968 |        |        |      |
| Maintaining recommended distance          | Between Groups | 67.183   | 3   | 22.394 | 18.577 | .000 |
|                                           | Within Groups  | 1163.300 | 965 | 1.205  |        |      |
|                                           | Total          | 1230.483 | 968 |        |        |      |
| I respect movement restrictions           | Between Groups | 2.585    | 3   | .862   | 4.319  | .005 |
|                                           | Within Groups  | 192.554  | 965 | .200   |        |      |
|                                           | Total          | 195.139  | 968 |        |        |      |
| I avoid contacts with the elderly         | Between Groups | 31.571   | 3   | 10.524 | 15.465 | .000 |
|                                           | Within Groups  | 656.683  | 965 | .681   |        |      |
|                                           | Total          | 688.254  | 968 |        |        |      |
| I don't meet with family members          | Between Groups | 10.047   | 3   | 3.349  | 2.279  | .078 |
|                                           | Within Groups  | 1417.805 | 965 | 1.469  |        |      |
|                                           | Total          | 1427.851 | 968 |        |        |      |
| I use disinfectants for clothes and shoes | Between Groups | 29.383   | 3   | 9.794  | 4.972  | .002 |
|                                           | Within Groups  | 1901.019 | 965 | 1.970  |        |      |
|                                           | Total          | 1930.402 | 968 |        |        |      |
| Disinfection of pets paws                 | Between Groups | 50.103   | 3   | 16.701 | 5.290  | .001 |
|                                           | Within Groups  | 3046.566 | 965 | 3.157  |        |      |
|                                           | Total          | 3096.669 | 968 |        |        |      |
| I have no contacts with pets              | Between Groups | 162.292  | 3   | 54.097 | 17.638 | .000 |
|                                           | Within Groups  | 2959.677 | 965 | 3.067  |        |      |
|                                           | Total          | 3121.969 | 968 |        |        |      |

|                                  |                |          |     |        |        |      |
|----------------------------------|----------------|----------|-----|--------|--------|------|
| Plan isolation household members | Between Groups | 39.920   | 3   | 13.307 | 5.735  | .001 |
|                                  | Within Groups  | 2238.965 | 965 | 2.320  |        |      |
|                                  | Total          | 2278.885 | 968 |        |        |      |
| Household nutrition plan         | Between Groups | 95.944   | 3   | 31.981 | 15.646 | .000 |
|                                  | Within Groups  | 1972.458 | 965 | 2.044  |        |      |
|                                  | Total          | 2068.402 | 968 |        |        |      |
| I have groceries                 | Between Groups | 16.734   | 3   | 5.578  | 3.888  | .009 |
|                                  | Within Groups  | 1384.573 | 965 | 1.435  |        |      |
|                                  | Total          | 1401.307 | 968 |        |        |      |
| I have stock for a month         | Between Groups | 25.744   | 3   | 8.581  | 3.901  | .009 |
|                                  | Within Groups  | 2122.739 | 965 | 2.200  |        |      |
|                                  | Total          | 2148.483 | 968 |        |        |      |

Explanations – 1 (18-28), 2 (29-38), 3 (39-48), 4 (49-58), 5 (over 59)

| Multiple Comparisons    |         |         |                       |            |       |                         |             |
|-------------------------|---------|---------|-----------------------|------------|-------|-------------------------|-------------|
| Tukey HSD               |         |         |                       |            |       |                         |             |
| Dependent Variable      | (I) Age | (J) Age | Mean Difference (I-J) | Std. Error | Sig.  | 95% Confidence Interval |             |
|                         |         |         |                       |            |       | Lower Bound             | Upper Bound |
| Individual preparedness | 1       | 2       | -.279*                | .086       | .011  | -.51                    | -.04        |
|                         |         | 3       | -.350*                | .099       | .004  | -.62                    | -.08        |
|                         |         | 4       | .016                  | .137       | 1.000 | -.36                    | .39         |
|                         |         | 5       | -1.017*               | .364       | .042  | -2.01                   | -.02        |
|                         | 2       | 1       | .279*                 | .086       | .011  | .04                     | .51         |
|                         |         | 3       | -.071                 | .123       | .978  | -.41                    | .26         |
|                         |         | 4       | .295                  | .154       | .310  | -.13                    | .72         |
|                         |         | 5       | -.738                 | .371       | .272  | -1.75                   | .28         |
|                         | 3       | 1       | .350*                 | .099       | .004  | .08                     | .62         |
|                         |         | 2       | .071                  | .123       | .978  | -.26                    | .41         |
|                         |         | 4       | .367                  | .162       | .158  | -.08                    | .81         |
|                         |         | 5       | -.667                 | .374       | .385  | -1.69                   | .36         |

|                        |   |   |         |      |       |       |      |
|------------------------|---|---|---------|------|-------|-------|------|
|                        | 4 | 1 | -.016   | .137 | 1.000 | -.39  | .36  |
|                        |   | 2 | -.295   | .154 | .310  | -.72  | .13  |
|                        |   | 3 | -.367   | .162 | .158  | -.81  | .08  |
|                        |   | 5 | -1.033  | .386 | .058  | -2.09 | .02  |
|                        | 5 | 1 | 1.017*  | .364 | .042  | .02   | 2.01 |
|                        |   | 2 | .738    | .371 | .272  | -.28  | 1.75 |
|                        |   | 3 | .667    | .374 | .385  | -.36  | 1.69 |
|                        |   | 4 | 1.033   | .386 | .058  | -.02  | 2.09 |
| Household preparedness | 1 | 2 | -.208   | .090 | .143  | -.46  | .04  |
|                        |   | 3 | -.137   | .104 | .684  | -.42  | .15  |
|                        |   | 4 | -.004   | .144 | 1.000 | -.40  | .39  |
|                        |   | 5 | -.970   | .383 | .084  | -2.02 | .08  |
|                        | 2 | 1 | .208    | .090 | .143  | -.04  | .46  |
|                        |   | 3 | .071    | .129 | .981  | -.28  | .42  |
|                        |   | 4 | .205    | .162 | .714  | -.24  | .65  |
|                        |   | 5 | -.762   | .390 | .290  | -1.83 | .30  |
|                        | 3 | 1 | .137    | .104 | .684  | -.15  | .42  |
|                        |   | 2 | -.071   | .129 | .981  | -.42  | .28  |
|                        |   | 4 | .133    | .170 | .936  | -.33  | .60  |
|                        |   | 5 | -.833   | .394 | .214  | -1.91 | .24  |
|                        | 4 | 1 | .004    | .144 | 1.000 | -.39  | .40  |
|                        |   | 2 | -.205   | .162 | .714  | -.65  | .24  |
|                        |   | 3 | -.133   | .170 | .936  | -.60  | .33  |
|                        |   | 5 | -.967   | .406 | .121  | -2.08 | .14  |
|                        | 5 | 1 | .970    | .383 | .084  | -.08  | 2.02 |
|                        |   | 2 | .762    | .390 | .290  | -.30  | 1.83 |
|                        |   | 3 | .833    | .394 | .214  | -.24  | 1.91 |
|                        |   | 4 | .967    | .406 | .121  | -.14  | 2.08 |
| Community preparedness | 1 | 2 | .271*   | .099 | .048  | .00   | .54  |
|                        |   | 3 | -.229   | .114 | .266  | -.54  | .08  |
|                        |   | 4 | .171    | .157 | .812  | -.26  | .60  |
|                        |   | 5 | -1.229* | .419 | .028  | -2.37 | -.08 |
|                        | 2 | 1 | -.271*  | .099 | .048  | -.54  | .00  |
|                        |   | 3 | -.500*  | .141 | .004  | -.89  | -.11 |
|                        |   | 4 | -.100   | .177 | .980  | -.59  | .39  |
|                        |   | 5 | -1.500* | .427 | .004  | -2.67 | -.33 |
|                        | 3 | 1 | .229    | .114 | .266  | -.08  | .54  |
|                        |   | 2 | .500*   | .141 | .004  | .11   | .89  |
|                        |   | 4 | .400    | .187 | .203  | -.11  | .91  |
|                        |   | 5 | -1.000  | .431 | .139  | -2.18 | .18  |
|                        | 4 | 1 | -.171   | .157 | .812  | -.60  | .26  |
|                        |   | 2 | .100    | .177 | .980  | -.39  | .59  |
|                        |   | 3 | -.400   | .187 | .203  | -.91  | .11  |
|                        |   | 5 | -1.400* | .444 | .014  | -2.61 | -.19 |
|                        | 5 | 1 | 1.229*  | .419 | .028  | .08   | 2.37 |
|                        |   | 2 | 1.500*  | .427 | .004  | .33   | 2.67 |
|                        |   | 3 | 1.000   | .431 | .139  | -.18  | 2.18 |
|                        |   | 4 | 1.400*  | .444 | .014  | .19   | 2.61 |
| State preparedness     | 1 | 2 | .280*   | .101 | .044  | .00   | .56  |
|                        |   | 3 | .028    | .117 | .999  | -.29  | .35  |
|                        |   | 4 | .094    | .160 | .977  | -.34  | .53  |

|                           |   |   |         |      |      |       |      |
|---------------------------|---|---|---------|------|------|-------|------|
|                           | 2 | 5 | -.839   | .427 | .284 | -2.01 | .33  |
|                           |   | 1 | -.280*  | .101 | .044 | -.56  | .00  |
|                           |   | 3 | -.252   | .144 | .400 | -.65  | .14  |
|                           |   | 4 | -.186   | .181 | .843 | -.68  | .31  |
|                           |   | 5 | -1.119  | .435 | .076 | -2.31 | .07  |
|                           | 3 | 1 | -.028   | .117 | .999 | -.35  | .29  |
|                           |   | 2 | .252    | .144 | .400 | -.14  | .65  |
|                           |   | 4 | .067    | .190 | .997 | -.45  | .59  |
|                           |   | 5 | -.867   | .439 | .280 | -2.07 | .33  |
|                           | 4 | 1 | -.094   | .160 | .977 | -.53  | .34  |
|                           |   | 2 | .186    | .181 | .843 | -.31  | .68  |
|                           |   | 3 | -.067   | .190 | .997 | -.59  | .45  |
|                           |   | 5 | -.933   | .453 | .238 | -2.17 | .30  |
|                           | 5 | 1 | .839    | .427 | .284 | -.33  | 2.01 |
|                           |   | 2 | 1.119   | .435 | .076 | -.07  | 2.31 |
|                           |   | 3 | .867    | .439 | .280 | -.33  | 2.07 |
|                           |   | 4 | .933    | .453 | .238 | -.30  | 2.17 |
| Enough personal knowledge | 1 | 2 | -.366*  | .092 | .001 | -.62  | -.11 |
|                           |   | 3 | -.466*  | .106 | .000 | -.76  | -.18 |
|                           |   | 4 | -.232   | .146 | .503 | -.63  | .17  |
|                           |   | 5 | -.699   | .390 | .377 | -1.76 | .37  |
|                           | 2 | 1 | .366*   | .092 | .001 | .11   | .62  |
|                           |   | 3 | -.100   | .131 | .941 | -.46  | .26  |
|                           |   | 4 | .133    | .165 | .928 | -.32  | .58  |
|                           |   | 5 | -.333   | .397 | .918 | -1.42 | .75  |
|                           | 3 | 1 | .466*   | .106 | .000 | .18   | .76  |
|                           |   | 2 | .100    | .131 | .941 | -.26  | .46  |
|                           |   | 4 | .233    | .174 | .663 | -.24  | .71  |
|                           |   | 5 | -.233   | .401 | .978 | -1.33 | .86  |
|                           | 4 | 1 | .232    | .146 | .503 | -.17  | .63  |
|                           |   | 2 | -.133   | .165 | .928 | -.58  | .32  |
|                           |   | 3 | -.233   | .174 | .663 | -.71  | .24  |
|                           |   | 5 | -.467   | .413 | .791 | -1.60 | .66  |
|                           | 5 | 1 | .699    | .390 | .377 | -.37  | 1.76 |
|                           |   | 2 | .333    | .397 | .918 | -.75  | 1.42 |
|                           |   | 3 | .233    | .401 | .978 | -.86  | 1.33 |
|                           |   | 4 | .467    | .413 | .791 | -.66  | 1.60 |
| Enough personal training  | 1 | 2 | -.394*  | .102 | .001 | -.67  | -.11 |
|                           |   | 3 | -.513*  | .118 | .000 | -.84  | -.19 |
|                           |   | 4 | -.346   | .162 | .207 | -.79  | .10  |
|                           |   | 5 | -1.513* | .433 | .004 | -2.70 | -.33 |
|                           | 2 | 1 | .394*   | .102 | .001 | .11   | .67  |
|                           |   | 3 | -.119   | .146 | .925 | -.52  | .28  |
|                           |   | 4 | .048    | .183 | .999 | -.45  | .55  |
|                           |   | 5 | -1.119  | .441 | .083 | -2.32 | .09  |
|                           | 3 | 1 | .513*   | .118 | .000 | .19   | .84  |
|                           |   | 2 | .119    | .146 | .925 | -.28  | .52  |
|                           |   | 4 | .167    | .193 | .910 | -.36  | .69  |
|                           |   | 5 | -1.000  | .445 | .163 | -2.22 | .22  |
|                           | 4 | 1 | .346    | .162 | .207 | -.10  | .79  |
|                           |   | 2 | -.048   | .183 | .999 | -.55  | .45  |

|                                |   |   |         |      |       |       |      |
|--------------------------------|---|---|---------|------|-------|-------|------|
|                                |   | 3 | -.167   | .193 | .910  | -.69  | .36  |
|                                |   | 5 | -1.167  | .459 | .082  | -2.42 | .09  |
|                                | 5 | 1 | 1.513*  | .433 | .004  | .33   | 2.70 |
|                                |   | 2 | 1.119   | .441 | .083  | -.09  | 2.32 |
|                                |   | 3 | 1.000   | .445 | .163  | -.22  | 2.22 |
|                                |   | 4 | 1.167   | .459 | .082  | -.09  | 2.42 |
| Enough food supplies           | 1 | 2 | -.008   | .107 | 1.000 | -.30  | .29  |
|                                |   | 3 | .258    | .124 | .231  | -.08  | .60  |
|                                |   | 4 | 1.092*  | .171 | .000  | .62   | 1.56 |
|                                |   | 5 | -1.008  | .455 | .175  | -2.25 | .24  |
|                                | 2 | 1 | .008    | .107 | 1.000 | -.29  | .30  |
|                                |   | 3 | .267    | .153 | .410  | -.15  | .69  |
|                                |   | 4 | 1.100*  | .193 | .000  | .57   | 1.63 |
|                                |   | 5 | -1.000  | .464 | .198  | -2.27 | .27  |
|                                | 3 | 1 | -.258   | .124 | .231  | -.60  | .08  |
|                                |   | 2 | -.267   | .153 | .410  | -.69  | .15  |
|                                |   | 4 | .833*   | .203 | .000  | .28   | 1.39 |
|                                |   | 5 | -1.267  | .468 | .054  | -2.55 | .01  |
|                                | 4 | 1 | -1.092* | .171 | .000  | -1.56 | -.62 |
|                                |   | 2 | -1.100* | .193 | .000  | -1.63 | -.57 |
|                                |   | 3 | -.833*  | .203 | .000  | -1.39 | -.28 |
|                                |   | 5 | -2.100* | .483 | .000  | -3.42 | -.78 |
|                                | 5 | 1 | 1.008   | .455 | .175  | -.24  | 2.25 |
|                                |   | 2 | 1.000   | .464 | .198  | -.27  | 2.27 |
|                                |   | 3 | 1.267   | .468 | .054  | -.01  | 2.55 |
|                                |   | 4 | 2.100*  | .483 | .000  | .78   | 3.42 |
| Enough of req. prot. equipment | 1 | 2 | .028    | .120 | .999  | -.30  | .36  |
|                                |   | 3 | .190    | .139 | .649  | -.19  | .57  |
|                                |   | 4 | .390    | .190 | .245  | -.13  | .91  |
|                                |   | 5 | -1.377  | .508 | .053  | -2.77 | .01  |
|                                | 2 | 1 | -.028   | .120 | .999  | -.36  | .30  |
|                                |   | 3 | .162    | .171 | .878  | -.31  | .63  |
|                                |   | 4 | .362    | .215 | .446  | -.23  | .95  |
|                                |   | 5 | -1.405  | .518 | .053  | -2.82 | .01  |
|                                | 3 | 1 | -.190   | .139 | .649  | -.57  | .19  |
|                                |   | 2 | -.162   | .171 | .878  | -.63  | .31  |
|                                |   | 4 | .200    | .226 | .903  | -.42  | .82  |
|                                |   | 5 | -1.567* | .522 | .023  | -2.99 | -.14 |
|                                | 4 | 1 | -.390   | .190 | .245  | -.91  | .13  |
|                                |   | 2 | -.362   | .215 | .446  | -.95  | .23  |
|                                |   | 3 | -.200   | .226 | .903  | -.82  | .42  |
|                                |   | 5 | -1.767* | .538 | .009  | -3.24 | -.30 |
|                                | 5 | 1 | 1.377   | .508 | .053  | -.01  | 2.77 |
|                                |   | 2 | 1.405   | .518 | .053  | -.01  | 2.82 |
|                                |   | 3 | 1.567*  | .522 | .023  | .14   | 2.99 |
|                                |   | 4 | 1.767*  | .538 | .009  | .30   | 3.24 |
| Personal response plans        | 1 | 2 | -.373*  | .102 | .003  | -.65  | -.09 |
|                                |   | 3 | -.278   | .118 | .130  | -.60  | .05  |
|                                |   | 4 | -.145   | .163 | .900  | -.59  | .30  |
|                                |   | 5 | -1.445* | .434 | .008  | -2.63 | -.26 |
|                                | 2 | 1 | .373*   | .102 | .003  | .09   | .65  |

|                               |   |   |         |      |      |       |      |
|-------------------------------|---|---|---------|------|------|-------|------|
|                               |   | 3 | .095    | .146 | .966 | -.30  | .49  |
|                               |   | 4 | .229    | .184 | .726 | -.27  | .73  |
|                               |   | 5 | -1.071  | .442 | .110 | -2.28 | .14  |
|                               | 3 | 1 | .278    | .118 | .130 | -.05  | .60  |
|                               |   | 2 | -.095   | .146 | .966 | -.49  | .30  |
|                               |   | 4 | .133    | .193 | .959 | -.39  | .66  |
|                               |   | 5 | -1.167  | .446 | .068 | -2.39 | .05  |
|                               | 4 | 1 | .145    | .163 | .900 | -.30  | .59  |
|                               |   | 2 | -.229   | .184 | .726 | -.73  | .27  |
|                               |   | 3 | -.133   | .193 | .959 | -.66  | .39  |
|                               |   | 5 | -1.300* | .460 | .039 | -2.56 | -.04 |
|                               | 5 | 1 | 1.445*  | .434 | .008 | .26   | 2.63 |
|                               |   | 2 | 1.071   | .442 | .110 | -.14  | 2.28 |
|                               |   | 3 | 1.167   | .446 | .068 | -.05  | 2.39 |
|                               |   | 4 | 1.300*  | .460 | .039 | .04   | 2.56 |
| Enough household knowledge    | 1 | 2 | -.319*  | .092 | .005 | -.57  | -.07 |
|                               |   | 3 | -.281   | .107 | .066 | -.57  | .01  |
|                               |   | 4 | .086    | .147 | .977 | -.31  | .49  |
|                               |   | 5 | -1.081* | .391 | .046 | -2.15 | -.01 |
|                               | 2 | 1 | .319*   | .092 | .005 | .07   | .57  |
|                               |   | 3 | .038    | .132 | .998 | -.32  | .40  |
|                               |   | 4 | .405    | .166 | .104 | -.05  | .86  |
|                               |   | 5 | -.762   | .398 | .311 | -1.85 | .33  |
|                               | 3 | 1 | .281    | .107 | .066 | -.01  | .57  |
|                               |   | 2 | -.038   | .132 | .998 | -.40  | .32  |
|                               |   | 4 | .367    | .174 | .218 | -.11  | .84  |
|                               |   | 5 | -.800   | .402 | .271 | -1.90 | .30  |
|                               | 4 | 1 | -.086   | .147 | .977 | -.49  | .31  |
|                               |   | 2 | -.405   | .166 | .104 | -.86  | .05  |
|                               |   | 3 | -.367   | .174 | .218 | -.84  | .11  |
|                               |   | 5 | -1.167* | .414 | .040 | -2.30 | -.03 |
|                               | 5 | 1 | 1.081*  | .391 | .046 | .01   | 2.15 |
|                               |   | 2 | .762    | .398 | .311 | -.33  | 1.85 |
|                               |   | 3 | .800    | .402 | .271 | -.30  | 1.90 |
|                               |   | 4 | 1.167*  | .414 | .040 | .03   | 2.30 |
| First responders preparedness | 1 | 2 | .394*   | .098 | .001 | .13   | .66  |
|                               |   | 3 | .427*   | .113 | .002 | .12   | .74  |
|                               |   | 4 | .227    | .156 | .589 | -.20  | .65  |
|                               |   | 5 | -.106   | .415 | .999 | -1.24 | 1.03 |
|                               | 2 | 1 | -.394*  | .098 | .001 | -.66  | -.13 |
|                               |   | 3 | .033    | .140 | .999 | -.35  | .42  |
|                               |   | 4 | -.167   | .176 | .878 | -.65  | .31  |
|                               |   | 5 | -.500   | .423 | .762 | -1.66 | .66  |
|                               | 3 | 1 | -.427*  | .113 | .002 | -.74  | -.12 |
|                               |   | 2 | -.033   | .140 | .999 | -.42  | .35  |
|                               |   | 4 | -.200   | .185 | .816 | -.71  | .31  |
|                               |   | 5 | -.533   | .427 | .723 | -1.70 | .63  |
|                               | 4 | 1 | -.227   | .156 | .589 | -.65  | .20  |
|                               |   | 2 | .167    | .176 | .878 | -.31  | .65  |
|                               |   | 3 | .200    | .185 | .816 | -.31  | .71  |
|                               |   | 5 | -.333   | .440 | .943 | -1.54 | .87  |

|                                                          |   |   |      |      |      |       |      |
|----------------------------------------------------------|---|---|------|------|------|-------|------|
|                                                          | 5 | 1 | .106 | .415 | .999 | -1.03 | 1.24 |
|                                                          |   | 2 | .500 | .423 | .762 | -.66  | 1.66 |
|                                                          |   | 3 | .533 | .427 | .723 | -.63  | 1.70 |
|                                                          |   | 4 | .333 | .440 | .943 | -.87  | 1.54 |
| *. The mean difference is significant at the 0.05 level. |   |   |      |      |      |       |      |

| Multiple Comparisons |         |                              |                       |            |      |                         |             |
|----------------------|---------|------------------------------|-----------------------|------------|------|-------------------------|-------------|
| Tukey HSD            |         |                              |                       |            |      |                         |             |
| Dependent Variable   | (I) Age | (J) RD_godine_ispitanika_new | Mean Difference (I-J) | Std. Error | Sig. | 95% Confidence Interval |             |
|                      |         |                              |                       |            |      | Lower Bound             | Upper Bound |
| Television           | 1       | 2                            | .392*                 | .112       | .005 | .08                     | .70         |
|                      |         | 3                            | .554*                 | .130       | .000 | .20                     | .91         |
|                      |         | 4                            | .121                  | .179       | .962 | -.37                    | .61         |
|                      |         | 5                            | -.513                 | .476       | .819 | -1.81                   | .79         |
|                      | 2       | 1                            | -.392*                | .112       | .005 | -.70                    | -.08        |
|                      |         | 3                            | .162                  | .160       | .851 | -.28                    | .60         |
|                      |         | 4                            | -.271                 | .202       | .663 | -.82                    | .28         |
|                      |         | 5                            | -.905                 | .486       | .338 | -2.23                   | .42         |
|                      | 3       | 1                            | -.554*                | .130       | .000 | -.91                    | -.20        |
|                      |         | 2                            | -.162                 | .160       | .851 | -.60                    | .28         |
|                      |         | 4                            | -.433                 | .212       | .247 | -1.01                   | .15         |
|                      |         | 5                            | -1.067                | .490       | .189 | -2.41                   | .27         |
|                      | 4       | 1                            | -.121                 | .179       | .962 | -.61                    | .37         |
|                      |         | 2                            | .271                  | .202       | .663 | -.28                    | .82         |
|                      |         | 3                            | .433                  | .212       | .247 | -.15                    | 1.01        |
|                      |         | 5                            | -.633                 | .505       | .720 | -2.01                   | .75         |
|                      | 5       | 1                            | .513                  | .476       | .819 | -.79                    | 1.81        |
|                      |         | 2                            | .905                  | .486       | .338 | -.42                    | 2.23        |
|                      |         | 3                            | 1.067                 | .490       | .189 | -.27                    | 2.41        |
|                      |         | 4                            | .633                  | .505       | .720 | -.75                    | 2.01        |
| Radio                | 1       | 2                            | .036                  | .102       | .997 | -.24                    | .32         |
|                      |         | 3                            | .417*                 | .119       | .004 | .09                     | .74         |
|                      |         | 4                            | -.383                 | .163       | .130 | -.83                    | .06         |
|                      |         | 5                            | -2.250*               | .435       | .000 | -3.44                   | -1.06       |
|                      | 2       | 1                            | -.036                 | .102       | .997 | -.32                    | .24         |

|           |   |   |         |      |       |       |       |
|-----------|---|---|---------|------|-------|-------|-------|
|           |   | 3 | .381    | .146 | .070  | -.02  | .78   |
|           |   | 4 | -.419   | .184 | .153  | -.92  | .08   |
|           |   | 5 | -2.286* | .443 | .000  | -3.50 | -1.08 |
|           | 3 | 1 | -.417*  | .119 | .004  | -.74  | -.09  |
|           |   | 2 | -.381   | .146 | .070  | -.78  | .02   |
|           |   | 4 | -.800*  | .194 | .000  | -1.33 | -.27  |
|           |   | 5 | -2.667* | .447 | .000  | -3.89 | -1.45 |
|           | 4 | 1 | .383    | .163 | .130  | -.06  | .83   |
|           |   | 2 | .419    | .184 | .153  | -.08  | .92   |
|           |   | 3 | .800*   | .194 | .000  | .27   | 1.33  |
|           |   | 5 | -1.867* | .461 | .001  | -3.13 | -.61  |
|           | 5 | 1 | 2.250*  | .435 | .000  | 1.06  | 3.44  |
|           |   | 2 | 2.286*  | .443 | .000  | 1.08  | 3.50  |
|           |   | 3 | 2.667*  | .447 | .000  | 1.45  | 3.89  |
|           |   | 4 | 1.867*  | .461 | .001  | .61   | 3.13  |
| Newspaper | 1 | 2 | -.197   | .126 | .516  | -.54  | .15   |
|           |   | 3 | .350    | .145 | .114  | -.05  | .75   |
|           |   | 4 | .017    | .200 | 1.000 | -.53  | .56   |
|           |   | 5 | -1.983* | .533 | .002  | -3.44 | -.53  |
|           | 2 | 1 | .197    | .126 | .516  | -.15  | .54   |
|           |   | 3 | .548*   | .179 | .020  | .06   | 1.04  |
|           |   | 4 | .214    | .226 | .877  | -.40  | .83   |
|           |   | 5 | -1.786* | .543 | .009  | -3.27 | -.30  |
|           | 3 | 1 | -.350   | .145 | .114  | -.75  | .05   |
|           |   | 2 | -.548*  | .179 | .020  | -1.04 | -.06  |
|           |   | 4 | -.333   | .237 | .624  | -.98  | .31   |
|           |   | 5 | -2.333* | .548 | .000  | -3.83 | -.84  |
|           | 4 | 1 | -.017   | .200 | 1.000 | -.56  | .53   |
|           |   | 2 | -.214   | .226 | .877  | -.83  | .40   |
|           |   | 3 | .333    | .237 | .624  | -.31  | .98   |
|           |   | 5 | -2.000* | .565 | .004  | -3.54 | -.46  |
|           | 5 | 1 | 1.983*  | .533 | .002  | .53   | 3.44  |
|           |   | 2 | 1.786*  | .543 | .009  | .30   | 3.27  |
|           |   | 3 | 2.333*  | .548 | .000  | .84   | 3.83  |
|           |   | 4 | 2.000*  | .565 | .004  | .46   | 3.54  |
| Internet  | 1 | 2 | -.257   | .094 | .050  | -.52  | .00   |
|           |   | 3 | -.238   | .109 | .187  | -.54  | .06   |
|           |   | 4 | .462*   | .150 | .018  | .05   | .87   |
|           |   | 5 | .195    | .400 | .989  | -.90  | 1.29  |
|           | 2 | 1 | .257    | .094 | .050  | .00   | .52   |
|           |   | 3 | .019    | .135 | 1.000 | -.35  | .39   |
|           |   | 4 | .719*   | .169 | .000  | .26   | 1.18  |

|                           |   |   |         |      |       |       |      |
|---------------------------|---|---|---------|------|-------|-------|------|
|                           | 3 | 5 | .452    | .408 | .801  | -.66  | 1.57 |
|                           |   | 1 | .238    | .109 | .187  | -.06  | .54  |
|                           |   | 2 | -.019   | .135 | 1.000 | -.39  | .35  |
|                           |   | 4 | .700*   | .178 | .001  | .21   | 1.19 |
|                           |   | 5 | .433    | .411 | .830  | -.69  | 1.56 |
|                           | 4 | 1 | -.462*  | .150 | .018  | -.87  | -.05 |
|                           |   | 2 | -.719*  | .169 | .000  | -1.18 | -.26 |
|                           |   | 3 | -.700*  | .178 | .001  | -1.19 | -.21 |
|                           |   | 5 | -.267   | .424 | .970  | -1.43 | .89  |
|                           | 5 | 1 | -.195   | .400 | .989  | -1.29 | .90  |
|                           |   | 2 | -.452   | .408 | .801  | -1.57 | .66  |
|                           |   | 3 | -.433   | .411 | .830  | -1.56 | .69  |
|                           |   | 4 | .267    | .424 | .970  | -.89  | 1.43 |
| Scientific journal        | 1 | 2 | -.211   | .139 | .549  | -.59  | .17  |
|                           |   | 3 | -.092   | .161 | .979  | -.53  | .35  |
|                           |   | 4 | -.825*  | .221 | .002  | -1.43 | -.22 |
|                           |   | 5 | -1.758* | .588 | .024  | -3.37 | -.15 |
|                           | 2 | 1 | .211    | .139 | .549  | -.17  | .59  |
|                           |   | 3 | .119    | .198 | .975  | -.42  | .66  |
|                           |   | 4 | -.614   | .249 | .099  | -1.30 | .07  |
|                           |   | 5 | -1.548  | .599 | .074  | -3.19 | .09  |
|                           | 3 | 1 | .092    | .161 | .979  | -.35  | .53  |
|                           |   | 2 | -.119   | .198 | .975  | -.66  | .42  |
|                           |   | 4 | -.733*  | .262 | .041  | -1.45 | -.02 |
|                           |   | 5 | -1.667* | .605 | .047  | -3.32 | -.01 |
|                           | 4 | 1 | .825*   | .221 | .002  | .22   | 1.43 |
|                           |   | 2 | .614    | .249 | .099  | -.07  | 1.30 |
|                           |   | 3 | .733*   | .262 | .041  | .02   | 1.45 |
|                           |   | 5 | -.933   | .623 | .565  | -2.64 | .77  |
|                           | 5 | 1 | 1.758*  | .588 | .024  | .15   | 3.37 |
|                           |   | 2 | 1.548   | .599 | .074  | -.09  | 3.19 |
|                           |   | 3 | 1.667*  | .605 | .047  | .01   | 3.32 |
|                           |   | 4 | .933    | .623 | .565  | -.77  | 2.64 |
| Addressing of a statesman | 1 | 2 | .657*   | .116 | .000  | .34   | .97  |
|                           |   | 3 | .571*   | .134 | .000  | .20   | .94  |
|                           |   | 4 | .638*   | .185 | .005  | .13   | 1.14 |
|                           |   | 5 | -.462   | .492 | .882  | -1.81 | .88  |
|                           | 2 | 1 | -.657*  | .116 | .000  | -.97  | -.34 |
|                           |   | 3 | -.086   | .166 | .986  | -.54  | .37  |
|                           |   | 4 | -.019   | .209 | 1.000 | -.59  | .55  |
|                           |   | 5 | -1.119  | .502 | .169  | -2.49 | .25  |
|                           | 3 | 1 | -.571*  | .134 | .000  | -.94  | -.20 |

|                            |   |   |        |      |       |       |      |
|----------------------------|---|---|--------|------|-------|-------|------|
|                            |   | 2 | .086   | .166 | .986  | -.37  | .54  |
|                            |   | 4 | .067   | .219 | .998  | -.53  | .67  |
|                            |   | 5 | -1.033 | .506 | .247  | -2.42 | .35  |
|                            | 4 | 1 | -.638* | .185 | .005  | -1.14 | -.13 |
|                            |   | 2 | .019   | .209 | 1.000 | -.55  | .59  |
|                            |   | 3 | -.067  | .219 | .998  | -.67  | .53  |
|                            |   | 5 | -1.100 | .522 | .217  | -2.53 | .33  |
|                            | 5 | 1 | .462   | .492 | .882  | -.88  | 1.81 |
|                            |   | 2 | 1.119  | .502 | .169  | -.25  | 2.49 |
|                            |   | 3 | 1.033  | .506 | .247  | -.35  | 2.42 |
|                            |   | 4 | 1.100  | .522 | .217  | -.33  | 2.53 |
| Addressing of<br>an expert | 1 | 2 | .156   | .081 | .308  | -.07  | .38  |
|                            |   | 3 | .261*  | .094 | .045  | .00   | .52  |
|                            |   | 4 | .127   | .129 | .862  | -.23  | .48  |
|                            |   | 5 | -.606  | .345 | .399  | -1.55 | .34  |
|                            | 2 | 1 | -.156  | .081 | .308  | -.38  | .07  |
|                            |   | 3 | .105   | .116 | .896  | -.21  | .42  |
|                            |   | 4 | -.029  | .146 | 1.000 | -.43  | .37  |
|                            |   | 5 | -.762  | .351 | .192  | -1.72 | .20  |
|                            | 3 | 1 | -.261* | .094 | .045  | -.52  | .00  |
|                            |   | 2 | -.105  | .116 | .896  | -.42  | .21  |
|                            |   | 4 | -.133  | .153 | .908  | -.55  | .29  |
|                            |   | 5 | -.867  | .354 | .104  | -1.84 | .10  |
|                            | 4 | 1 | -.127  | .129 | .862  | -.48  | .23  |
|                            |   | 2 | .029   | .146 | 1.000 | -.37  | .43  |
|                            |   | 3 | .133   | .153 | .908  | -.29  | .55  |
|                            |   | 5 | -.733  | .365 | .263  | -1.73 | .26  |
|                            | 5 | 1 | .606   | .345 | .399  | -.34  | 1.55 |
|                            |   | 2 | .762   | .351 | .192  | -.20  | 1.72 |
|                            |   | 3 | .867   | .354 | .104  | -.10  | 1.84 |
|                            |   | 4 | .733   | .365 | .263  | -.26  | 1.73 |
| The social<br>network      | 1 | 2 | -.017  | .136 | 1.000 | -.39  | .35  |
|                            |   | 3 | -.098  | .157 | .971  | -.53  | .33  |
|                            |   | 4 | .435   | .216 | .260  | -.16  | 1.03 |
|                            |   | 5 | -1.398 | .576 | .109  | -2.97 | .18  |
|                            | 2 | 1 | .017   | .136 | 1.000 | -.35  | .39  |
|                            |   | 3 | -.081  | .194 | .994  | -.61  | .45  |
|                            |   | 4 | .452   | .244 | .343  | -.21  | 1.12 |
|                            |   | 5 | -1.381 | .587 | .130  | -2.99 | .22  |
|                            | 3 | 1 | .098   | .157 | .971  | -.33  | .53  |
|                            |   | 2 | .081   | .194 | .994  | -.45  | .61  |
|                            |   | 4 | .533   | .257 | .230  | -.17  | 1.23 |

|                |   |   |         |       |       |       |      |
|----------------|---|---|---------|-------|-------|-------|------|
|                |   | 5 | -1.300  | .593  | .183  | -2.92 | .32  |
|                | 4 | 1 | -.435   | .216  | .260  | -1.03 | .16  |
|                |   | 2 | -.452   | .244  | .343  | -1.12 | .21  |
|                |   | 3 | -.533   | .257  | .230  | -1.23 | .17  |
|                |   | 5 | -1.833* | .611  | .023  | -3.50 | -.16 |
|                |   | 5 | 1       | 1.398 | .576  | .109  | -.18 |
|                | 2 |   | 1.381   | .587  | .130  | -.22  | 2.99 |
|                | 3 |   | 1.300   | .593  | .183  | -.32  | 2.92 |
|                | 4 |   | 1.833*  | .611  | .023  | .16   | 3.50 |
| Family members | 1 | 2 | -.234   | .119  | .286  | -.56  | .09  |
|                |   | 3 | -.244   | .138  | .396  | -.62  | .13  |
|                |   | 4 | -.210   | .190  | .803  | -.73  | .31  |
|                |   | 5 | -1.377  | .507  | .052  | -2.76 | .01  |
|                |   | 2 | 1       | .234  | .119  | .286  | -.09 |
|                | 3 |   | -.010   | .171  | 1.000 | -.48  | .46  |
|                | 4 |   | .024    | .215  | 1.000 | -.56  | .61  |
|                | 5 |   | -1.143  | .516  | .176  | -2.55 | .27  |
|                | 3 | 1 | .244    | .138  | .396  | -.13  | .62  |
|                |   | 2 | .010    | .171  | 1.000 | -.46  | .48  |
|                |   | 4 | .033    | .226  | 1.000 | -.58  | .65  |
|                |   | 5 | -1.133  | .521  | .190  | -2.56 | .29  |
|                | 4 | 1 | .210    | .190  | .803  | -.31  | .73  |
|                |   | 2 | -.024   | .215  | 1.000 | -.61  | .56  |
|                |   | 3 | -.033   | .226  | 1.000 | -.65  | .58  |
|                |   | 5 | -1.167  | .537  | .191  | -2.63 | .30  |
|                | 5 | 1 | 1.377   | .507  | .052  | -.01  | 2.76 |
|                |   | 2 | 1.143   | .516  | .176  | -.27  | 2.55 |
|                |   | 3 | 1.133   | .521  | .190  | -.29  | 2.56 |
|                |   | 4 | 1.167   | .537  | .191  | -.30  | 2.63 |
| Friends        | 1 | 2 | -.577*  | .117  | .000  | -.90  | -.26 |
|                |   | 3 | -.496*  | .135  | .002  | -.87  | -.13 |
|                |   | 4 | -.163   | .186  | .905  | -.67  | .34  |
|                |   | 5 | -1.030  | .496  | .231  | -2.38 | .32  |
|                | 2 | 1 | .577*   | .117  | .000  | .26   | .90  |
|                |   | 3 | .081    | .167  | .989  | -.37  | .54  |
|                |   | 4 | .414    | .210  | .280  | -.16  | .99  |
|                |   | 5 | -.452   | .505  | .899  | -1.83 | .93  |
|                | 3 | 1 | .496*   | .135  | .002  | .13   | .87  |
|                |   | 2 | -.081   | .167  | .989  | -.54  | .37  |
|                |   | 4 | .333    | .221  | .556  | -.27  | .94  |
|                |   | 5 | -.533   | .510  | .834  | -1.93 | .86  |
|                | 4 | 1 | .163    | .186  | .905  | -.34  | .67  |

|                     |   |   |         |      |       |       |       |
|---------------------|---|---|---------|------|-------|-------|-------|
|                     |   | 2 | -.414   | .210 | .280  | -.99  | .16   |
|                     |   | 3 | -.333   | .221 | .556  | -.94  | .27   |
|                     |   | 5 | -.867   | .525 | .466  | -2.30 | .57   |
|                     | 5 | 1 | 1.030   | .496 | .231  | -.32  | 2.38  |
|                     |   | 2 | .452    | .505 | .899  | -.93  | 1.83  |
|                     |   | 3 | .533    | .510 | .834  | -.86  | 1.93  |
|                     |   | 4 | .867    | .525 | .466  | -.57  | 2.30  |
| Local<br>community  | 1 | 2 | -.078   | .119 | .965  | -.40  | .25   |
|                     |   | 3 | .008    | .137 | 1.000 | -.37  | .38   |
|                     |   | 4 | .074    | .189 | .995  | -.44  | .59   |
|                     |   | 5 | -1.792* | .504 | .004  | -3.17 | -.42  |
|                     | 2 | 1 | .078    | .119 | .965  | -.25  | .40   |
|                     |   | 3 | .086    | .170 | .987  | -.38  | .55   |
|                     |   | 4 | .152    | .213 | .953  | -.43  | .74   |
|                     |   | 5 | -1.714* | .513 | .008  | -3.12 | -.31  |
|                     | 3 | 1 | -.008   | .137 | 1.000 | -.38  | .37   |
|                     |   | 2 | -.086   | .170 | .987  | -.55  | .38   |
|                     |   | 4 | .067    | .224 | .998  | -.55  | .68   |
|                     |   | 5 | -1.800* | .518 | .005  | -3.22 | -.38  |
|                     | 4 | 1 | -.074   | .189 | .995  | -.59  | .44   |
|                     |   | 2 | -.152   | .213 | .953  | -.74  | .43   |
|                     |   | 3 | -.067   | .224 | .998  | -.68  | .55   |
|                     |   | 5 | -1.867* | .534 | .004  | -3.33 | -.41  |
|                     | 5 | 1 | 1.792*  | .504 | .004  | .42   | 3.17  |
|                     |   | 2 | 1.714*  | .513 | .008  | .31   | 3.12  |
|                     |   | 3 | 1.800*  | .518 | .005  | .38   | 3.22  |
|                     |   | 4 | 1.867*  | .534 | .004  | .41   | 3.33  |
| Chosen<br>physician | 1 | 2 | .147    | .124 | .759  | -.19  | .49   |
|                     |   | 3 | .304    | .144 | .212  | -.09  | .70   |
|                     |   | 4 | -.262   | .197 | .672  | -.80  | .28   |
|                     |   | 5 | -2.496* | .526 | .000  | -3.93 | -1.06 |
|                     | 2 | 1 | -.147   | .124 | .759  | -.49  | .19   |
|                     |   | 3 | .157    | .177 | .901  | -.33  | .64   |
|                     |   | 4 | -.410   | .223 | .352  | -1.02 | .20   |
|                     |   | 5 | -2.643* | .536 | .000  | -4.11 | -1.18 |
|                     | 3 | 1 | -.304   | .144 | .212  | -.70  | .09   |
|                     |   | 2 | -.157   | .177 | .901  | -.64  | .33   |
|                     |   | 4 | -.567   | .234 | .111  | -1.21 | .07   |
|                     |   | 5 | -2.800* | .541 | .000  | -4.28 | -1.32 |
|                     | 4 | 1 | .262    | .197 | .672  | -.28  | .80   |
|                     |   | 2 | .410    | .223 | .352  | -.20  | 1.02  |
|                     |   | 3 | .567    | .234 | .111  | -.07  | 1.21  |

|                         |   |   |         |      |       |       |       |
|-------------------------|---|---|---------|------|-------|-------|-------|
|                         | 5 | 5 | -2.233* | .557 | .001  | -3.76 | -.71  |
|                         |   | 1 | 2.496*  | .526 | .000  | 1.06  | 3.93  |
|                         |   | 2 | 2.643*  | .536 | .000  | 1.18  | 4.11  |
|                         |   | 3 | 2.800*  | .541 | .000  | 1.32  | 4.28  |
|                         |   | 4 | 2.233*  | .557 | .001  | .71   | 3.76  |
| Members of the<br>ISS   | 1 | 2 | .732*   | .131 | .000  | .38   | 1.09  |
|                         |   | 3 | .622*   | .151 | .000  | .21   | 1.04  |
|                         |   | 4 | -.078   | .208 | .996  | -.64  | .49   |
|                         |   | 5 | -1.911* | .553 | .005  | -3.42 | -.40  |
|                         | 2 | 1 | -.732*  | .131 | .000  | -1.09 | -.38  |
|                         |   | 3 | -.110   | .186 | .977  | -.62  | .40   |
|                         |   | 4 | -.810*  | .234 | .005  | -1.45 | -.17  |
|                         |   | 5 | -2.643* | .564 | .000  | -4.18 | -1.10 |
|                         | 3 | 1 | -.622*  | .151 | .000  | -1.04 | -.21  |
|                         |   | 2 | .110    | .186 | .977  | -.40  | .62   |
|                         |   | 4 | -.700*  | .246 | .037  | -1.37 | -.03  |
|                         |   | 5 | -2.533* | .569 | .000  | -4.09 | -.98  |
|                         | 4 | 1 | .078    | .208 | .996  | -.49  | .64   |
|                         |   | 2 | .810*   | .234 | .005  | .17   | 1.45  |
|                         |   | 3 | .700*   | .246 | .037  | .03   | 1.37  |
|                         |   | 5 | -1.833* | .587 | .016  | -3.44 | -.23  |
|                         | 5 | 1 | 1.911*  | .553 | .005  | .40   | 3.42  |
|                         |   | 2 | 2.643*  | .564 | .000  | 1.10  | 4.18  |
|                         |   | 3 | 2.533*  | .569 | .000  | .98   | 4.09  |
|                         |   | 4 | 1.833*  | .587 | .016  | .23   | 3.44  |
| Non-<br>government org. | 1 | 2 | .197    | .104 | .323  | -.09  | .48   |
|                         |   | 3 | .278    | .120 | .144  | -.05  | .61   |
|                         |   | 4 | .311    | .166 | .329  | -.14  | .76   |
|                         |   | 5 | -2.589* | .441 | .000  | -3.80 | -1.38 |
|                         | 2 | 1 | -.197   | .104 | .323  | -.48  | .09   |
|                         |   | 3 | .081    | .149 | .983  | -.33  | .49   |
|                         |   | 4 | .114    | .187 | .973  | -.40  | .63   |
|                         |   | 5 | -2.786* | .450 | .000  | -4.02 | -1.56 |
|                         | 3 | 1 | -.278   | .120 | .144  | -.61  | .05   |
|                         |   | 2 | -.081   | .149 | .983  | -.49  | .33   |
|                         |   | 4 | .033    | .197 | 1.000 | -.50  | .57   |
|                         |   | 5 | -2.867* | .454 | .000  | -4.11 | -1.63 |
|                         | 4 | 1 | -.311   | .166 | .329  | -.76  | .14   |
|                         |   | 2 | -.114   | .187 | .973  | -.63  | .40   |
|                         |   | 3 | -.033   | .197 | 1.000 | -.57  | .50   |
|                         |   | 5 | -2.900* | .468 | .000  | -4.18 | -1.62 |
|                         | 5 | 1 | 2.589*  | .441 | .000  | 1.38  | 3.80  |

|                          |                                                          |   |         |      |      |       |      |  |
|--------------------------|----------------------------------------------------------|---|---------|------|------|-------|------|--|
|                          |                                                          | 2 | 2.786*  | .450 | .000 | 1.56  | 4.02 |  |
|                          |                                                          | 3 | 2.867*  | .454 | .000 | 1.63  | 4.11 |  |
|                          |                                                          | 4 | 2.900*  | .468 | .000 | 1.62  | 4.18 |  |
| Educational institutions | 1                                                        | 2 | .898*   | .131 | .000 | .54   | 1.26 |  |
|                          |                                                          | 3 | .565*   | .151 | .002 | .15   | .98  |  |
|                          |                                                          | 4 | -.102   | .208 | .988 | -.67  | .47  |  |
|                          |                                                          | 5 | -1.602* | .554 | .032 | -3.12 | -.09 |  |
|                          | 2                                                        | 1 | -.898*  | .131 | .000 | -1.26 | -.54 |  |
|                          |                                                          | 3 | -.333   | .187 | .382 | -.84  | .18  |  |
|                          |                                                          | 4 | -1.000* | .235 | .000 | -1.64 | -.36 |  |
|                          |                                                          | 5 | -2.500* | .565 | .000 | -4.04 | -.96 |  |
|                          | 3                                                        | 1 | -.565*  | .151 | .002 | -.98  | -.15 |  |
|                          |                                                          | 2 | .333    | .187 | .382 | -.18  | .84  |  |
|                          |                                                          | 4 | -.667   | .247 | .054 | -1.34 | .01  |  |
|                          |                                                          | 5 | -2.167* | .570 | .001 | -3.72 | -.61 |  |
|                          | 4                                                        | 1 | .102    | .208 | .988 | -.47  | .67  |  |
|                          |                                                          | 2 | 1.000*  | .235 | .000 | .36   | 1.64 |  |
|                          |                                                          | 3 | .667    | .247 | .054 | -.01  | 1.34 |  |
|                          |                                                          | 5 | -1.500  | .587 | .080 | -3.11 | .11  |  |
|                          | 5                                                        | 1 | 1.602*  | .554 | .032 | .09   | 3.12 |  |
|                          |                                                          | 2 | 2.500*  | .565 | .000 | .96   | 4.04 |  |
|                          |                                                          | 3 | 2.167*  | .570 | .001 | .61   | 3.72 |  |
|                          |                                                          | 4 | 1.500   | .587 | .080 | -.11  | 3.11 |  |
|                          | *. The mean difference is significant at the 0.05 level. |   |         |      |      |       |      |  |

| Multiple Comparisons         |            |            |                          |               |      |                         |                |
|------------------------------|------------|------------|--------------------------|---------------|------|-------------------------|----------------|
| Tukey HSD                    |            |            |                          |               |      |                         |                |
| Dependent Variable           | (I)<br>Age | (J)<br>Age | Mean Difference<br>(I-J) | Std.<br>Error | Sig. | 95% Confidence Interval |                |
|                              |            |            |                          |               |      | Lower<br>Bound          | Upper<br>Bound |
| The likelihood of<br>infect. | 1          | 2          | .394*                    | .108          | .002 | .10                     | .69            |
|                              |            | 3          | .351*                    | .125          | .039 | .01                     | .69            |
|                              |            | 4          | .085                     | .171          | .988 | -.38                    | .55            |
|                              |            | 5          | -.915                    | .457          | .265 | -2.16                   | .33            |
|                              | 2          | 1          | -.394*                   | .108          | .002 | -.69                    | -.10           |
|                              |            | 3          | -.043                    | .154          | .999 | -.46                    | .38            |
|                              |            | 4          | -.310                    | .193          | .498 | -.84                    | .22            |
|                              |            | 5          | -1.310*                  | .465          | .040 | -2.58                   | -.04           |

|                      |   |   |        |      |      |       |      |
|----------------------|---|---|--------|------|------|-------|------|
|                      | 3 | 1 | -.351* | .125 | .039 | -.69  | -.01 |
|                      |   | 2 | .043   | .154 | .999 | -.38  | .46  |
|                      |   | 4 | -.267  | .203 | .684 | -.82  | .29  |
|                      |   | 5 | -1.267 | .470 | .055 | -2.55 | .02  |
|                      | 4 | 1 | -.085  | .171 | .988 | -.55  | .38  |
|                      |   | 2 | .310   | .193 | .498 | -.22  | .84  |
|                      |   | 3 | .267   | .203 | .684 | -.29  | .82  |
|                      |   | 5 | -1.000 | .484 | .236 | -2.32 | .32  |
|                      | 5 | 1 | .915   | .457 | .265 | -.33  | 2.16 |
|                      |   | 2 | 1.310* | .465 | .040 | .04   | 2.58 |
|                      |   | 3 | 1.267  | .470 | .055 | -.02  | 2.55 |
|                      |   | 4 | 1.000  | .484 | .236 | -.32  | 2.32 |
| Respiratory problems | 1 | 2 | -.319* | .105 | .020 | -.61  | -.03 |
|                      |   | 3 | -.353* | .121 | .031 | -.68  | -.02 |
|                      |   | 4 | -.119  | .167 | .953 | -.58  | .34  |
|                      |   | 5 | -.653  | .445 | .585 | -1.87 | .56  |
|                      | 2 | 1 | .319*  | .105 | .020 | .03   | .61  |
|                      |   | 3 | -.033  | .150 | .999 | -.44  | .38  |
|                      |   | 4 | .200   | .188 | .826 | -.32  | .72  |
|                      |   | 5 | -.333  | .454 | .948 | -1.57 | .91  |
|                      | 3 | 1 | .353*  | .121 | .031 | .02   | .68  |
|                      |   | 2 | .033   | .150 | .999 | -.38  | .44  |
|                      |   | 4 | .233   | .198 | .764 | -.31  | .77  |
|                      |   | 5 | -.300  | .458 | .966 | -1.55 | .95  |
|                      | 4 | 1 | .119   | .167 | .953 | -.34  | .58  |
|                      |   | 2 | -.200  | .188 | .826 | -.72  | .32  |
|                      |   | 3 | -.233  | .198 | .764 | -.77  | .31  |
|                      |   | 5 | -.533  | .472 | .790 | -1.82 | .76  |
|                      | 5 | 1 | .653   | .445 | .585 | -.56  | 1.87 |
|                      |   | 2 | .333   | .454 | .948 | -.91  | 1.57 |
|                      |   | 3 | .300   | .458 | .966 | -.95  | 1.55 |
|                      |   | 4 | .533   | .472 | .790 | -.76  | 1.82 |
| Most severe symptoms | 1 | 2 | -.167  | .071 | .133 | -.36  | .03  |
|                      |   | 3 | .067   | .082 | .928 | -.16  | .29  |
|                      |   | 4 | -.100  | .113 | .903 | -.41  | .21  |
|                      |   | 5 | .500   | .302 | .462 | -.32  | 1.32 |
|                      | 2 | 1 | .167   | .071 | .133 | -.03  | .36  |
|                      |   | 3 | .233   | .102 | .147 | -.04  | .51  |
|                      |   | 4 | .067   | .128 | .985 | -.28  | .42  |

|                        |   |   |       |      |       |       |      |
|------------------------|---|---|-------|------|-------|-------|------|
|                        | 3 | 5 | .667  | .308 | .193  | -.17  | 1.51 |
|                        |   | 1 | -.067 | .082 | .928  | -.29  | .16  |
|                        |   | 2 | -.233 | .102 | .147  | -.51  | .04  |
|                        |   | 4 | -.167 | .134 | .728  | -.53  | .20  |
|                        |   | 5 | .433  | .310 | .631  | -.42  | 1.28 |
|                        | 4 | 1 | .100  | .113 | .903  | -.21  | .41  |
|                        |   | 2 | -.067 | .128 | .985  | -.42  | .28  |
|                        |   | 3 | .167  | .134 | .728  | -.20  | .53  |
|                        |   | 5 | .600  | .320 | .332  | -.27  | 1.47 |
|                        | 5 | 1 | -.500 | .302 | .462  | -1.32 | .32  |
|                        |   | 2 | -.667 | .308 | .193  | -1.51 | .17  |
|                        |   | 3 | -.433 | .310 | .631  | -1.28 | .42  |
|                        |   | 4 | -.600 | .320 | .332  | -1.47 | .27  |
| Serious health         | 1 | 2 | .028  | .100 | .999  | -.24  | .30  |
|                        |   | 3 | .228  | .116 | .279  | -.09  | .54  |
|                        |   | 4 | .228  | .159 | .604  | -.21  | .66  |
|                        |   | 5 | .195  | .424 | .991  | -.96  | 1.35 |
|                        | 2 | 1 | -.028 | .100 | .999  | -.30  | .24  |
|                        |   | 3 | .200  | .143 | .626  | -.19  | .59  |
|                        |   | 4 | .200  | .179 | .799  | -.29  | .69  |
|                        |   | 5 | .167  | .432 | .995  | -1.01 | 1.35 |
|                        | 3 | 1 | -.228 | .116 | .279  | -.54  | .09  |
|                        |   | 2 | -.200 | .143 | .626  | -.59  | .19  |
|                        |   | 4 | .000  | .189 | 1.000 | -.52  | .52  |
|                        |   | 5 | -.033 | .436 | 1.000 | -1.22 | 1.16 |
|                        | 4 | 1 | -.228 | .159 | .604  | -.66  | .21  |
|                        |   | 2 | -.200 | .179 | .799  | -.69  | .29  |
|                        |   | 3 | .000  | .189 | 1.000 | -.52  | .52  |
|                        |   | 5 | -.033 | .449 | 1.000 | -1.26 | 1.19 |
|                        | 5 | 1 | -.195 | .424 | .991  | -1.35 | .96  |
|                        |   | 2 | -.167 | .432 | .995  | -1.35 | 1.01 |
|                        |   | 3 | .033  | .436 | 1.000 | -1.16 | 1.22 |
|                        |   | 4 | .033  | .449 | 1.000 | -1.19 | 1.26 |
| Kindergarten or school | 1 | 2 | -.150 | .071 | .220  | -.34  | .04  |
|                        |   | 3 | .208  | .082 | .086  | -.02  | .43  |
|                        |   | 4 | -.026 | .113 | .999  | -.33  | .28  |
|                        |   | 5 | .208  | .302 | .959  | -.62  | 1.03 |
|                        | 2 | 1 | .150  | .071 | .220  | -.04  | .34  |
|                        |   | 3 | .357* | .102 | .004  | .08   | .63  |

|                         |   |   |         |      |       |       |      |
|-------------------------|---|---|---------|------|-------|-------|------|
|                         |   | 4 | .124    | .128 | .869  | -.23  | .47  |
|                         |   | 5 | .357    | .307 | .773  | -.48  | 1.20 |
|                         | 3 | 1 | -.208   | .082 | .086  | -.43  | .02  |
|                         |   | 2 | -.357*  | .102 | .004  | -.63  | -.08 |
|                         |   | 4 | -.233   | .134 | .411  | -.60  | .13  |
|                         |   | 5 | .000    | .310 | 1.000 | -.85  | .85  |
|                         | 4 | 1 | .026    | .113 | .999  | -.28  | .33  |
|                         |   | 2 | -.124   | .128 | .869  | -.47  | .23  |
|                         |   | 3 | .233    | .134 | .411  | -.13  | .60  |
|                         |   | 5 | .233    | .320 | .950  | -.64  | 1.11 |
|                         | 5 | 1 | -.208   | .302 | .959  | -1.03 | .62  |
|                         |   | 2 | -.357   | .307 | .773  | -1.20 | .48  |
|                         |   | 3 | .000    | .310 | 1.000 | -.85  | .85  |
|                         |   | 4 | -.233   | .320 | .950  | -1.11 | .64  |
| A place of greater risk | 1 | 2 | -.559*  | .137 | .000  | -.93  | -.19 |
|                         |   | 3 | -1.369* | .158 | .000  | -1.80 | -.94 |
|                         |   | 4 | -1.369* | .218 | .000  | -1.96 | -.77 |
|                         |   | 5 | -1.869* | .580 | .012  | -3.45 | -.28 |
|                         | 2 | 1 | .559*   | .137 | .000  | .19   | .93  |
|                         |   | 3 | -.810*  | .195 | .000  | -1.34 | -.28 |
|                         |   | 4 | -.810*  | .246 | .009  | -1.48 | -.14 |
|                         |   | 5 | -1.310  | .592 | .175  | -2.93 | .31  |
|                         | 3 | 1 | 1.369*  | .158 | .000  | .94   | 1.80 |
|                         |   | 2 | .810*   | .195 | .000  | .28   | 1.34 |
|                         |   | 4 | .000    | .258 | 1.000 | -.71  | .71  |
|                         |   | 5 | -.500   | .597 | .919  | -2.13 | 1.13 |
|                         | 4 | 1 | 1.369*  | .218 | .000  | .77   | 1.96 |
|                         |   | 2 | .810*   | .246 | .009  | .14   | 1.48 |
|                         |   | 3 | .000    | .258 | 1.000 | -.71  | .71  |
|                         |   | 5 | -.500   | .615 | .927  | -2.18 | 1.18 |
|                         | 5 | 1 | 1.869*  | .580 | .012  | .28   | 3.45 |
|                         |   | 2 | 1.310   | .592 | .175  | -.31  | 2.93 |
|                         |   | 3 | .500    | .597 | .919  | -1.13 | 2.13 |
|                         |   | 4 | .500    | .615 | .927  | -1.18 | 2.18 |
| Losing my job           | 1 | 2 | -.074   | .144 | .986  | -.47  | .32  |
|                         |   | 3 | -.188   | .166 | .789  | -.64  | .27  |
|                         |   | 4 | .579    | .228 | .084  | -.05  | 1.20 |
|                         |   | 5 | -.788   | .609 | .694  | -2.45 | .87  |
|                         | 2 | 1 | .074    | .144 | .986  | -.32  | .47  |

|                    |   |   |        |      |       |       |      |
|--------------------|---|---|--------|------|-------|-------|------|
|                    |   | 3 | -.114  | .205 | .981  | -.67  | .45  |
|                    |   | 4 | .652   | .258 | .085  | -.05  | 1.36 |
|                    |   | 5 | -.714  | .620 | .779  | -2.41 | .98  |
|                    | 3 | 1 | .188   | .166 | .789  | -.27  | .64  |
|                    |   | 2 | .114   | .205 | .981  | -.45  | .67  |
|                    |   | 4 | .767*  | .271 | .038  | .03   | 1.51 |
|                    |   | 5 | -.600  | .626 | .873  | -2.31 | 1.11 |
|                    | 4 | 1 | -.579  | .228 | .084  | -1.20 | .05  |
|                    |   | 2 | -.652  | .258 | .085  | -1.36 | .05  |
|                    |   | 3 | -.767* | .271 | .038  | -1.51 | -.03 |
|                    |   | 5 | -1.367 | .645 | .213  | -3.13 | .40  |
|                    | 5 | 1 | .788   | .609 | .694  | -.87  | 2.45 |
|                    |   | 2 | .714   | .620 | .779  | -.98  | 2.41 |
|                    |   | 3 | .600   | .626 | .873  | -1.11 | 2.31 |
|                    |   | 4 | 1.367  | .645 | .213  | -.40  | 3.13 |
| Prevent behavior   | 1 | 2 | -.306* | .074 | .000  | -.51  | -.10 |
|                    |   | 3 | -.301* | .085 | .004  | -.53  | -.07 |
|                    |   | 4 | -.234  | .117 | .266  | -.55  | .09  |
|                    |   | 5 | -.068  | .312 | 1.000 | -.92  | .79  |
|                    | 2 | 1 | .306*  | .074 | .000  | .10   | .51  |
|                    |   | 3 | .005   | .105 | 1.000 | -.28  | .29  |
|                    |   | 4 | .071   | .132 | .983  | -.29  | .43  |
|                    |   | 5 | .238   | .318 | .945  | -.63  | 1.11 |
|                    | 3 | 1 | .301*  | .085 | .004  | .07   | .53  |
|                    |   | 2 | -.005  | .105 | 1.000 | -.29  | .28  |
|                    |   | 4 | .067   | .139 | .989  | -.31  | .45  |
|                    |   | 5 | .233   | .321 | .950  | -.64  | 1.11 |
|                    | 4 | 1 | .234   | .117 | .266  | -.09  | .55  |
|                    |   | 2 | -.071  | .132 | .983  | -.43  | .29  |
|                    |   | 3 | -.067  | .139 | .989  | -.45  | .31  |
|                    |   | 5 | .167   | .331 | .987  | -.74  | 1.07 |
|                    | 5 | 1 | .068   | .312 | 1.000 | -.79  | .92  |
|                    |   | 2 | -.238  | .318 | .945  | -1.11 | .63  |
|                    |   | 3 | -.233  | .321 | .950  | -1.11 | .64  |
|                    |   | 4 | -.167  | .331 | .987  | -1.07 | .74  |
| The responsibility | 1 | 2 | -.221* | .073 | .020  | -.42  | -.02 |
|                    |   | 3 | -.283* | .084 | .007  | -.51  | -.05 |
|                    |   | 4 | -.283  | .116 | .103  | -.60  | .03  |
|                    |   | 5 | .017   | .308 | 1.000 | -.83  | .86  |

|                        |   |   |         |      |       |       |      |
|------------------------|---|---|---------|------|-------|-------|------|
|                        | 2 | 1 | .221*   | .073 | .020  | .02   | .42  |
|                        |   | 3 | -.062   | .104 | .976  | -.35  | .22  |
|                        |   | 4 | -.062   | .131 | .990  | -.42  | .29  |
|                        |   | 5 | .238    | .314 | .942  | -.62  | 1.10 |
|                        | 3 | 1 | .283*   | .084 | .007  | .05   | .51  |
|                        |   | 2 | .062    | .104 | .976  | -.22  | .35  |
|                        |   | 4 | .000    | .137 | 1.000 | -.38  | .38  |
|                        |   | 5 | .300    | .317 | .879  | -.57  | 1.17 |
|                        | 4 | 1 | .283    | .116 | .103  | -.03  | .60  |
|                        |   | 2 | .062    | .131 | .990  | -.29  | .42  |
|                        |   | 3 | .000    | .137 | 1.000 | -.38  | .38  |
|                        |   | 5 | .300    | .327 | .890  | -.59  | 1.19 |
|                        | 5 | 1 | -.017   | .308 | 1.000 | -.86  | .83  |
|                        |   | 2 | -.238   | .314 | .942  | -1.10 | .62  |
|                        |   | 3 | -.300   | .317 | .879  | -1.17 | .57  |
|                        |   | 4 | -.300   | .327 | .890  | -1.19 | .59  |
| Respecting measures    | 1 | 2 | .259    | .128 | .253  | -.09  | .61  |
|                        |   | 3 | .031    | .148 | 1.000 | -.37  | .43  |
|                        |   | 4 | .131    | .203 | .968  | -.42  | .69  |
|                        |   | 5 | -2.169* | .542 | .001  | -3.65 | -.69 |
|                        | 2 | 1 | -.259   | .128 | .253  | -.61  | .09  |
|                        |   | 3 | -.229   | .182 | .720  | -.73  | .27  |
|                        |   | 4 | -.129   | .229 | .981  | -.76  | .50  |
|                        |   | 5 | -2.429* | .552 | .000  | -3.94 | -.92 |
|                        | 3 | 1 | -.031   | .148 | 1.000 | -.43  | .37  |
|                        |   | 2 | .229    | .182 | .720  | -.27  | .73  |
|                        |   | 4 | .100    | .241 | .994  | -.56  | .76  |
|                        |   | 5 | -2.200* | .557 | .001  | -3.72 | -.68 |
|                        | 4 | 1 | -.131   | .203 | .968  | -.69  | .42  |
|                        |   | 2 | .129    | .229 | .981  | -.50  | .76  |
|                        |   | 3 | -.100   | .241 | .994  | -.76  | .56  |
|                        |   | 5 | -2.300* | .574 | .001  | -3.87 | -.73 |
|                        | 5 | 1 | 2.169*  | .542 | .001  | .69   | 3.65 |
|                        |   | 2 | 2.429*  | .552 | .000  | .92   | 3.94 |
|                        |   | 3 | 2.200*  | .557 | .001  | .68   | 3.72 |
|                        |   | 4 | 2.300*  | .574 | .001  | .73   | 3.87 |
| Information critically | 1 | 2 | -.079   | .100 | .933  | -.35  | .19  |
|                        |   | 3 | -.236   | .116 | .248  | -.55  | .08  |
|                        |   | 4 | .030    | .159 | 1.000 | -.40  | .47  |

|                      |   |   |        |      |       |       |      |
|----------------------|---|---|--------|------|-------|-------|------|
|                      | 2 | 5 | -.936  | .425 | .178  | -2.10 | .22  |
|                      |   | 1 | .079   | .100 | .933  | -.19  | .35  |
|                      |   | 3 | -.157  | .143 | .807  | -.55  | .23  |
|                      |   | 4 | .110   | .180 | .974  | -.38  | .60  |
|                      |   | 5 | -.857  | .433 | .276  | -2.04 | .33  |
|                      | 3 | 1 | .236   | .116 | .248  | -.08  | .55  |
|                      |   | 2 | .157   | .143 | .807  | -.23  | .55  |
|                      |   | 4 | .267   | .189 | .621  | -.25  | .78  |
|                      |   | 5 | -.700  | .437 | .496  | -1.89 | .49  |
|                      | 4 | 1 | -.030  | .159 | 1.000 | -.47  | .40  |
|                      |   | 2 | -.110  | .180 | .974  | -.60  | .38  |
|                      |   | 3 | -.267  | .189 | .621  | -.78  | .25  |
|                      |   | 5 | -.967  | .450 | .201  | -2.20 | .26  |
|                      | 5 | 1 | .936   | .425 | .178  | -.22  | 2.10 |
|                      |   | 2 | .857   | .433 | .276  | -.33  | 2.04 |
|                      |   | 3 | .700   | .437 | .496  | -.49  | 1.89 |
|                      |   | 4 | .967   | .450 | .201  | -.26  | 2.20 |
| I'm afraid of health | 1 | 2 | -.007  | .099 | 1.000 | -.28  | .26  |
|                      |   | 3 | .202   | .115 | .399  | -.11  | .52  |
|                      |   | 4 | .202   | .158 | .704  | -.23  | .63  |
|                      |   | 5 | .136   | .421 | .998  | -1.02 | 1.29 |
|                      | 2 | 1 | .007   | .099 | 1.000 | -.26  | .28  |
|                      |   | 3 | .210   | .142 | .578  | -.18  | .60  |
|                      |   | 4 | .210   | .179 | .766  | -.28  | .70  |
|                      |   | 5 | .143   | .429 | .997  | -1.03 | 1.32 |
|                      | 3 | 1 | -.202  | .115 | .399  | -.52  | .11  |
|                      |   | 2 | -.210  | .142 | .578  | -.60  | .18  |
|                      |   | 4 | .000   | .188 | 1.000 | -.51  | .51  |
|                      |   | 5 | -.067  | .433 | 1.000 | -1.25 | 1.12 |
|                      | 4 | 1 | -.202  | .158 | .704  | -.63  | .23  |
|                      |   | 2 | -.210  | .179 | .766  | -.70  | .28  |
|                      |   | 3 | .000   | .188 | 1.000 | -.51  | .51  |
|                      |   | 5 | -.067  | .447 | 1.000 | -1.29 | 1.15 |
|                      | 5 | 1 | -.136  | .421 | .998  | -1.29 | 1.02 |
|                      |   | 2 | -.143  | .429 | .997  | -1.32 | 1.03 |
|                      |   | 3 | .067   | .433 | 1.000 | -1.12 | 1.25 |
|                      |   | 4 | .067   | .447 | 1.000 | -1.15 | 1.29 |
| Econ. consequences   | 1 | 2 | -.116  | .091 | .706  | -.36  | .13  |
|                      |   | 3 | -.292* | .105 | .044  | -.58  | -.01 |

|                                                          |                      |   |         |      |       |       |      |     |
|----------------------------------------------------------|----------------------|---|---------|------|-------|-------|------|-----|
|                                                          |                      | 4 | -.025   | .144 | 1.000 | -.42  | .37  |     |
|                                                          |                      | 5 | .742    | .384 | .302  | -.31  | 1.79 |     |
|                                                          | 2                    | 1 | .116    | .091 | .706  | -.13  | .36  |     |
|                                                          |                      | 3 | -.176   | .129 | .652  | -.53  | .18  |     |
|                                                          |                      | 4 | .090    | .163 | .981  | -.35  | .54  |     |
|                                                          |                      | 5 | .857    | .391 | .184  | -.21  | 1.93 |     |
|                                                          | 3                    | 1 | .292*   | .105 | .044  | .01   | .58  |     |
|                                                          |                      | 2 | .176    | .129 | .652  | -.18  | .53  |     |
|                                                          |                      | 4 | .267    | .171 | .524  | -.20  | .73  |     |
|                                                          |                      | 5 | 1.033   | .395 | .068  | -.05  | 2.11 |     |
|                                                          | 4                    | 1 | .025    | .144 | 1.000 | -.37  | .42  |     |
|                                                          |                      | 2 | -.090   | .163 | .981  | -.54  | .35  |     |
|                                                          |                      | 3 | -.267   | .171 | .524  | -.73  | .20  |     |
|                                                          |                      | 5 | .767    | .407 | .327  | -.35  | 1.88 |     |
|                                                          | 5                    | 1 | -.742   | .384 | .302  | -1.79 | .31  |     |
|                                                          |                      | 2 | -.857   | .391 | .184  | -1.93 | .21  |     |
|                                                          |                      | 3 | -1.033  | .395 | .068  | -2.11 | .05  |     |
|                                                          |                      | 4 | -.767   | .407 | .327  | -1.88 | .35  |     |
|                                                          | Fear of restrictions | 1 | 2       | .008 | .127  | 1.000 | -.34 | .35 |
|                                                          |                      |   | 3       | .327 | .147  | .171  | -.07 | .73 |
| 4                                                        |                      |   | -.240   | .202 | .759  | -.79  | .31  |     |
| 5                                                        |                      |   | -1.373  | .538 | .081  | -2.84 | .10  |     |
| 2                                                        |                      | 1 | -.008   | .127 | 1.000 | -.35  | .34  |     |
|                                                          |                      | 3 | .319    | .181 | .397  | -.18  | .81  |     |
|                                                          |                      | 4 | -.248   | .228 | .814  | -.87  | .38  |     |
|                                                          |                      | 5 | -1.381  | .549 | .088  | -2.88 | .12  |     |
| 3                                                        |                      | 1 | -.327   | .147 | .171  | -.73  | .07  |     |
|                                                          |                      | 2 | -.319   | .181 | .397  | -.81  | .18  |     |
|                                                          |                      | 4 | -.567   | .240 | .126  | -1.22 | .09  |     |
|                                                          |                      | 5 | -1.700* | .553 | .019  | -3.21 | -.19 |     |
| 4                                                        |                      | 1 | .240    | .202 | .759  | -.31  | .79  |     |
|                                                          |                      | 2 | .248    | .228 | .814  | -.38  | .87  |     |
|                                                          |                      | 3 | .567    | .240 | .126  | -.09  | 1.22 |     |
|                                                          |                      | 5 | -1.133  | .570 | .273  | -2.69 | .43  |     |
| 5                                                        |                      | 1 | 1.373   | .538 | .081  | -.10  | 2.84 |     |
|                                                          |                      | 2 | 1.381   | .549 | .088  | -.12  | 2.88 |     |
|                                                          |                      | 3 | 1.700*  | .553 | .019  | .19   | 3.21 |     |
|                                                          |                      | 4 | 1.133   | .570 | .273  | -.43  | 2.69 |     |
| *. The mean difference is significant at the 0.05 level. |                      |   |         |      |       |       |      |     |

| Multiple Comparisons      |            |            |                          |               |       |                         |                |
|---------------------------|------------|------------|--------------------------|---------------|-------|-------------------------|----------------|
| Tukey HSD                 |            |            |                          |               |       |                         |                |
| Dependent Variable        | (I)<br>Age | (J)<br>Age | Mean Difference<br>(I-J) | Std.<br>Error | Sig.  | 95% Confidence Interval |                |
|                           |            |            |                          |               |       | Lower<br>Bound          | Upper<br>Bound |
| I wash my hands with soap | 1          | 2          | .061                     | .053          | .775  | -.08                    | .21            |
|                           |            | 3          | -.025                    | .061          | .994  | -.19                    | .14            |
|                           |            | 4          | -.091                    | .084          | .813  | -.32                    | .14            |
|                           |            | 5          | -.225                    | .224          | .853  | -.84                    | .39            |
|                           | 2          | 1          | -.061                    | .053          | .775  | -.21                    | .08            |
|                           |            | 3          | -.086                    | .075          | .786  | -.29                    | .12            |
|                           |            | 4          | -.152                    | .095          | .492  | -.41                    | .11            |
|                           |            | 5          | -.286                    | .228          | .720  | -.91                    | .34            |
|                           | 3          | 1          | .025                     | .061          | .994  | -.14                    | .19            |
|                           |            | 2          | .086                     | .075          | .786  | -.12                    | .29            |
|                           |            | 4          | -.067                    | .100          | .963  | -.34                    | .21            |
|                           |            | 5          | -.200                    | .230          | .908  | -.83                    | .43            |
|                           | 4          | 1          | .091                     | .084          | .813  | -.14                    | .32            |
|                           |            | 2          | .152                     | .095          | .492  | -.11                    | .41            |
|                           |            | 3          | .067                     | .100          | .963  | -.21                    | .34            |
|                           |            | 5          | -.133                    | .237          | .980  | -.78                    | .51            |
|                           | 5          | 1          | .225                     | .224          | .853  | -.39                    | .84            |
|                           |            | 2          | .286                     | .228          | .720  | -.34                    | .91            |
|                           |            | 3          | .200                     | .230          | .908  | -.43                    | .83            |
|                           |            | 4          | .133                     | .237          | .980  | -.51                    | .78            |
| I'm disinfecting my hands | 1          | 2          | -.025                    | .085          | .998  | -.26                    | .21            |
|                           |            | 3          | .008                     | .098          | 1.000 | -.26                    | .28            |
|                           |            | 4          | .141                     | .135          | .835  | -.23                    | .51            |
|                           |            | 5          | -.525                    | .361          | .591  | -1.51                   | .46            |
|                           | 2          | 1          | .025                     | .085          | .998  | -.21                    | .26            |
|                           |            | 3          | .033                     | .121          | .999  | -.30                    | .37            |
|                           |            | 4          | .167                     | .153          | .811  | -.25                    | .58            |
|                           |            | 5          | -.500                    | .368          | .653  | -1.50                   | .50            |
|                           | 3          | 1          | -.008                    | .098          | 1.000 | -.28                    | .26            |
|                           |            | 2          | -.033                    | .121          | .999  | -.37                    | .30            |
|                           |            | 4          | .133                     | .161          | .921  | -.31                    | .57            |
|                           |            | 5          | -.533                    | .371          | .603  | -1.55                   | .48            |
|                           | 4          | 1          | -.141                    | .135          | .835  | -.51                    | .23            |
|                           |            | 2          | -.167                    | .153          | .811  | -.58                    | .25            |

|                          |   |   |         |      |       |       |      |
|--------------------------|---|---|---------|------|-------|-------|------|
|                          |   | 3 | -.133   | .161 | .921  | -.57  | .31  |
|                          |   | 5 | -.667   | .382 | .407  | -1.71 | .38  |
|                          | 5 | 1 | .525    | .361 | .591  | -.46  | 1.51 |
|                          |   | 2 | .500    | .368 | .653  | -.50  | 1.50 |
|                          |   | 3 | .533    | .371 | .603  | -.48  | 1.55 |
|                          |   | 4 | .667    | .382 | .407  | -.38  | 1.71 |
| I wear a protective mask | 1 | 2 | -.262   | .164 | .498  | -.71  | .19  |
|                          |   | 3 | -.009   | .189 | 1.000 | -.53  | .51  |
|                          |   | 4 | -.209   | .260 | .929  | -.92  | .50  |
|                          |   | 5 | -1.809  | .694 | .070  | -3.70 | .09  |
|                          | 2 | 1 | .262    | .164 | .498  | -.19  | .71  |
|                          |   | 3 | .252    | .233 | .816  | -.39  | .89  |
|                          |   | 4 | .052    | .294 | 1.000 | -.75  | .86  |
|                          |   | 5 | -1.548  | .707 | .184  | -3.48 | .38  |
|                          | 3 | 1 | .009    | .189 | 1.000 | -.51  | .53  |
|                          |   | 2 | -.252   | .233 | .816  | -.89  | .39  |
|                          |   | 4 | -.200   | .309 | .967  | -1.04 | .64  |
|                          |   | 5 | -1.800  | .713 | .086  | -3.75 | .15  |
|                          | 4 | 1 | .209    | .260 | .929  | -.50  | .92  |
|                          |   | 2 | -.052   | .294 | 1.000 | -.86  | .75  |
|                          |   | 3 | .200    | .309 | .967  | -.64  | 1.04 |
|                          |   | 5 | -1.600  | .735 | .190  | -3.61 | .41  |
|                          | 5 | 1 | 1.809   | .694 | .070  | -.09  | 3.70 |
|                          |   | 2 | 1.548   | .707 | .184  | -.38  | 3.48 |
|                          |   | 3 | 1.800   | .713 | .086  | -.15  | 3.75 |
|                          |   | 4 | 1.600   | .735 | .190  | -.41  | 3.61 |
| I wear protective gloves | 1 | 2 | -.218   | .161 | .658  | -.66  | .22  |
|                          |   | 3 | -.366   | .186 | .286  | -.87  | .14  |
|                          |   | 4 | -.399   | .256 | .525  | -1.10 | .30  |
|                          |   | 5 | -1.932* | .683 | .038  | -3.80 | -.07 |
|                          | 2 | 1 | .218    | .161 | .658  | -.22  | .66  |
|                          |   | 3 | -.148   | .230 | .968  | -.78  | .48  |
|                          |   | 4 | -.181   | .289 | .971  | -.97  | .61  |
|                          |   | 5 | -1.714  | .696 | .100  | -3.62 | .19  |
|                          | 3 | 1 | .366    | .186 | .286  | -.14  | .87  |
|                          |   | 2 | .148    | .230 | .968  | -.48  | .78  |
|                          |   | 4 | -.033   | .304 | 1.000 | -.86  | .80  |
|                          |   | 5 | -1.567  | .702 | .169  | -3.49 | .35  |
|                          | 4 | 1 | .399    | .256 | .525  | -.30  | 1.10 |
|                          |   | 2 | .181    | .289 | .971  | -.61  | .97  |
|                          |   | 3 | .033    | .304 | 1.000 | -.80  | .86  |
|                          |   | 5 | -1.533  | .724 | .213  | -3.51 | .44  |

|                                        |   |   |        |      |       |       |      |
|----------------------------------------|---|---|--------|------|-------|-------|------|
|                                        | 5 | 1 | 1.932* | .683 | .038  | .07   | 3.80 |
|                                        |   | 2 | 1.714  | .696 | .100  | -.19  | 3.62 |
|                                        |   | 3 | 1.567  | .702 | .169  | -.35  | 3.49 |
|                                        |   | 4 | 1.533  | .724 | .213  | -.44  | 3.51 |
| I don't touch my face                  | 1 | 2 | .075   | .113 | .964  | -.23  | .38  |
|                                        |   | 3 | -.134  | .131 | .843  | -.49  | .22  |
|                                        |   | 4 | -.268  | .180 | .570  | -.76  | .22  |
|                                        |   | 5 | -.568  | .480 | .761  | -1.88 | .74  |
|                                        | 2 | 1 | -.075  | .113 | .964  | -.38  | .23  |
|                                        |   | 3 | -.210  | .162 | .693  | -.65  | .23  |
|                                        |   | 4 | -.343  | .203 | .442  | -.90  | .21  |
|                                        |   | 5 | -.643  | .489 | .682  | -1.98 | .69  |
|                                        | 3 | 1 | .134   | .131 | .843  | -.22  | .49  |
|                                        |   | 2 | .210   | .162 | .693  | -.23  | .65  |
|                                        |   | 4 | -.133  | .214 | .971  | -.72  | .45  |
|                                        |   | 5 | -.433  | .493 | .905  | -1.78 | .92  |
|                                        | 4 | 1 | .268   | .180 | .570  | -.22  | .76  |
|                                        |   | 2 | .343   | .203 | .442  | -.21  | .90  |
|                                        |   | 3 | .133   | .214 | .971  | -.45  | .72  |
|                                        |   | 5 | -.300  | .509 | .977  | -1.69 | 1.09 |
|                                        | 5 | 1 | .568   | .480 | .761  | -.74  | 1.88 |
|                                        |   | 2 | .643   | .489 | .682  | -.69  | 1.98 |
|                                        |   | 3 | .433   | .493 | .905  | -.92  | 1.78 |
|                                        |   | 4 | .300   | .509 | .977  | -1.09 | 1.69 |
| I don't shake hands with acquaintances | 1 | 2 | -.285* | .082 | .005  | -.51  | -.06 |
|                                        |   | 3 | -.228  | .095 | .113  | -.49  | .03  |
|                                        |   | 4 | -.361* | .130 | .044  | -.72  | -.01 |
|                                        |   | 5 | -.428  | .346 | .730  | -1.37 | .52  |
|                                        | 2 | 1 | .285*  | .082 | .005  | .06   | .51  |
|                                        |   | 3 | .057   | .117 | .988  | -.26  | .38  |
|                                        |   | 4 | -.076  | .147 | .985  | -.48  | .32  |
|                                        |   | 5 | -.143  | .353 | .994  | -1.11 | .82  |
|                                        | 3 | 1 | .228   | .095 | .113  | -.03  | .49  |
|                                        |   | 2 | -.057  | .117 | .988  | -.38  | .26  |
|                                        |   | 4 | -.133  | .154 | .910  | -.55  | .29  |
|                                        |   | 5 | -.200  | .356 | .980  | -1.17 | .77  |
|                                        | 4 | 1 | .361*  | .130 | .044  | .01   | .72  |
|                                        |   | 2 | .076   | .147 | .985  | -.32  | .48  |
|                                        |   | 3 | .133   | .154 | .910  | -.29  | .55  |
|                                        |   | 5 | -.067  | .367 | 1.000 | -1.07 | .94  |
|                                        | 5 | 1 | .428   | .346 | .730  | -.52  | 1.37 |
|                                        |   | 2 | .143   | .353 | .994  | -.82  | 1.11 |

|                        |   |   |        |      |       |       |      |
|------------------------|---|---|--------|------|-------|-------|------|
|                        |   | 3 | .200   | .356 | .980  | -.77  | 1.17 |
|                        |   | 4 | .067   | .367 | 1.000 | -.94  | 1.07 |
| I'm not hugging others | 1 | 2 | -.301  | .113 | .059  | -.61  | .01  |
|                        |   | 3 | -.334  | .130 | .078  | -.69  | .02  |
|                        |   | 4 | -.268  | .179 | .567  | -.76  | .22  |
|                        |   | 5 | -.801  | .478 | .449  | -2.11 | .51  |
|                        |   |   |        |      |       |       |      |
|                        | 2 | 1 | .301   | .113 | .059  | -.01  | .61  |
|                        |   | 3 | -.033  | .161 | 1.000 | -.47  | .41  |
|                        |   | 4 | .033   | .202 | 1.000 | -.52  | .59  |
|                        |   | 5 | -.500  | .487 | .843  | -1.83 | .83  |
|                        | 3 | 1 | .334   | .130 | .078  | -.02  | .69  |
|                        |   | 2 | .033   | .161 | 1.000 | -.41  | .47  |
|                        |   | 4 | .067   | .213 | .998  | -.51  | .65  |
|                        |   | 5 | -.467  | .491 | .877  | -1.81 | .88  |
|                        | 4 | 1 | .268   | .179 | .567  | -.22  | .76  |
|                        |   | 2 | -.033  | .202 | 1.000 | -.59  | .52  |
|                        |   | 3 | -.067  | .213 | .998  | -.65  | .51  |
|                        |   | 5 | -.533  | .507 | .831  | -1.92 | .85  |
|                        | 5 | 1 | .801   | .478 | .449  | -.51  | 2.11 |
|                        |   | 2 | .500   | .487 | .843  | -.83  | 1.83 |
|                        |   | 3 | .467   | .491 | .877  | -.88  | 1.81 |
|                        |   | 4 | .533   | .507 | .831  | -.85  | 1.92 |
| I do not kiss others   | 1 | 2 | -.448* | .117 | .001  | -.77  | -.13 |
|                        |   | 3 | -.472* | .136 | .005  | -.84  | -.10 |
|                        |   | 4 | -.272  | .187 | .592  | -.78  | .24  |
|                        |   | 5 | -.805  | .498 | .487  | -2.17 | .56  |
|                        | 2 | 1 | .448*  | .117 | .001  | .13   | .77  |
|                        |   | 3 | -.024  | .168 | 1.000 | -.48  | .43  |
|                        |   | 4 | .176   | .211 | .920  | -.40  | .75  |
|                        |   | 5 | -.357  | .508 | .956  | -1.74 | 1.03 |
|                        | 3 | 1 | .472*  | .136 | .005  | .10   | .84  |
|                        |   | 2 | .024   | .168 | 1.000 | -.43  | .48  |
|                        |   | 4 | .200   | .222 | .896  | -.41  | .81  |
|                        |   | 5 | -.333  | .512 | .966  | -1.73 | 1.07 |
|                        | 4 | 1 | .272   | .187 | .592  | -.24  | .78  |
|                        |   | 2 | -.176  | .211 | .920  | -.75  | .40  |
|                        |   | 3 | -.200  | .222 | .896  | -.81  | .41  |
|                        |   | 5 | -.533  | .528 | .851  | -1.98 | .91  |
|                        | 5 | 1 | .805   | .498 | .487  | -.56  | 2.17 |
|                        |   | 2 | .357   | .508 | .956  | -1.03 | 1.74 |
|                        |   | 3 | .333   | .512 | .966  | -1.07 | 1.73 |
|                        |   | 4 | .533   | .528 | .851  | -.91  | 1.98 |

|                                   |   |   |        |      |       |       |      |
|-----------------------------------|---|---|--------|------|-------|-------|------|
| Maintaining recommended distance  | 1 | 2 | -.560* | .106 | .000  | -.85  | -.27 |
|                                   |   | 3 | -.546* | .123 | .000  | -.88  | -.21 |
|                                   |   | 4 | -.746* | .168 | .000  | -1.21 | -.29 |
|                                   |   | 5 | -1.013 | .449 | .160  | -2.24 | .21  |
|                                   | 2 | 1 | .560*  | .106 | .000  | .27   | .85  |
|                                   |   | 3 | .014   | .151 | 1.000 | -.40  | .43  |
|                                   |   | 4 | -.186  | .190 | .866  | -.71  | .33  |
|                                   |   | 5 | -.452  | .458 | .861  | -1.70 | .80  |
|                                   | 3 | 1 | .546*  | .123 | .000  | .21   | .88  |
|                                   |   | 2 | -.014  | .151 | 1.000 | -.43  | .40  |
|                                   |   | 4 | -.200  | .200 | .855  | -.75  | .35  |
|                                   |   | 5 | -.467  | .462 | .851  | -1.73 | .80  |
|                                   | 4 | 1 | .746*  | .168 | .000  | .29   | 1.21 |
|                                   |   | 2 | .186   | .190 | .866  | -.33  | .71  |
|                                   |   | 3 | .200   | .200 | .855  | -.35  | .75  |
|                                   |   | 5 | -.267  | .476 | .981  | -1.57 | 1.03 |
|                                   | 5 | 1 | 1.013  | .449 | .160  | -.21  | 2.24 |
|                                   |   | 2 | .452   | .458 | .861  | -.80  | 1.70 |
|                                   |   | 3 | .467   | .462 | .851  | -.80  | 1.73 |
|                                   |   | 4 | .267   | .476 | .981  | -1.03 | 1.57 |
| I respect movement restrictions   | 1 | 2 | -.129* | .043 | .024  | -.25  | -.01 |
|                                   |   | 3 | -.053  | .050 | .830  | -.19  | .08  |
|                                   |   | 4 | -.153  | .068 | .171  | -.34  | .03  |
|                                   |   | 5 | -.153  | .183 | .920  | -.65  | .35  |
|                                   | 2 | 1 | .129*  | .043 | .024  | .01   | .25  |
|                                   |   | 3 | .076   | .061 | .728  | -.09  | .24  |
|                                   |   | 4 | -.024  | .077 | .998  | -.24  | .19  |
|                                   |   | 5 | -.024  | .186 | 1.000 | -.53  | .48  |
|                                   | 3 | 1 | .053   | .050 | .830  | -.08  | .19  |
|                                   |   | 2 | -.076  | .061 | .728  | -.24  | .09  |
|                                   |   | 4 | -.100  | .081 | .734  | -.32  | .12  |
|                                   |   | 5 | -.100  | .188 | .984  | -.61  | .41  |
|                                   | 4 | 1 | .153   | .068 | .171  | -.03  | .34  |
|                                   |   | 2 | .024   | .077 | .998  | -.19  | .24  |
|                                   |   | 3 | .100   | .081 | .734  | -.12  | .32  |
|                                   |   | 5 | .000   | .194 | 1.000 | -.53  | .53  |
|                                   | 5 | 1 | .153   | .183 | .920  | -.35  | .65  |
|                                   |   | 2 | .024   | .186 | 1.000 | -.48  | .53  |
|                                   |   | 3 | .100   | .188 | .984  | -.41  | .61  |
|                                   |   | 4 | .000   | .194 | 1.000 | -.53  | .53  |
| I avoid contacts with the elderly | 1 | 2 | -.198  | .080 | .095  | -.42  | .02  |
|                                   |   | 3 | -.031  | .092 | .997  | -.28  | .22  |

|                                           |   |   |         |      |      |       |      |
|-------------------------------------------|---|---|---------|------|------|-------|------|
|                                           |   | 4 | .769*   | .126 | .000 | .42   | 1.11 |
|                                           |   | 5 | -.364   | .337 | .817 | -1.29 | .56  |
|                                           | 2 | 1 | .198    | .080 | .095 | -.02  | .42  |
|                                           |   | 3 | .167    | .114 | .584 | -.14  | .48  |
|                                           |   | 4 | .967*   | .143 | .000 | .58   | 1.36 |
|                                           |   | 5 | -.167   | .344 | .989 | -1.11 | .77  |
|                                           | 3 | 1 | .031    | .092 | .997 | -.22  | .28  |
|                                           |   | 2 | -.167   | .114 | .584 | -.48  | .14  |
|                                           |   | 4 | .800*   | .150 | .000 | .39   | 1.21 |
|                                           |   | 5 | -.333   | .347 | .873 | -1.28 | .61  |
|                                           | 4 | 1 | -.769*  | .126 | .000 | -1.11 | -.42 |
|                                           |   | 2 | -.967*  | .143 | .000 | -1.36 | -.58 |
|                                           |   | 3 | -.800*  | .150 | .000 | -1.21 | -.39 |
|                                           |   | 5 | -1.133* | .358 | .014 | -2.11 | -.16 |
|                                           | 5 | 1 | .364    | .337 | .817 | -.56  | 1.29 |
|                                           |   | 2 | .167    | .344 | .989 | -.77  | 1.11 |
|                                           |   | 3 | .333    | .347 | .873 | -.61  | 1.28 |
|                                           |   | 4 | 1.133*  | .358 | .014 | .16   | 2.11 |
| I don't meet with family members          | 1 | 2 | -.298   | .117 | .081 | -.62  | .02  |
|                                           |   | 3 | -.089   | .135 | .966 | -.46  | .28  |
|                                           |   | 4 | .045    | .186 | .999 | -.46  | .55  |
|                                           |   | 5 | -.822   | .496 | .460 | -2.18 | .53  |
|                                           | 2 | 1 | .298    | .117 | .081 | -.02  | .62  |
|                                           |   | 3 | .210    | .167 | .718 | -.25  | .67  |
|                                           |   | 4 | .343    | .210 | .477 | -.23  | .92  |
|                                           |   | 5 | -.524   | .505 | .838 | -1.90 | .86  |
|                                           | 3 | 1 | .089    | .135 | .966 | -.28  | .46  |
|                                           |   | 2 | -.210   | .167 | .718 | -.67  | .25  |
|                                           |   | 4 | .133    | .221 | .974 | -.47  | .74  |
|                                           |   | 5 | -.733   | .510 | .603 | -2.13 | .66  |
|                                           | 4 | 1 | -.045   | .186 | .999 | -.55  | .46  |
|                                           |   | 2 | -.343   | .210 | .477 | -.92  | .23  |
|                                           |   | 3 | -.133   | .221 | .974 | -.74  | .47  |
|                                           |   | 5 | -.867   | .525 | .466 | -2.30 | .57  |
|                                           | 5 | 1 | .822    | .496 | .460 | -.53  | 2.18 |
|                                           |   | 2 | .524    | .505 | .838 | -.86  | 1.90 |
|                                           |   | 3 | .733    | .510 | .603 | -.66  | 2.13 |
|                                           |   | 4 | .867    | .525 | .466 | -.57  | 2.30 |
| I use disinfectants for clothes and shoes | 1 | 2 | -.382*  | .135 | .039 | -.75  | -.01 |
|                                           |   | 3 | -.453*  | .157 | .032 | -.88  | -.03 |
|                                           |   | 4 | -.253   | .215 | .764 | -.84  | .33  |
|                                           |   | 5 | -1.453  | .574 | .084 | -3.02 | .12  |

|                              |   |   |         |      |      |       |      |
|------------------------------|---|---|---------|------|------|-------|------|
|                              | 2 | 1 | .382*   | .135 | .039 | .01   | .75  |
|                              |   | 3 | -.071   | .193 | .996 | -.60  | .46  |
|                              |   | 4 | .129    | .243 | .984 | -.54  | .79  |
|                              |   | 5 | -1.071  | .585 | .356 | -2.67 | .53  |
|                              | 3 | 1 | .453*   | .157 | .032 | .03   | .88  |
|                              |   | 2 | .071    | .193 | .996 | -.46  | .60  |
|                              |   | 4 | .200    | .256 | .936 | -.50  | .90  |
|                              |   | 5 | -1.000  | .590 | .438 | -2.61 | .61  |
|                              | 4 | 1 | .253    | .215 | .764 | -.33  | .84  |
|                              |   | 2 | -.129   | .243 | .984 | -.79  | .54  |
|                              |   | 3 | -.200   | .256 | .936 | -.90  | .50  |
|                              |   | 5 | -1.200  | .608 | .280 | -2.86 | .46  |
|                              | 5 | 1 | 1.453   | .574 | .084 | -.12  | 3.02 |
|                              |   | 2 | 1.071   | .585 | .356 | -.53  | 2.67 |
|                              |   | 3 | 1.000   | .590 | .438 | -.61  | 2.61 |
|                              |   | 4 | 1.200   | .608 | .280 | -.46  | 2.86 |
| Disinfection of pets paws    | 1 | 2 | .270    | .171 | .515 | -.20  | .74  |
|                              |   | 3 | -.488   | .198 | .101 | -1.03 | .05  |
|                              |   | 4 | -.688   | .272 | .086 | -1.43 | .06  |
|                              |   | 5 | -1.754  | .727 | .112 | -3.74 | .23  |
|                              | 2 | 1 | -.270   | .171 | .515 | -.74  | .20  |
|                              |   | 3 | -.757*  | .245 | .017 | -1.43 | -.09 |
|                              |   | 4 | -.957*  | .308 | .016 | -1.80 | -.12 |
|                              |   | 5 | -2.024  | .741 | .050 | -4.05 | .00  |
|                              | 3 | 1 | .488    | .198 | .101 | -.05  | 1.03 |
|                              |   | 2 | .757*   | .245 | .017 | .09   | 1.43 |
|                              |   | 4 | -.200   | .324 | .972 | -1.08 | .68  |
|                              |   | 5 | -1.267  | .747 | .437 | -3.31 | .78  |
|                              | 4 | 1 | .688    | .272 | .086 | -.06  | 1.43 |
|                              |   | 2 | .957*   | .308 | .016 | .12   | 1.80 |
|                              |   | 3 | .200    | .324 | .972 | -.68  | 1.08 |
|                              |   | 5 | -1.067  | .770 | .638 | -3.17 | 1.04 |
|                              | 5 | 1 | 1.754   | .727 | .112 | -.23  | 3.74 |
|                              |   | 2 | 2.024   | .741 | .050 | .00   | 4.05 |
|                              |   | 3 | 1.267   | .747 | .437 | -.78  | 3.31 |
|                              |   | 4 | 1.067   | .770 | .638 | -1.04 | 3.17 |
| I have no contacts with pets | 1 | 2 | .437    | .169 | .073 | -.02  | .90  |
|                              |   | 3 | -1.034* | .195 | .000 | -1.57 | -.50 |
|                              |   | 4 | .966*   | .269 | .003 | .23   | 1.70 |
|                              |   | 5 | -2.301* | .716 | .012 | -4.26 | -.34 |
|                              | 2 | 1 | -.437   | .169 | .073 | -.90  | .02  |
|                              |   | 3 | -1.471* | .241 | .000 | -2.13 | -.81 |

|                                  |   |   |         |      |       |       |       |
|----------------------------------|---|---|---------|------|-------|-------|-------|
|                                  |   | 4 | .529    | .303 | .408  | -.30  | 1.36  |
|                                  |   | 5 | -2.738* | .730 | .002  | -4.73 | -.74  |
|                                  | 3 | 1 | 1.034*  | .195 | .000  | .50   | 1.57  |
|                                  |   | 2 | 1.471*  | .241 | .000  | .81   | 2.13  |
|                                  |   | 4 | 2.000*  | .319 | .000  | 1.13  | 2.87  |
|                                  |   | 5 | -1.267  | .737 | .422  | -3.28 | .75   |
|                                  | 4 | 1 | -.966*  | .269 | .003  | -1.70 | -.23  |
|                                  |   | 2 | -.529   | .303 | .408  | -1.36 | .30   |
|                                  |   | 3 | -2.000* | .319 | .000  | -2.87 | -1.13 |
|                                  |   | 5 | -3.267* | .759 | .000  | -5.34 | -1.19 |
|                                  | 5 | 1 | 2.301*  | .716 | .012  | .34   | 4.26  |
|                                  |   | 2 | 2.738*  | .730 | .002  | .74   | 4.73  |
|                                  |   | 3 | 1.267   | .737 | .422  | -.75  | 3.28  |
|                                  |   | 4 | 3.267*  | .759 | .000  | 1.19  | 5.34  |
| Plan isolation household members | 1 | 2 | -.427*  | .147 | .031  | -.83  | -.03  |
|                                  |   | 3 | -.484*  | .170 | .036  | -.95  | -.02  |
|                                  |   | 4 | -.484   | .234 | .233  | -1.12 | .15   |
|                                  |   | 5 | -2.284* | .623 | .002  | -3.99 | -.58  |
|                                  | 2 | 1 | .427*   | .147 | .031  | .03   | .83   |
|                                  |   | 3 | -.057   | .210 | .999  | -.63  | .52   |
|                                  |   | 4 | -.057   | .264 | 1.000 | -.78  | .66   |
|                                  |   | 5 | -1.857* | .635 | .029  | -3.59 | -.12  |
|                                  | 3 | 1 | .484*   | .170 | .036  | .02   | .95   |
|                                  |   | 2 | .057    | .210 | .999  | -.52  | .63   |
|                                  |   | 4 | .000    | .277 | 1.000 | -.76  | .76   |
|                                  |   | 5 | -1.800* | .641 | .040  | -3.55 | -.05  |
|                                  | 4 | 1 | .484    | .234 | .233  | -.15  | 1.12  |
|                                  |   | 2 | .057    | .264 | 1.000 | -.66  | .78   |
|                                  |   | 3 | .000    | .277 | 1.000 | -.76  | .76   |
|                                  |   | 5 | -1.800  | .660 | .051  | -3.60 | .00   |
|                                  | 5 | 1 | 2.284*  | .623 | .002  | .58   | 3.99  |
|                                  |   | 2 | 1.857*  | .635 | .029  | .12   | 3.59  |
|                                  |   | 3 | 1.800*  | .641 | .040  | .05   | 3.55  |
|                                  |   | 4 | 1.800   | .660 | .051  | .00   | 3.60  |
| Household nutrition plan         | 1 | 2 | -.720*  | .138 | .000  | -1.10 | -.34  |
|                                  |   | 3 | -.772*  | .160 | .000  | -1.21 | -.34  |
|                                  |   | 4 | -.506   | .219 | .144  | -1.10 | .09   |
|                                  |   | 5 | -1.839* | .585 | .015  | -3.44 | -.24  |
|                                  | 2 | 1 | .720*   | .138 | .000  | .34   | 1.10  |
|                                  |   | 3 | -.052   | .197 | .999  | -.59  | .49   |
|                                  |   | 4 | .214    | .248 | .910  | -.46  | .89   |
|                                  |   | 5 | -1.119  | .596 | .330  | -2.75 | .51   |

|                          |   |   |        |      |      |       |      |
|--------------------------|---|---|--------|------|------|-------|------|
|                          | 3 | 1 | .772*  | .160 | .000 | .34   | 1.21 |
|                          |   | 2 | .052   | .197 | .999 | -.49  | .59  |
|                          |   | 4 | .267   | .260 | .844 | -.44  | .98  |
|                          |   | 5 | -1.067 | .601 | .389 | -2.71 | .58  |
|                          | 4 | 1 | .506   | .219 | .144 | -.09  | 1.10 |
|                          |   | 2 | -.214  | .248 | .910 | -.89  | .46  |
|                          |   | 3 | -.267  | .260 | .844 | -.98  | .44  |
|                          |   | 5 | -1.333 | .620 | .199 | -3.03 | .36  |
|                          | 5 | 1 | 1.839* | .585 | .015 | .24   | 3.44 |
|                          |   | 2 | 1.119  | .596 | .330 | -.51  | 2.75 |
|                          |   | 3 | 1.067  | .601 | .389 | -.58  | 2.71 |
|                          |   | 4 | 1.333  | .620 | .199 | -.36  | 3.03 |
| I have groceries         | 1 | 2 | -.357* | .116 | .018 | -.67  | -.04 |
|                          |   | 3 | -.176  | .134 | .681 | -.54  | .19  |
|                          |   | 4 | -.276  | .184 | .561 | -.78  | .23  |
|                          |   | 5 | -.809  | .490 | .464 | -2.15 | .53  |
|                          | 2 | 1 | .357*  | .116 | .018 | .04   | .67  |
|                          |   | 3 | .181   | .165 | .808 | -.27  | .63  |
|                          |   | 4 | .081   | .207 | .995 | -.49  | .65  |
|                          |   | 5 | -.452  | .499 | .895 | -1.82 | .91  |
|                          | 3 | 1 | .176   | .134 | .681 | -.19  | .54  |
|                          |   | 2 | -.181  | .165 | .808 | -.63  | .27  |
|                          |   | 4 | -.100  | .218 | .991 | -.70  | .50  |
|                          |   | 5 | -.633  | .504 | .718 | -2.01 | .74  |
|                          | 4 | 1 | .276   | .184 | .561 | -.23  | .78  |
|                          |   | 2 | -.081  | .207 | .995 | -.65  | .49  |
|                          |   | 3 | .100   | .218 | .991 | -.50  | .70  |
|                          |   | 5 | -.533  | .519 | .843 | -1.95 | .89  |
|                          | 5 | 1 | .809   | .490 | .464 | -.53  | 2.15 |
|                          |   | 2 | .452   | .499 | .895 | -.91  | 1.82 |
|                          |   | 3 | .633   | .504 | .718 | -.74  | 2.01 |
|                          |   | 4 | .533   | .519 | .843 | -.89  | 1.95 |
| I have stock for a month | 1 | 2 | -.407* | .143 | .036 | -.80  | -.02 |
|                          |   | 3 | -.312  | .166 | .326 | -.76  | .14  |
|                          |   | 4 | -.345  | .227 | .550 | -.97  | .28  |
|                          |   | 5 | -1.479 | .606 | .106 | -3.14 | .18  |
|                          | 2 | 1 | .407*  | .143 | .036 | .02   | .80  |
|                          |   | 3 | .095   | .204 | .990 | -.46  | .65  |
|                          |   | 4 | .062   | .257 | .999 | -.64  | .76  |
|                          |   | 5 | -1.071 | .618 | .414 | -2.76 | .62  |
|                          | 3 | 1 | .312   | .166 | .326 | -.14  | .76  |
|                          |   | 2 | -.095  | .204 | .990 | -.65  | .46  |

|                                                          |   |   |        |       |       |       |      |
|----------------------------------------------------------|---|---|--------|-------|-------|-------|------|
|                                                          |   | 4 | -.033  | .270  | 1.000 | -.77  | .70  |
|                                                          |   | 5 | -1.167 | .624  | .334  | -2.87 | .54  |
|                                                          | 4 | 1 | .345   | .227  | .550  | -.28  | .97  |
|                                                          |   | 2 | -.062  | .257  | .999  | -.76  | .64  |
|                                                          |   | 3 | .033   | .270  | 1.000 | -.70  | .77  |
|                                                          |   | 5 | -1.133 | .643  | .396  | -2.89 | .62  |
|                                                          |   | 5 | 1      | 1.479 | .606  | .106  | -.18 |
|                                                          | 2 |   | 1.071  | .618  | .414  | -.62  | 2.76 |
|                                                          | 3 |   | 1.167  | .624  | .334  | -.54  | 2.87 |
|                                                          | 4 |   | 1.133  | .643  | .396  | -.62  | 2.89 |
| *. The mean difference is significant at the 0.05 level. |   |   |        |       |       |       |      |

Gender – Anova tests

Post hoc tests are not performed for because there are fewer than three groups related to gender.

| ANOVA                     |                |                |     |             |        |      |
|---------------------------|----------------|----------------|-----|-------------|--------|------|
|                           |                | Sum of Squares | df  | Mean Square | F      | Sig. |
| Individual preparedness   | Between Groups | .144           | 1   | .144        | .179   | .673 |
|                           | Within Groups  | 786.446        | 973 | .808        |        |      |
|                           | Total          | 786.591        | 974 |             |        |      |
| Household preparedness    | Between Groups | 1.152          | 1   | 1.152       | 1.311  | .252 |
|                           | Within Groups  | 855.057        | 973 | .879        |        |      |
|                           | Total          | 856.209        | 974 |             |        |      |
| Community preparedness    | Between Groups | 17.683         | 1   | 17.683      | 16.873 | .000 |
|                           | Within Groups  | 1019.708       | 973 | 1.048       |        |      |
|                           | Total          | 1037.391       | 974 |             |        |      |
| State preparedness        | Between Groups | 13.779         | 1   | 13.779      | 12.751 | .000 |
|                           | Within Groups  | 1051.451       | 973 | 1.081       |        |      |
|                           | Total          | 1065.231       | 974 |             |        |      |
| Enough personal knowledge | Between Groups | 1.221          | 1   | 1.221       | 1.311  | .252 |
|                           | Within Groups  | 905.942        | 973 | .931        |        |      |
|                           | Total          | 907.163        | 974 |             |        |      |
| Enough personal training  | Between Groups | 4.570          | 1   | 4.570       | 3.958  | .047 |
|                           | Within Groups  | 1123.467       | 973 | 1.155       |        |      |
|                           | Total          | 1128.037       | 974 |             |        |      |
| Enough food supplies      | Between Groups | 9.074          | 1   | 9.074       | 7.068  | .008 |
|                           | Within Groups  | 1249.136       | 973 | 1.284       |        |      |

|                                |                |          |     |         |         |      |
|--------------------------------|----------------|----------|-----|---------|---------|------|
|                                | Total          | 1258.209 | 974 |         |         |      |
| Enough of req. prot. equipment | Between Groups | 4.188    | 1   | 4.188   | 2.706   | .100 |
|                                | Within Groups  | 1505.505 | 973 | 1.547   |         |      |
|                                | Total          | 1509.692 | 974 |         |         |      |
| Personal response plans        | Between Groups | .821     | 1   | .821    | .716    | .398 |
|                                | Within Groups  | 1115.789 | 973 | 1.147   |         |      |
|                                | Total          | 1116.609 | 974 |         |         |      |
| Enough household knowledge     | Between Groups | .901     | 1   | .901    | .971    | .325 |
|                                | Within Groups  | 902.736  | 973 | .928    |         |      |
|                                | Total          | 903.637  | 974 |         |         |      |
| First responders preparedness  | Between Groups | 3.577    | 1   | 3.577   | 3.412   | .065 |
|                                | Within Groups  | 1019.986 | 973 | 1.048   |         |      |
|                                | Total          | 1023.563 | 974 |         |         |      |
| Television                     | Between Groups | 53.134   | 1   | 53.134  | 39.906  | .000 |
|                                | Within Groups  | 1295.536 | 973 | 1.331   |         |      |
|                                | Total          | 1348.671 | 974 |         |         |      |
| Radio                          | Between Groups | .065     | 1   | .065    | .055    | .814 |
|                                | Within Groups  | 1142.243 | 973 | 1.174   |         |      |
|                                | Total          | 1142.308 | 974 |         |         |      |
| Newspaper                      | Between Groups | 6.977    | 1   | 6.977   | 4.066   | .044 |
|                                | Within Groups  | 1669.571 | 973 | 1.716   |         |      |
|                                | Total          | 1676.548 | 974 |         |         |      |
| Internet                       | Between Groups | .088     | 1   | .088    | .090    | .764 |
|                                | Within Groups  | 945.365  | 973 | .972    |         |      |
|                                | Total          | 945.452  | 974 |         |         |      |
| Scientific journal             | Between Groups | .076     | 1   | .076    | .036    | .849 |
|                                | Within Groups  | 2044.207 | 973 | 2.101   |         |      |
|                                | Total          | 2044.283 | 974 |         |         |      |
| Local medical website          | Between Groups | 42.670   | 1   | 42.670  | 23.269  | .000 |
|                                | Within Groups  | 1784.247 | 973 | 1.834   |         |      |
|                                | Total          | 1826.917 | 974 |         |         |      |
| Addressing of a statesman      | Between Groups | 141.533  | 1   | 141.533 | 103.236 | .000 |
|                                | Within Groups  | 1333.950 | 973 | 1.371   |         |      |
|                                | Total          | 1475.483 | 974 |         |         |      |
| Addressing of an expert        | Between Groups | 35.976   | 1   | 35.976  | 53.105  | .000 |
|                                | Within Groups  | 659.157  | 973 | .677    |         |      |

|                           |                |          |     |        |        |      |
|---------------------------|----------------|----------|-----|--------|--------|------|
|                           | Total          | 695.132  | 974 |        |        |      |
| The social network        | Between Groups | 4.865    | 1   | 4.865  | 2.450  | .118 |
|                           | Within Groups  | 1932.083 | 973 | 1.986  |        |      |
|                           | Total          | 1936.948 | 974 |        |        |      |
| Family members            | Between Groups | .385     | 1   | .385   | .249   | .618 |
|                           | Within Groups  | 1501.978 | 973 | 1.544  |        |      |
|                           | Total          | 1502.363 | 974 |        |        |      |
| Friends                   | Between Groups | 1.824    | 1   | 1.824  | 1.208  | .272 |
|                           | Within Groups  | 1469.505 | 973 | 1.510  |        |      |
|                           | Total          | 1471.329 | 974 |        |        |      |
| Local community           | Between Groups | .854     | 1   | .854   | .560   | .454 |
|                           | Within Groups  | 1482.955 | 973 | 1.524  |        |      |
|                           | Total          | 1483.809 | 974 |        |        |      |
| Chosen physician          | Between Groups | 1.377    | 1   | 1.377  | .814   | .367 |
|                           | Within Groups  | 1645.393 | 973 | 1.691  |        |      |
|                           | Total          | 1646.769 | 974 |        |        |      |
| Members of the ISS        | Between Groups | .355     | 1   | .355   | .184   | .668 |
|                           | Within Groups  | 1873.177 | 973 | 1.925  |        |      |
|                           | Total          | 1873.532 | 974 |        |        |      |
| Non-government org.       | Between Groups | 1.033    | 1   | 1.033  | .853   | .356 |
|                           | Within Groups  | 1177.275 | 973 | 1.210  |        |      |
|                           | Total          | 1178.308 | 974 |        |        |      |
| The likelihood of infect. | Between Groups | .030     | 1   | .030   | .024   | .877 |
|                           | Within Groups  | 1232.961 | 973 | 1.267  |        |      |
|                           | Total          | 1232.991 | 974 |        |        |      |
| Respiratory problems      | Between Groups | 15.351   | 1   | 15.351 | 13.014 | .000 |
|                           | Within Groups  | 1147.725 | 973 | 1.180  |        |      |
|                           | Total          | 1163.077 | 974 |        |        |      |
| Most severe symptoms      | Between Groups | 1.682    | 1   | 1.682  | 3.089  | .079 |
|                           | Within Groups  | 529.789  | 973 | .544   |        |      |
|                           | Total          | 531.471  | 974 |        |        |      |
| Serious health            | Between Groups | 5.108    | 1   | 5.108  | 4.797  | .029 |
|                           | Within Groups  | 1036.160 | 973 | 1.065  |        |      |
|                           | Total          | 1041.268 | 974 |        |        |      |
| Kindergarten or school    | Between Groups | .002     | 1   | .002   | .004   | .947 |
|                           | Within Groups  | 531.690  | 973 | .546   |        |      |

|                           |                |          |     |        |        |      |
|---------------------------|----------------|----------|-----|--------|--------|------|
|                           | Total          | 531.692  | 974 |        |        |      |
| A place of greater risk   | Between Groups | 1.163    | 1   | 1.163  | .518   | .472 |
|                           | Within Groups  | 2182.966 | 973 | 2.244  |        |      |
|                           | Total          | 2184.129 | 974 |        |        |      |
| Losing my job             | Between Groups | 4.663    | 1   | 4.663  | 2.105  | .147 |
|                           | Within Groups  | 2155.207 | 973 | 2.215  |        |      |
|                           | Total          | 2159.871 | 974 |        |        |      |
| Prevent behavior          | Between Groups | .072     | 1   | .072   | .121   | .728 |
|                           | Within Groups  | 579.565  | 973 | .596   |        |      |
|                           | Total          | 579.637  | 974 |        |        |      |
| The responsibility        | Between Groups | .606     | 1   | .606   | 1.053  | .305 |
|                           | Within Groups  | 560.163  | 973 | .576   |        |      |
|                           | Total          | 560.769  | 974 |        |        |      |
| Respecting measures       | Between Groups | .859     | 1   | .859   | .484   | .487 |
|                           | Within Groups  | 1728.489 | 973 | 1.776  |        |      |
|                           | Total          | 1729.348 | 974 |        |        |      |
| Information critically    | Between Groups | .997     | 1   | .997   | .925   | .336 |
|                           | Within Groups  | 1049.003 | 973 | 1.078  |        |      |
|                           | Total          | 1050.000 | 974 |        |        |      |
| I'm afraid of health      | Between Groups | 20.991   | 1   | 20.991 | 20.248 | .000 |
|                           | Within Groups  | 1008.701 | 973 | 1.037  |        |      |
|                           | Total          | 1029.692 | 974 |        |        |      |
| Econ. consequences        | Between Groups | 21.190   | 1   | 21.190 | 24.505 | .000 |
|                           | Within Groups  | 841.370  | 973 | .865   |        |      |
|                           | Total          | 862.560  | 974 |        |        |      |
| Fear of restrictions      | Between Groups | .256     | 1   | .256   | .147   | .701 |
|                           | Within Groups  | 1694.513 | 973 | 1.742  |        |      |
|                           | Total          | 1694.769 | 974 |        |        |      |
| I wash my hands with soap | Between Groups | 11.483   | 1   | 11.483 | 40.144 | .000 |
|                           | Within Groups  | 278.326  | 973 | .286   |        |      |
|                           | Total          | 289.809  | 974 |        |        |      |
| I'm disinfecting my hands | Between Groups | 29.707   | 1   | 29.707 | 39.958 | .000 |
|                           | Within Groups  | 723.376  | 973 | .743   |        |      |
|                           | Total          | 753.083  | 974 |        |        |      |
| I wear a protective mask  | Between Groups | 39.554   | 1   | 39.554 | 13.927 | .000 |
|                           | Within Groups  | 2763.369 | 973 | 2.840  |        |      |

|                                           |                |          |     |        |        |      |
|-------------------------------------------|----------------|----------|-----|--------|--------|------|
|                                           | Total          | 2802.923 | 974 |        |        |      |
| I wear protective gloves                  | Between Groups | 50.025   | 1   | 50.025 | 18.169 | .000 |
|                                           | Within Groups  | 2679.015 | 973 | 2.753  |        |      |
|                                           | Total          | 2729.040 | 974 |        |        |      |
| I don't touch my face                     | Between Groups | 35.525   | 1   | 35.525 | 26.587 | .000 |
|                                           | Within Groups  | 1300.112 | 973 | 1.336  |        |      |
|                                           | Total          | 1335.637 | 974 |        |        |      |
| I don't shake hands with acquaintances    | Between Groups | 10.597   | 1   | 10.597 | 14.784 | .000 |
|                                           | Within Groups  | 697.440  | 973 | .717   |        |      |
|                                           | Total          | 708.037  | 974 |        |        |      |
| I'm not hugging others                    | Between Groups | 2.710    | 1   | 2.710  | 1.973  | .160 |
|                                           | Within Groups  | 1336.453 | 973 | 1.374  |        |      |
|                                           | Total          | 1339.163 | 974 |        |        |      |
| I do not kiss others                      | Between Groups | 4.311    | 1   | 4.311  | 2.862  | .091 |
|                                           | Within Groups  | 1465.652 | 973 | 1.506  |        |      |
|                                           | Total          | 1469.963 | 974 |        |        |      |
| Maintaining recommended distance          | Between Groups | .011     | 1   | .011   | .009   | .926 |
|                                           | Within Groups  | 1234.826 | 973 | 1.269  |        |      |
|                                           | Total          | 1234.837 | 974 |        |        |      |
| I respect movement restrictions           | Between Groups | .022     | 1   | .022   | .107   | .743 |
|                                           | Within Groups  | 195.209  | 973 | .201   |        |      |
|                                           | Total          | 195.231  | 974 |        |        |      |
| I avoid contacts with the elderly         | Between Groups | 8.625    | 1   | 8.625  | 12.333 | .000 |
|                                           | Within Groups  | 680.452  | 973 | .699   |        |      |
|                                           | Total          | 689.077  | 974 |        |        |      |
| I don't meet with family members          | Between Groups | 53.768   | 1   | 53.768 | 37.974 | .000 |
|                                           | Within Groups  | 1377.685 | 973 | 1.416  |        |      |
|                                           | Total          | 1431.452 | 974 |        |        |      |
| I use disinfectants for clothes and shoes | Between Groups | 20.698   | 1   | 20.698 | 10.486 | .001 |
|                                           | Within Groups  | 1920.570 | 973 | 1.974  |        |      |
|                                           | Total          | 1941.268 | 974 |        |        |      |
| Disinfection of pets paws                 | Between Groups | 89.518   | 1   | 89.518 | 28.797 | .000 |
|                                           | Within Groups  | 3024.630 | 973 | 3.109  |        |      |
|                                           | Total          | 3114.148 | 974 |        |        |      |
| I have no contacts with pets              | Between Groups | 7.688    | 1   | 7.688  | 2.378  | .123 |
|                                           | Within Groups  | 3146.004 | 973 | 3.233  |        |      |

|                                  |                |          |     |        |       |      |
|----------------------------------|----------------|----------|-----|--------|-------|------|
|                                  | Total          | 3153.692 | 974 |        |       |      |
| Plan isolation household members | Between Groups | .031     | 1   | .031   | .013  | .909 |
|                                  | Within Groups  | 2306.701 | 973 | 2.371  |       |      |
|                                  | Total          | 2306.732 | 974 |        |       |      |
| Household nutrition plan         | Between Groups | 12.156   | 1   | 12.156 | 5.707 | .017 |
|                                  | Within Groups  | 2072.484 | 973 | 2.130  |       |      |
|                                  | Total          | 2084.640 | 974 |        |       |      |
| I have groceries                 | Between Groups | 2.838    | 1   | 2.838  | 1.970 | .161 |
|                                  | Within Groups  | 1401.679 | 973 | 1.441  |       |      |
|                                  | Total          | 1404.517 | 974 |        |       |      |
| I have stock for a month         | Between Groups | .026     | 1   | .026   | .012  | .915 |
|                                  | Within Groups  | 2159.827 | 973 | 2.220  |       |      |
|                                  | Total          | 2159.852 | 974 |        |       |      |
